# Supplementary material for: Interleukin-1 prevents SARS-CoV-2-induced membrane fusion to restrict viral transmission via induction of actin bundles
Source: eLife journal article supplement (doi:10.7554/elife.98593), 2024-07-16
Supplement: fig1-data1 [file elife-98593-fig1-data1-v1.pdf]

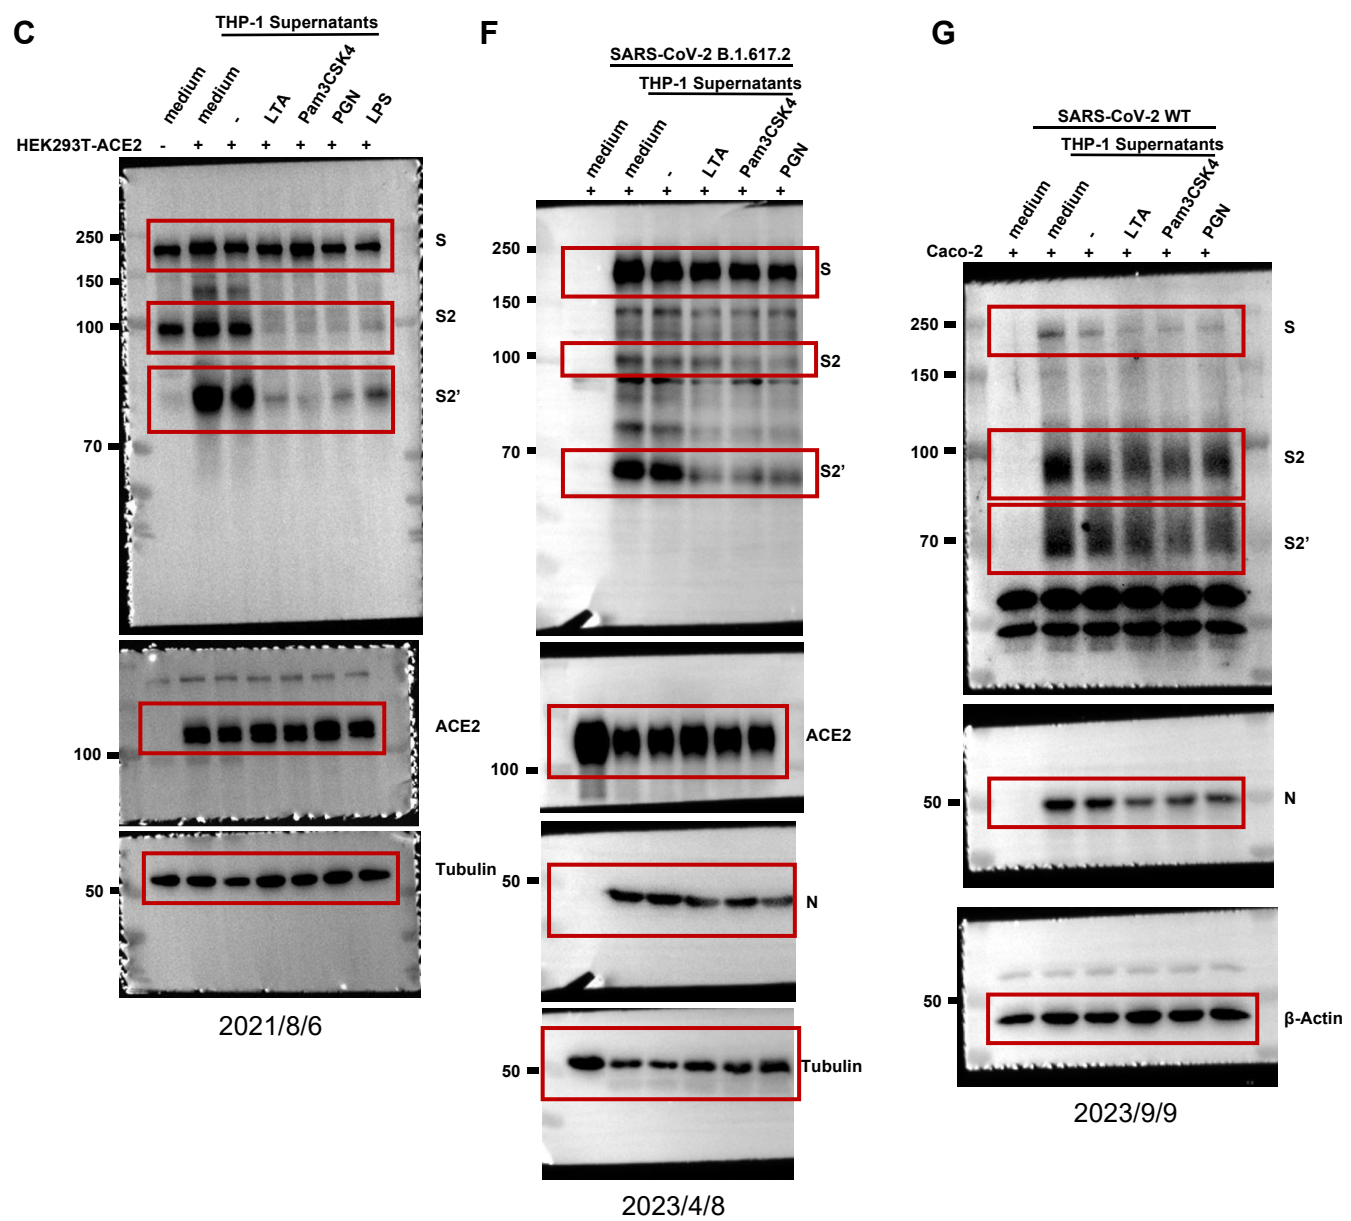

Figure 1-Source Data 1. Original membranes corresponding to Figure 1C, Figure 1F and Figure 1G.
