# Supplementary material for: Interleukin-1 prevents SARS-CoV-2-induced membrane fusion to restrict viral transmission via induction of actin bundles
Source: eLife journal article supplement (doi:10.7554/elife.98593), 2024-07-16
Supplement: fig1-figsupp1-data1 [file elife-98593-fig1-figsupp1-data1-v1.pdf]

**C**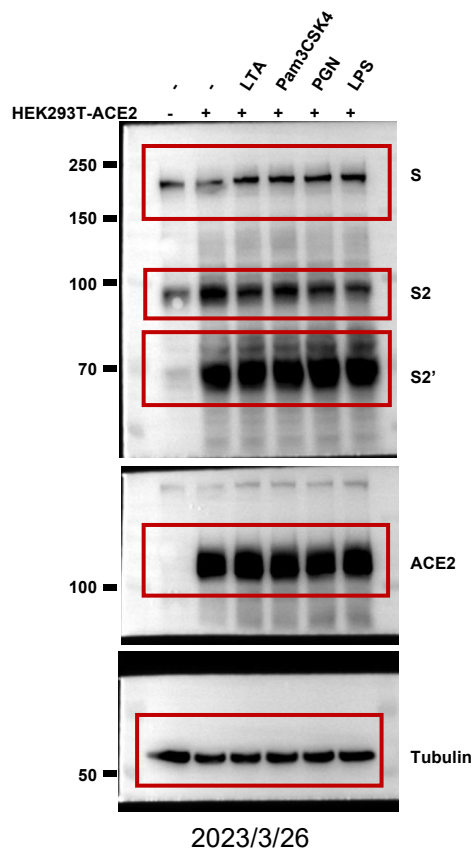**G**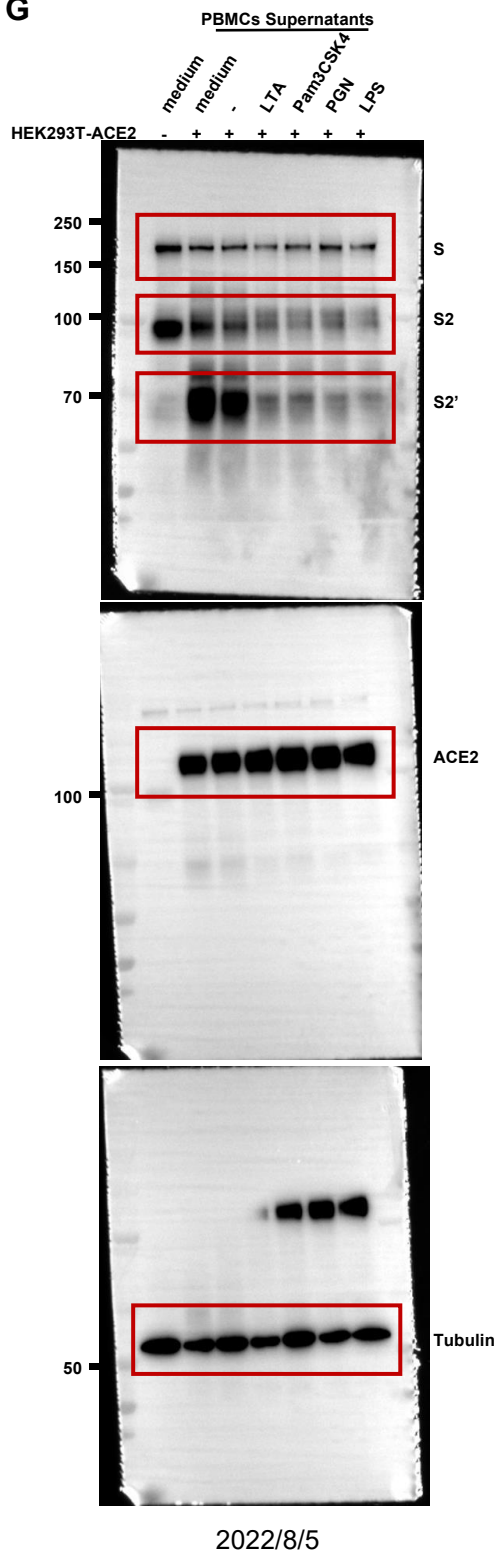

**Figure 1—Figure Supplement 1—Source Data 1.** Original membranes corresponding to Figure 1—Figure Supplement 1C and Figure 1—Figure Supplement 1G.
