# Supplementary material for: Interleukin-1 prevents SARS-CoV-2-induced membrane fusion to restrict viral transmission via induction of actin bundles
Source: eLife journal article supplement (doi:10.7554/elife.98593), 2024-07-16
Supplement: fig1-figsupp2-data1 [file elife-98593-fig1-figsupp2-data1-v1.pdf]

**A**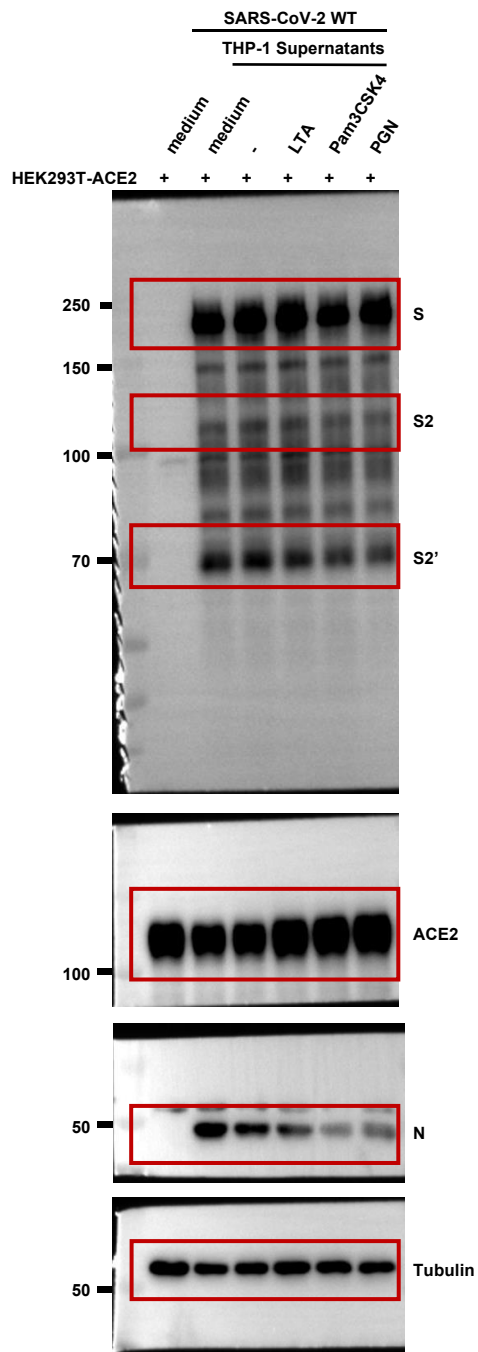

Figure 1–Figure Supplement 2–Source Data 1. Original membranes corresponding to Figure 1–Figure Supplement 2A.
