# Supplementary material for: Interleukin-1 prevents SARS-CoV-2-induced membrane fusion to restrict viral transmission via induction of actin bundles
Source: eLife journal article supplement (doi:10.7554/elife.98593), 2024-07-16
Supplement: fig2-data1 [file elife-98593-fig2-data1-v1.pdf]

**D**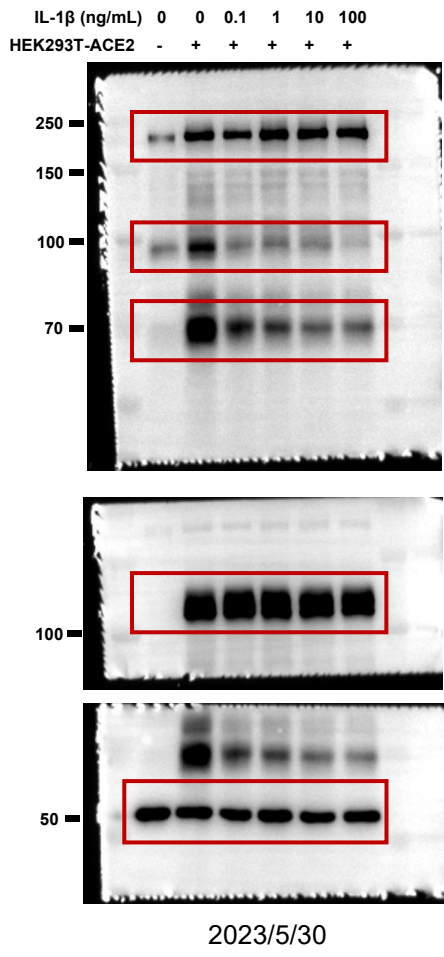**F**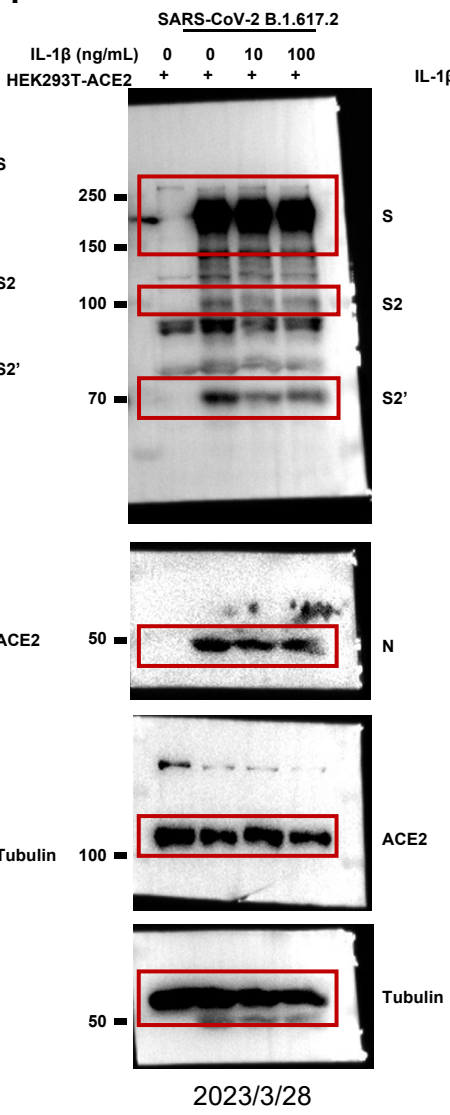**G**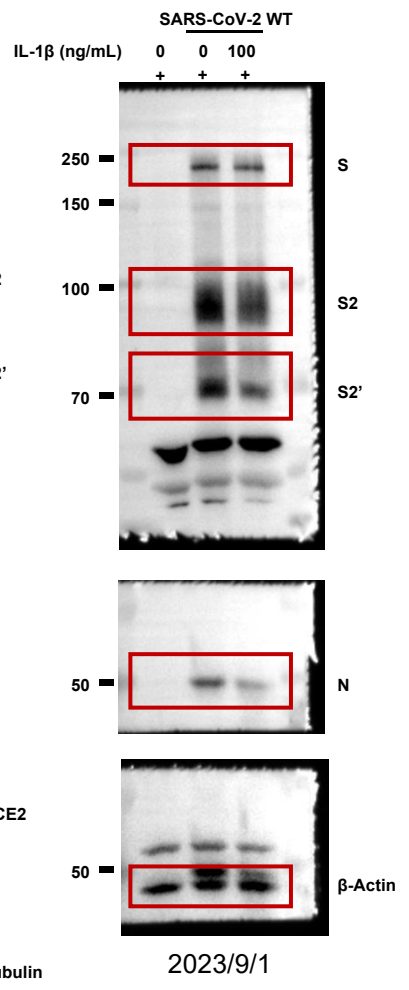

Figure 2-Source Data 1. Original membranes corresponding to Figure 2D, Figure 2F and Figure 2G.
