# Supplementary material for: Interleukin-1 prevents SARS-CoV-2-induced membrane fusion to restrict viral transmission via induction of actin bundles
Source: eLife journal article supplement (doi:10.7554/elife.98593), 2024-07-16
Supplement: fig2-figsupp2-data1 [file elife-98593-fig2-figsupp2-data1-v1.pdf]

**A**

|                       |   |   |     |   |    |     |
|-----------------------|---|---|-----|---|----|-----|
| HEK293T-ACE2          | - | + | +   | + | +  | +   |
| IL-1 $\alpha$ (ng/mL) | 0 | 0 | 0.1 | 1 | 10 | 100 |

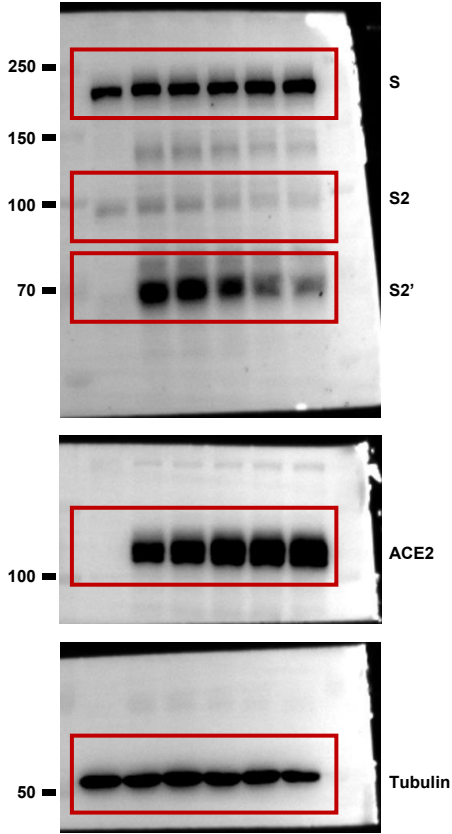

2023/5/29

**F**

|                         |   |   |   |   |   |
|-------------------------|---|---|---|---|---|
| HEK293T-ACE2            | - | + | + | + | + |
| IL-1 $\alpha$ (10ng/mL) | - | - | + | - | + |
| IL-1 $\beta$ (1ng/mL)   | - | - | - | + | + |

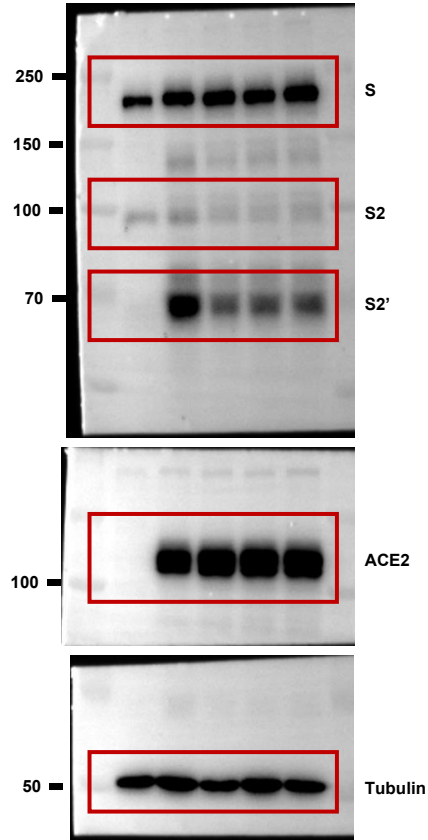

2023/5/29

**Figure 2–Figure Supplement 2–Source Data 1.** Original membranes corresponding to Figure 2–Figure Supplement 2A and Figure 2–Figure Supplement 2F.
