# Supplementary material for: Interleukin-1 prevents SARS-CoV-2-induced membrane fusion to restrict viral transmission via induction of actin bundles
Source: eLife journal article supplement (doi:10.7554/elife.98593), 2024-07-16
Supplement: fig2-figsupp3-data1 [file elife-98593-fig2-figsupp3-data1-v1.pdf]

**A**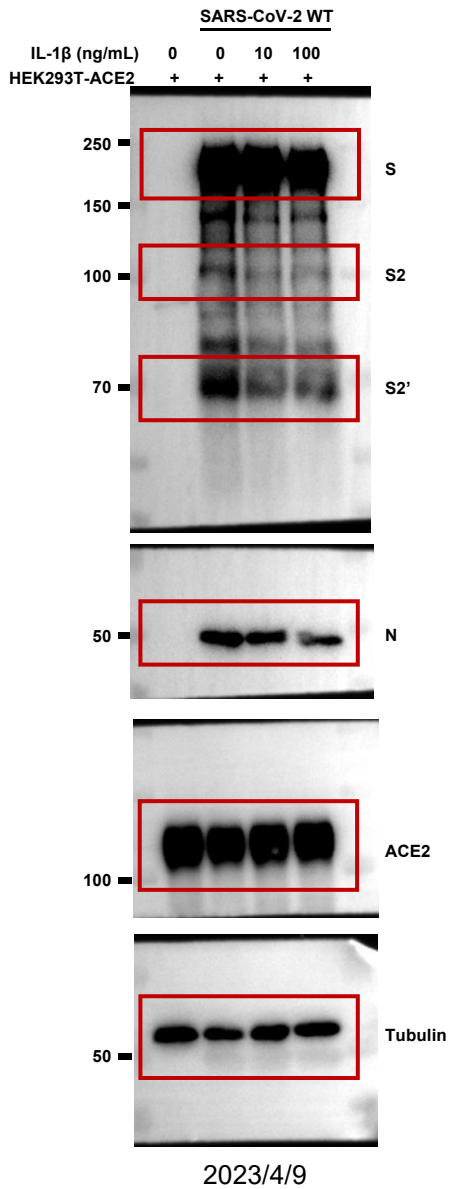

**Figure 2–Figure Supplement 3–Source Data 1.** Original membranes corresponding to Figure 2–Figure Supplement 3A.
