# Supplementary material for: Interleukin-1 prevents SARS-CoV-2-induced membrane fusion to restrict viral transmission via induction of actin bundles
Source: eLife journal article supplement (doi:10.7554/elife.98593), 2024-07-16
Supplement: fig2-figsupp5-data1 [file elife-98593-fig2-figsupp5-data1-v1.pdf]

**B**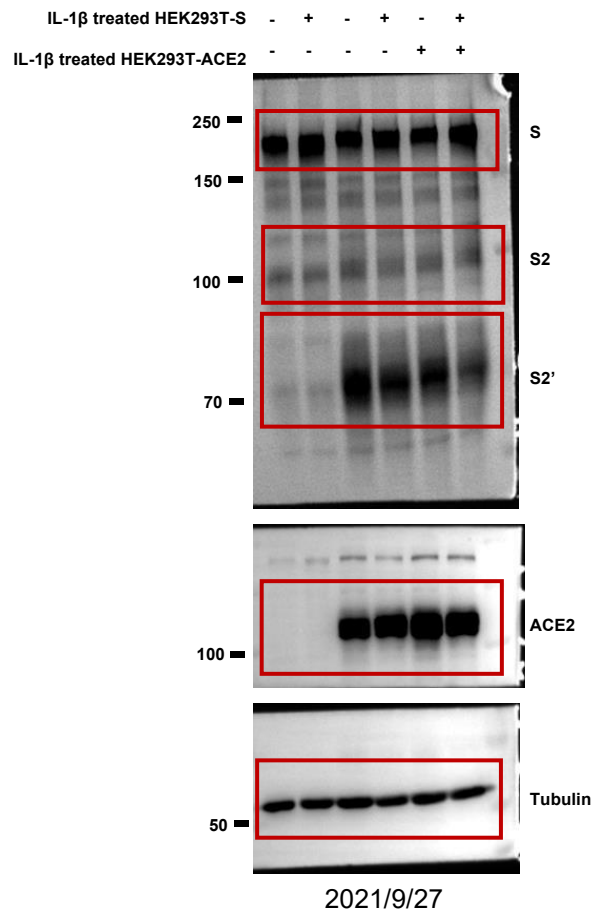**C**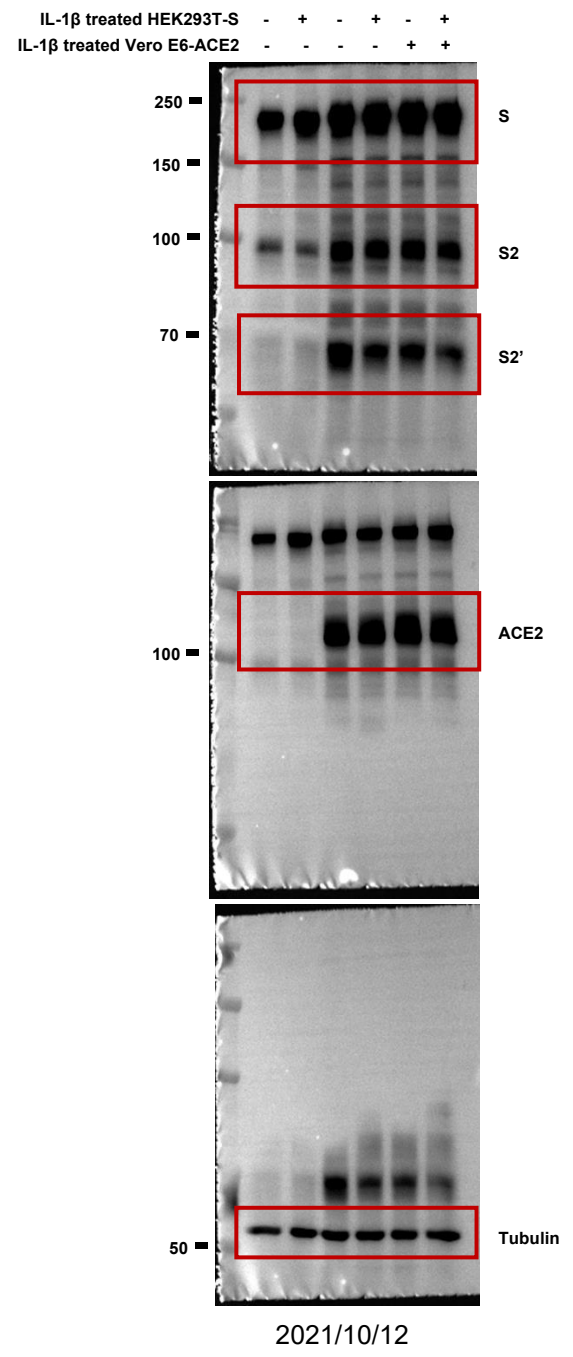

D

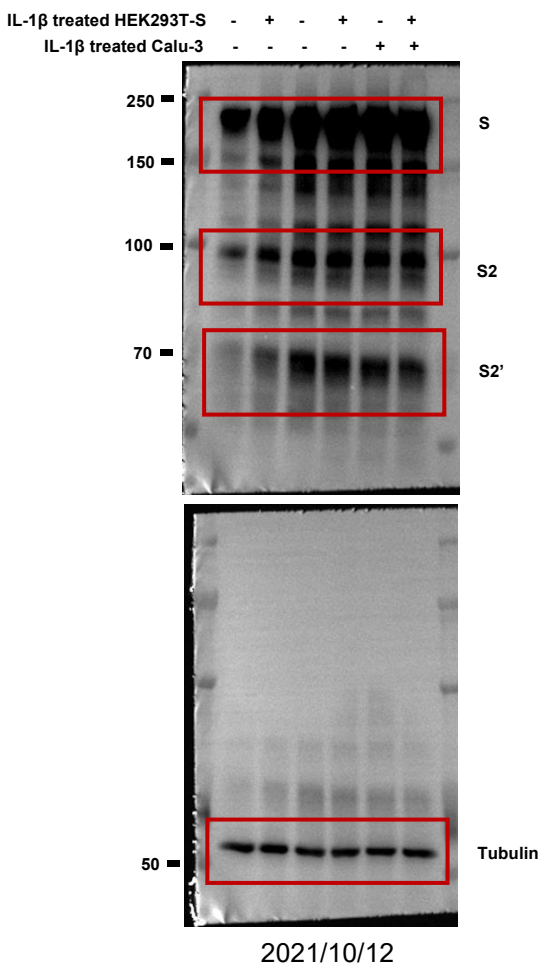

Figure 2–Figure Supplement 5–Source Data 1. Original membranes corresponding to Figure 2–Figure Supplement 5B, Figure 2–Figure Supplement 5C and Figure 2–Figure Supplement 5D.
