# Supplementary material for: Interleukin-1 prevents SARS-CoV-2-induced membrane fusion to restrict viral transmission via induction of actin bundles
Source: eLife journal article supplement (doi:10.7554/elife.98593), 2024-07-16
Supplement: fig3-figsupp1-data1 [file elife-98593-fig3-figsupp1-data1-v1.pdf]

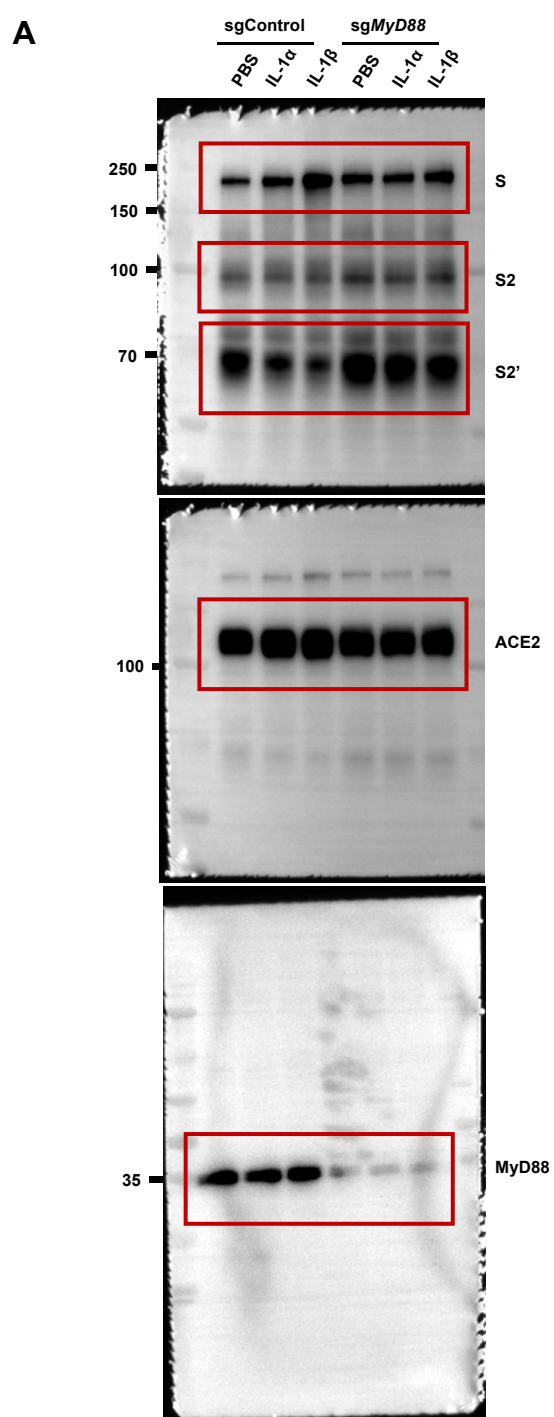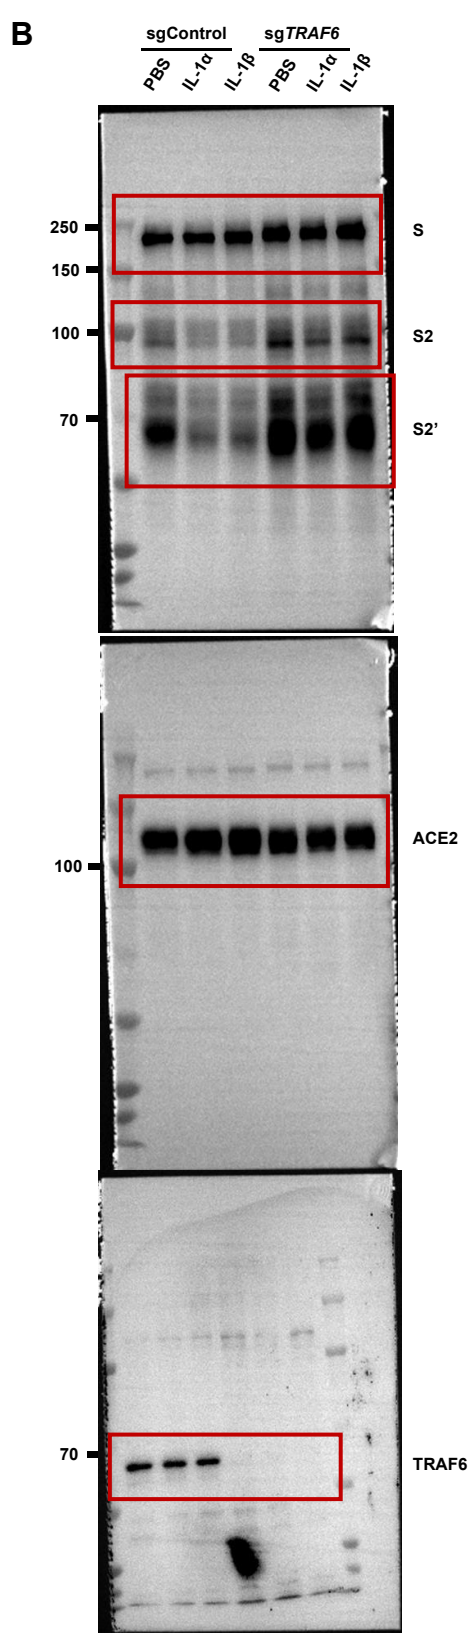

**A**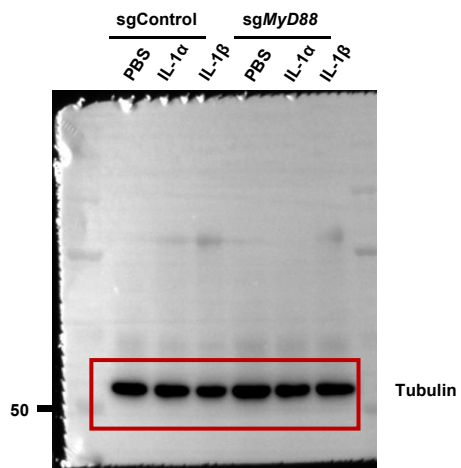

2022/8/5

**B**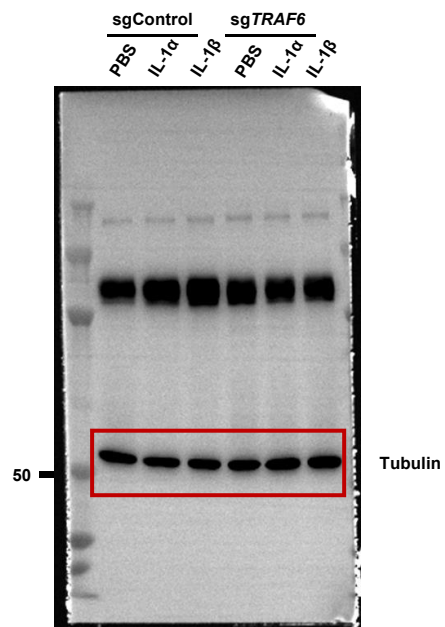

2022/7/28

**Figure 3–Figure Supplement 1–Source Data 1.** Original membranes corresponding to Figure 3–Figure Supplement 1A and Figure 3–Figure Supplement 1B.
