# Supplementary material for: Interleukin-1 prevents SARS-CoV-2-induced membrane fusion to restrict viral transmission via induction of actin bundles
Source: eLife journal article supplement (doi:10.7554/elife.98593), 2024-07-16
Supplement: fig3-figsupp2-data1 [file elife-98593-fig3-figsupp2-data1-v1.pdf]

**A**

|                       | sgControl |   |   | sgMAP3K7 |   |   |
|-----------------------|-----------|---|---|----------|---|---|
| HEK293T-ACE2          | -         | + | + | -        | + | + |
| IL-1 $\beta$ (1ng/mL) | -         | - | + | -        | - | + |

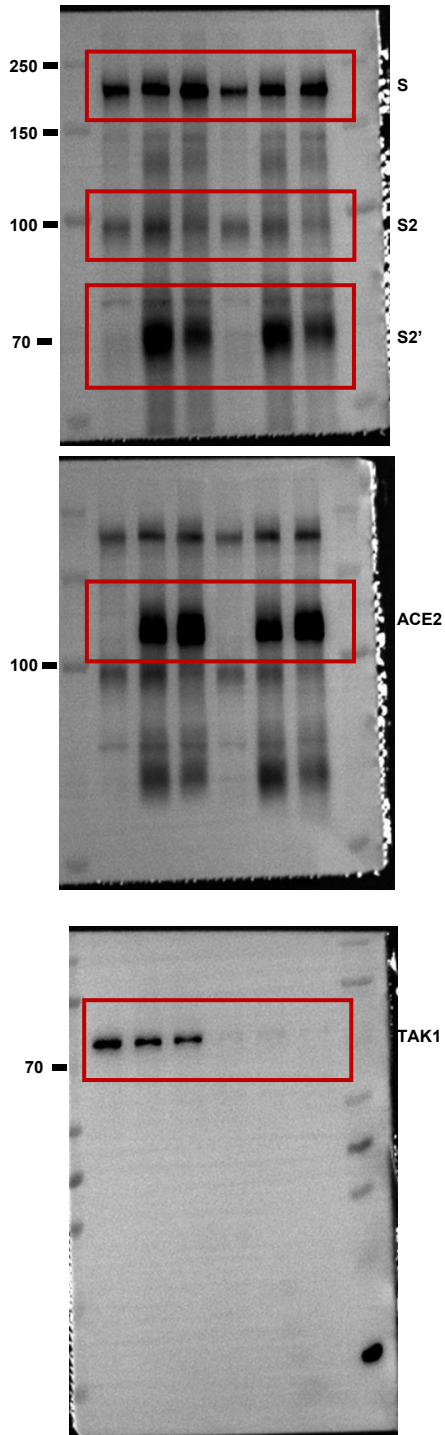**B**

| HEK293T-ACE2          | - | + | +   | + | + | +   | + |
|-----------------------|---|---|-----|---|---|-----|---|
| TPCA1 ( $\mu$ M)      | 0 | 0 | 0.5 | 1 | 0 | 0.5 | 1 |
| IL-1 $\beta$ (1ng/mL) | - | - | -   | - | + | +   | + |

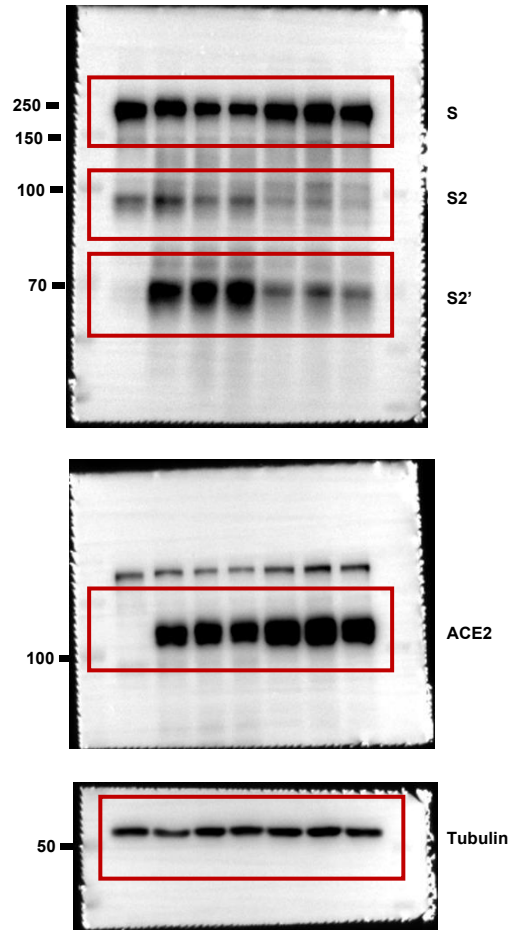

2022/9/21

**A**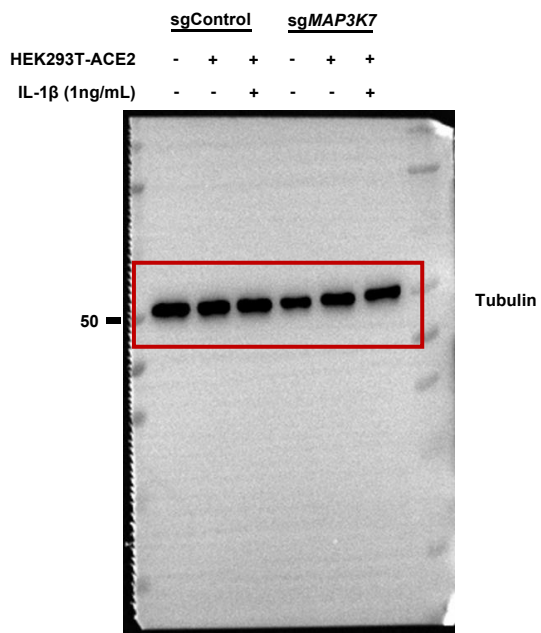

2022/3/25
