# Supplementary material for: Interleukin-1 prevents SARS-CoV-2-induced membrane fusion to restrict viral transmission via induction of actin bundles
Source: eLife journal article supplement (doi:10.7554/elife.98593), 2024-07-16
Supplement: fig5-data1 [file elife-98593-fig5-data1-v1.pdf]

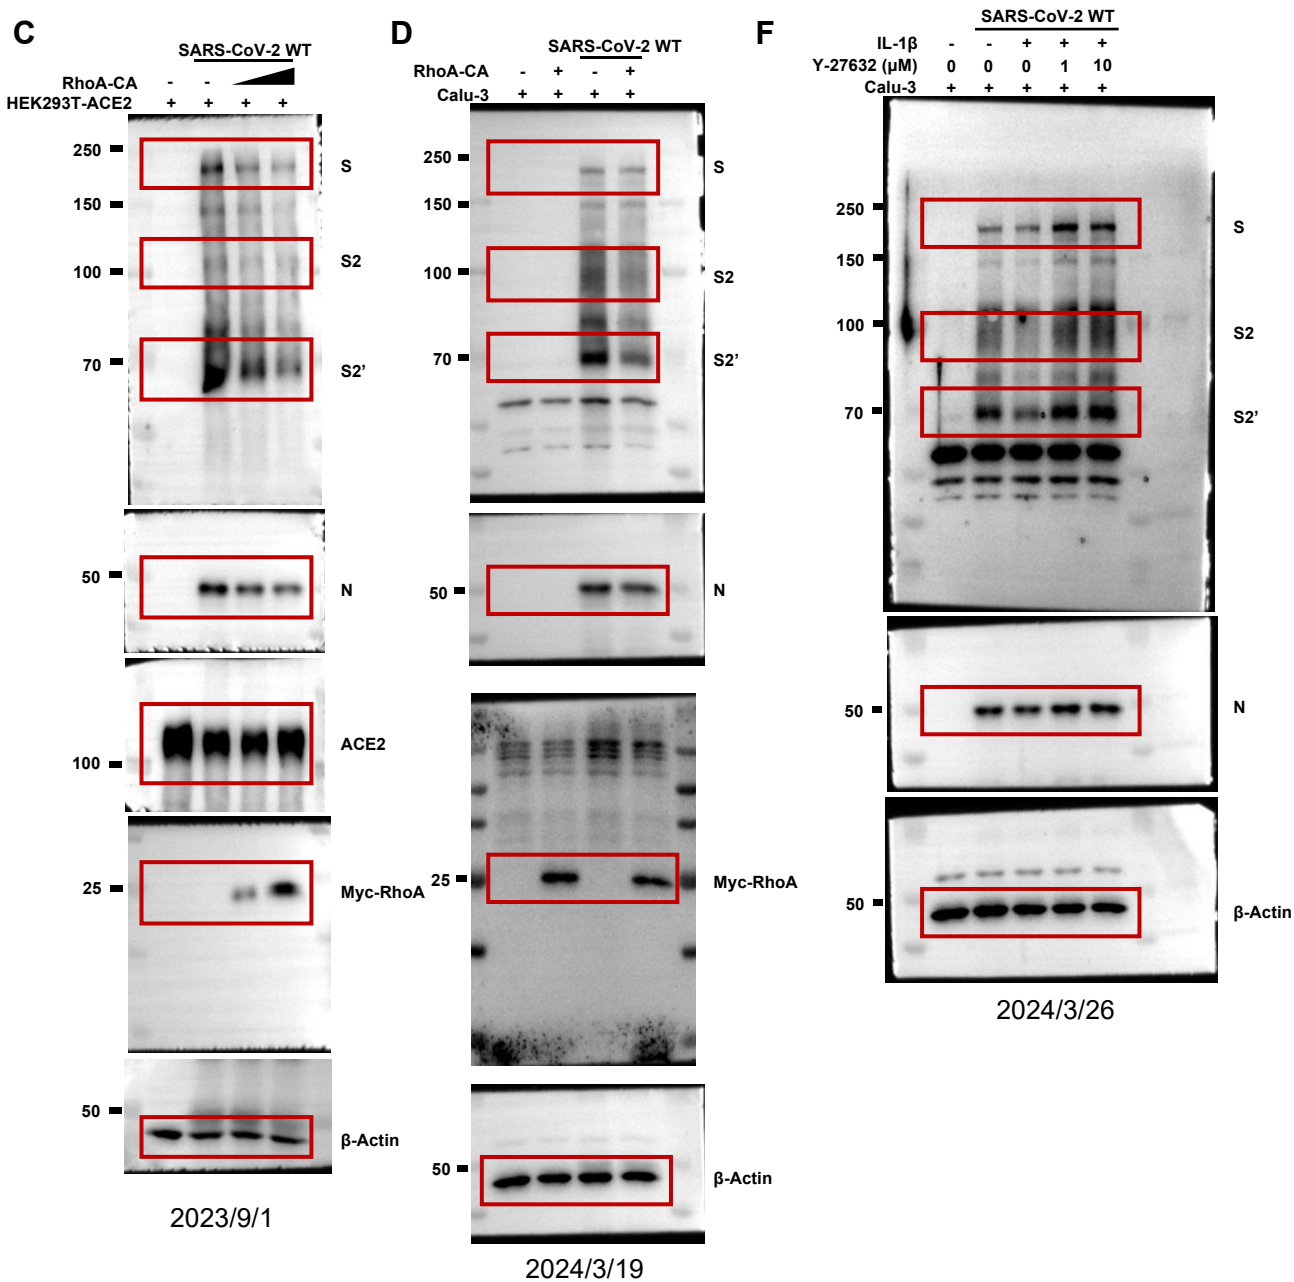

**G**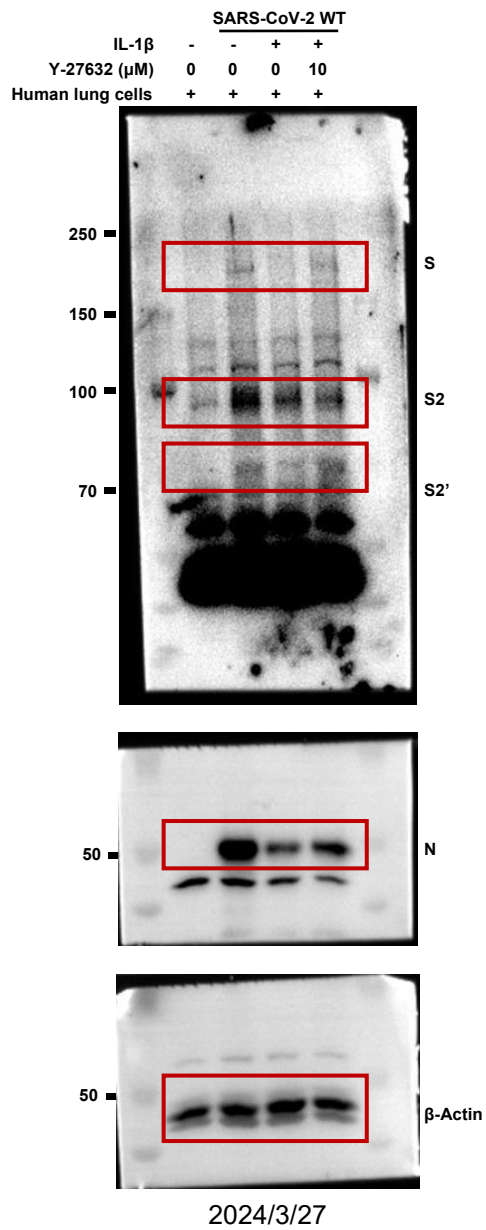

**Figure 5-Source Data 1.** Original membranes corresponding to Figure 5C, Figure 5D, Figure 5F and Figure 5G.
