# Supplementary material for: Interleukin-1 prevents SARS-CoV-2-induced membrane fusion to restrict viral transmission via induction of actin bundles
Source: eLife journal article supplement (doi:10.7554/elife.98593), 2024-07-16
Supplement: fig5-figsupp3-data1 [file elife-98593-fig5-figsupp3-data1-v1.pdf]

**E**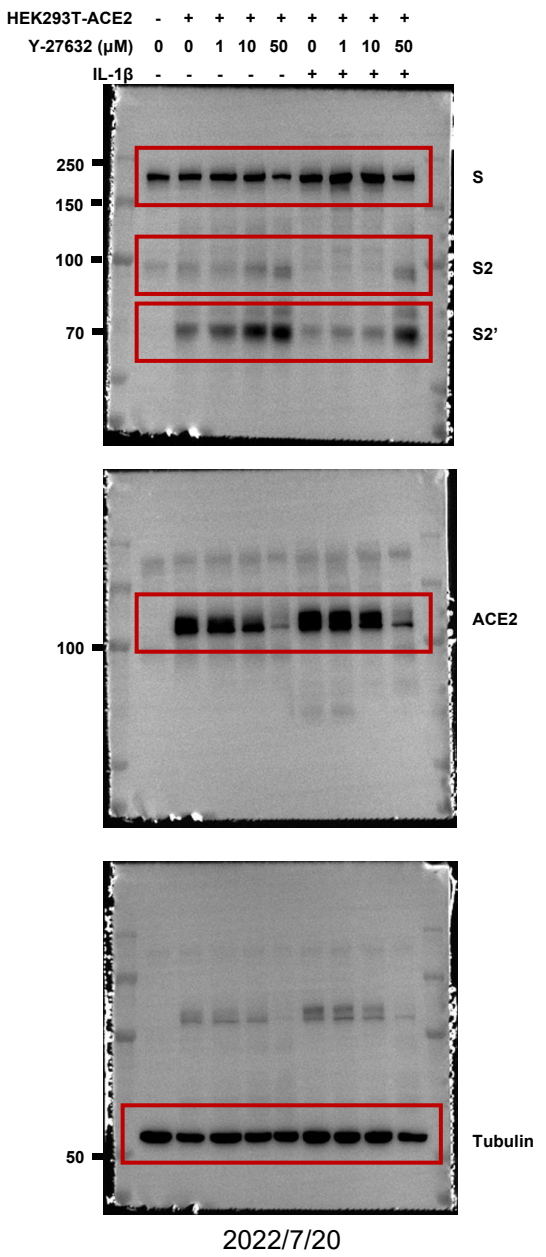**F**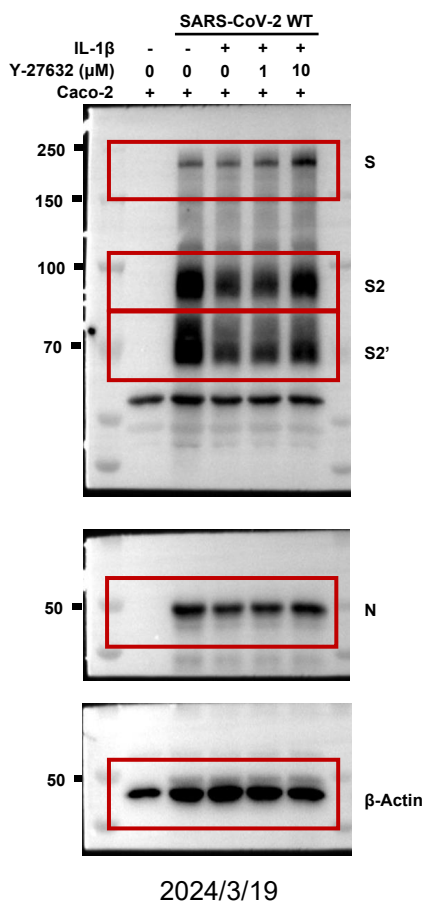

**Figure 5—Figure Supplement 3—Source Data 1.** Original membranes corresponding to Figure 5—Figure Supplement 3E and Figure 5—Figure Supplement 3F.
