# Supplementary material for: Interleukin-1 prevents SARS-CoV-2-induced membrane fusion to restrict viral transmission via induction of actin bundles
Source: eLife journal article supplement (doi:10.7554/elife.98593), 2024-07-16
Supplement: fig6-data1 [file elife-98593-fig6-data1-v1.pdf]

**G**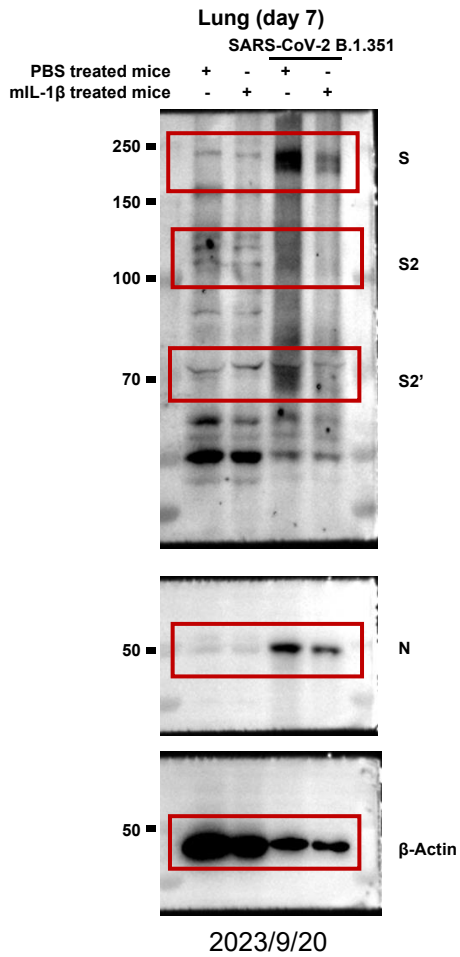

Figure 6-Source Data 1. Original membranes corresponding to Figure 6G.
