# Supplementary material for: Interleukin-1 prevents SARS-CoV-2-induced membrane fusion to restrict viral transmission via induction of actin bundles
Source: eLife journal article supplement (doi:10.7554/elife.98593), 2024-07-16
Supplement: fig6-figsupp2-data1 [file elife-98593-fig6-figsupp2-data1-v1.pdf]

E

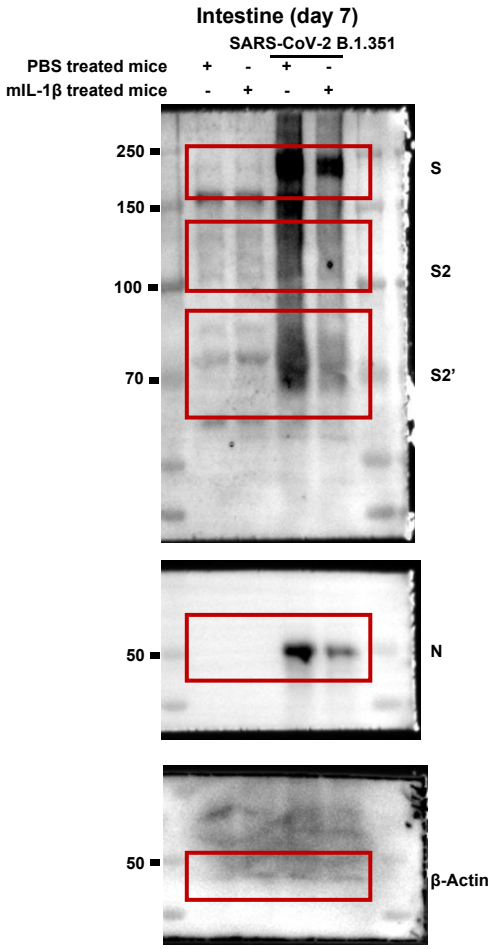

2023/9/20

Figure 6–Figure Supplement 2–Source Data 1. Original membranes corresponding to Figure 6–Figure Supplement 2E.
