# Supplementary material for: Interleukin-1 prevents SARS-CoV-2-induced membrane fusion to restrict viral transmission via induction of actin bundles
Source: eLife. 2025 Feb 12;13:RP98593. doi: 10.7554/eLife.98593 (PMC11820142; doi:10.7554/eLife.98593)
Supplement: Figure 1—figure supplement 1—source data 3. [file elife-98593-fig1-figsupp1-data3.xlsx]

## Sheet: Figure 1—figure supplement 1A
Fused area (％)	HEK293T-S
			THP-1 Supernatants
	Medium	Medium	-	LTA	Pam3CSK4	PGN	LPS
HEK293T-ACE2	-	+	+	+	+	+	+
2021/8/13 P1	0	19.499	25.117	12.689	12.069	11.879	11.405
2021/8/13 P2	0	20.542	22.421	13.244	10.245	10.916	11.542
2021/8/13 P3	0	24.547	23.125	14.542	13.421	13.682	13.452

## Sheet: Figure 1—figure supplement 1B
RLU (％ to control)	HEK293T-S
	-	-	LTA	Pam3CSK4	PGN	LPS
HEK293T-ACE2	-	+	+	+	+	+
2021-08-01	0.503876	100	109.496	101.008	101.744	107.791
2021-08-04	0.324564	100	104.47	105.2	104.927	96.3167
2021-08-07	0.226226	100	92.7132	107.731	109.341	113.76
2023-03-25	0.489044	100	92.949	94.3967	100.061	105.852

## Sheet: Figure 1—figure supplement 1E
Fused area (％)	HEK293T-S
	-	-	LTA	Pam3CSK4	PGN	LPS
HEK293T-ACE2	-	+	+	+	+	+
2023/3/31 P1	0	23.959	28.079	27.55	26.052	24.845
2023/3/31 P2	0	26.548	25.425	25.499	29.546	26.251
2023/3/31 P3	0	24.254	20.945	23.124	22.334	21.245

## Sheet: Figure 1—figure supplement 1F
RLU (％ to control)	HEK293T-S
			PBMCs Supernatants
	Medium	Medium	-	LTA	Pam3CSK4	PGN	LPS
HEK293T-ACE2	-	+	+	+	+	+	+
2021/12/3 P1	0.279399	100	119.174	/	80.3151	55.9692	81.5009
2021/12/3 P2	0.160609	100	104.153	88.2028	89.3719	65.8718	92.0326
2021/12/3 P3	0.109093	100	110.951	87.1479	80.4978	74.7332	81.5603
2021/12/4 P1	6.31891	100	69.7956	59.3697	59.8157	57.1419	84.3125
2022/07/13 P1	2.68807	100	78.485	70.4064	60.0819	62.8874	66.7806
2022/07/13 P2	3.14393	100	90.6138	76.2032	60.4722	53.4024	62.1753

## Sheet: Figure 1—figure supplement 1I
Fused area (％)	HEK293T-S
			PBMCs Supernatants
	Medium	Medium	-	LTA	Pam3CSK4	PGN	LPS
HEK293T-ACE2	-	+	+	+	+	+	+
2022/8/4 P1	0	17.231	16.394	9.429	10.311	10.552	7.156
2022/8/4 P2	0	19.251	15.652	10.325	10.984	9.321	9.256
2022/8/4 P3	0	16.452	17.669	8.652	8.261	9.896	10.328
