# Supplementary material for: Interleukin-1 prevents SARS-CoV-2-induced membrane fusion to restrict viral transmission via induction of actin bundles
Source: eLife. 2025 Feb 12;13:RP98593. doi: 10.7554/eLife.98593 (PMC11820142; doi:10.7554/eLife.98593)
Supplement: Figure 1—source data 3. [file elife-98593-fig1-data3.xlsx]

## Sheet: Figure 1B
RLU (％ to control)	HEK293T-S
			THP-1 Supernatants
	Medium	Medium	-	LTA	Pam3CSK4	PGN	LPS
HEK293T-ACE2	-	+	+	+	+	+	+
2021/7/29 P1	0.368059	100	104.129	49.6711	56.6518	47.5596	66.5546
2021/7/29 P2	0.318979	100	99.7874	38.8324	26.8251	45.0647	71.664
2021/8/1 P1	0.976024	100	79.4399	74.975	68.8199	53.0872	77.5939
2021/8/5 P1	0.568652	100	95.4001	67.0716	59.3886	49.1151	69.2229
2021/8/5 P2	0.627589	100	87.5038	62.5373	62.112	47.5905	67.2188
2021/8/5 P3	0.694788	100	116.241	71.9887	73.7172	31.5563	49.1956
2021/8/7 P1		100	123.721			71.3547
2021/8/7 P2		100	118.362			55.7766
2021/8/11 P1		100	119.863			63.3746
2021/8/11 P2		100	106.655			73.3944

## Sheet: Figure 1I
Infected area (％)	SARS-CoV-2WT
		THP-1 Supernatants
	Medium	-	LTA	Pam3CSK4	PGN
Caco-2	+	+	+	+	+
2023/9/12 P1	1.954	1.947	0.598	0.268	0.198
2023/9/12 P2	2.124	1.878	0.245	0.145	0.219
2023/9/12 P3	2.541	1.975	0.354	0.425	0.398
