# Supplementary material for: Interleukin-1 prevents SARS-CoV-2-induced membrane fusion to restrict viral transmission via induction of actin bundles
Source: eLife. 2025 Feb 12;13:RP98593. doi: 10.7554/eLife.98593 (PMC11820142; doi:10.7554/eLife.98593)
Supplement: Figure 2—figure supplement 1—source data 1. [file elife-98593-fig2-figsupp1-data1.xlsx]

## Sheet: Figure 2—figure supplement 1A
2021-12-01
Relative expression (to GADPH)	IL1A
	-	LTA	Pam3CSK4	PGN	LPS
	4.23653e-05	0.0179366	0.033737	0.0313246	0.00190237
	5.20489e-05	0.0158552	0.0322389	0.0317486	0.00210544
	3.93105e-05	0.016344	0.0323383	0.0326894	0.00208225
	IL1B
	-	LTA	Pam3CSK4	PGN	LPS
	0.0111306	1.14291	2.4248	2.86805	0.139628
	0.00945644	1.15891	2.53135	2.83522	0.145592
	0.00430159	1.18568	2.45804	3.00555	0.146315
	IL4
	-	LTA	Pam3CSK4	PGN	LPS
	nd	nd	nd	nd	nd
	nd	nd	nd	nd	nd
	nd	nd	nd	nd	nd
	IL6
	-	LTA	Pam3CSK4	PGN	LPS
	2.18317e-05	0.00165654	0.0032008	0.00240416	0.000868135
	2.31198e-05	0.00141345	0.00257577	0.00245645	0.000603025
	7.06142e-05	0.00158021	0.00316659	0.00247267	0.00112555
	IL8
	-	LTA	Pam3CSK4	PGN	LPS
	0.0230181	1.36672	3.06454	4.09737	0.324263
	0.0207967	1.1496	2.73526	3.27919	0.301909
	0.0203464	1.03447	2.64011	3.0736	0.297054
	IL12A
	-	LTA	Pam3CSK4	PGN	LPS
	9.33728e-05	7.69607e-05	7.96384e-05	6.92656e-05	0.000111138
	0.000103814	8.27509e-05	0.000133164	9.44845e-05	6.74656e-05
	8.89517e-05	8.20482e-05	7.62138e-05	5.00632e-05	5.74524e-05
	IFNA1
	-	LTA	Pam3CSK4	PGN	LPS
	0.000110567	0.000251083	0.000170269	0.000169599	0.000122173
	0.000101611	0.000219676	0.000202608	0.000211084	0.00012974
	0.000173123	0.000133622	0.000125481	0.000209895	0.000102537
	IFNA2
	-	LTA	Pam3CSK4	PGN	LPS
	nd	nd	nd	nd	nd
	nd	nd	nd	nd	nd
	nd	nd	nd	nd	nd
	IFNB1
	-	LTA	Pam3CSK4	PGN	LPS
	0.000686866	0.000890536	0.00110999	0.00061766	0.000653076
	0.000674413	0.000630014	0.000834511	0.000513962	0.000697225
	0.000682103	0.000644538	0.000927686	0.000607755	0.000571246
	IFNG
	-	LTA	Pam3CSK4	PGN	LPS
	4.49482e-05	4.83425e-05	9.54043e-05	0.00016563	7.24624e-05
	0.000104454	0.00012584	6.51402e-05	0.000144337	5.93921e-05
	4.27761e-05	0.000119472	8.08771e-05	7.27251e-05	3.61671e-05

## Sheet: Figure 2—figure supplement 1B
2021-12-02
Relative expression (to GADPH)	IL1R1	IL2RA	IL4R	IL6ST	IL8RA	IL12RB1	IFNAR1	IFNGR1
	0.000667547	nd	0.000745201	0.0275656	0.000353977	nd	0.0208225	0.014409
	0.000330055	nd	0.000719157	0.026891	0.000151063	nd	0.0127613	0.00779411
	0.000486669	nd	0.000721633	0.0286005	0.000113539	nd	0.0148173	0.00943368
	0.000376419	nd	0.000561893	0.0199507	0.000376217	nd	0.0162459	0.0127367
	0.000556964	nd	0.00048936	0.0241406	0.000417588	nd	0.0180392	0.0160101
	0.000494924	nd	0.000487083	0.0229248	0.000299221	nd	0.0215756	0.0150986
	0.000364001	nd	0.00070237	0.0275691	0.000162115	nd	0.0127474	0.0069196
	0.00042553	nd	0.000515234	0.0301526	0.000225998	nd	0.0154253	0.00922481
	0.000377354	nd	0.000449575	0.0280962	0.000446832	nd	0.0154889	0.013579
	0.000412594	nd	0.000406449	0.0243639	0.000382661	nd	0.0178404	0.0160397
	0.000575795	nd	0.000528544	0.0273353	0.000305331	nd	0.0208259	0.0153067
	0.000414072	nd	0.000706304	0.0248506	0.000158326	nd	0.0124661	0.00657457
	0.000475409	nd	0.000676461	0.0300543	0.0001625	nd	0.0142373	0.00958681
	0.000350391	nd	0.000553807	0.0323349	0.000411198	nd	0.016112	0.0133762
	0.000509124	nd	0.000446986	0.033358	0.000369512	nd	0.0170073	0.0148272

## Sheet: Figure 2—figure supplement 1D
Fused area (％)	HEK293T-S
Cytokines	-	-	IL-1α	IL-1β	IL-6	IL-8
HEK293T-ACE2	-	+	+	+	+	+
2023/5/30 P1	0	28.107	15.23	13.387	38.546	29.04
2023/5/30 P2	0	25.245	13.354	12.365	30.65	30.316
2023/5/30 P3	0	26.364	12.315	11.326	28.621	32.698
