# Supplementary material for: Interleukin-1 prevents SARS-CoV-2-induced membrane fusion to restrict viral transmission via induction of actin bundles
Source: eLife. 2025 Feb 12;13:RP98593. doi: 10.7554/eLife.98593 (PMC11820142; doi:10.7554/eLife.98593)
Supplement: Figure 2—figure supplement 2—source data 3. [file elife-98593-fig2-figsupp2-data3.xlsx]

## Sheet: Figure 2—figure supplement 2A
RLU (％ to control)	HEK293T-S
IL-1α	0	0	0.1	1	10	100
HEK293T-ACE2	-	+	+	+	+	+
2022/07/13 P1	2.68807	100	78.485	70.4064	60.0819	62.8874
2022/07/13 P2	3.14393	100	90.6138	76.2032	60.4722	53.4024
2023/05/28 P1	2.07896	100	82.6035	73.41	64.9383	63.3528
2023/05/28 P2	2.52146	100	92.8116	78.0513	63.9546	58.6455

## Sheet: Figure 2—figure supplement 2D
Fused area (％)	HEK293T-S
IL-1β	0	0	0.1	1	10	100
HEK293T-ACE2	-	+	+	+	+	+
2023/5/28 P1	0	33.908	16.407	16.454	11.651	14.217
2023/5/28 P2	0	30.242	20.261	15.146	15.355	10.212
2023/5/28 P3	0	27.421	17.19	13.142	12.428	12.129

## Sheet: Figure 2—figure supplement 2E
Fused area (％)	HEK293T-S
IL-1α	0	0	0.1	1	10	100
HEK293T-ACE2	-	+	+	+	+	+
2023/5/28 P1	0	28.828	19.961	19.026	13.406	13.452
2023/5/28 P2	0	30.254	24.221	17.546	15.451	12.548
2023/5/28 P3	0	33.125	20.987	23.424	11.128	11.549

## Sheet: Figure 2—figure supplement 2F
RLU (％ to control)	HEK293T-S
	-	-	IL-1α	IL-1β	IL-1α+IL-1β
HEK293T-ACE2	-	+	+	+	+
2023/5/28 P1	0.62062	100	53.7912	56.1374	56.2675
2023/5/28 P2	0.833782	100	51.5652	49.6554	52.6997
2023/5/28 P3	0.828872	100	52.2828	54.5737	54.7694

## Sheet: Figure 2—figure supplement 2H
Fused area (％)	HEK293T-S
	-	-	IL-1α	IL-1β	IL-1α+IL-1β
HEK293T-ACE2	-	+	+	+	+
2023/5/28 P1	0	26.689	12.906	11.813	14.389
2023/5/28 P2	0	30.249	15.219	14.65	12.549
2023/5/28 P3	0	32.105	11.054	11.356	11.29
