# Supplementary material for: Interleukin-1 prevents SARS-CoV-2-induced membrane fusion to restrict viral transmission via induction of actin bundles
Source: eLife. 2025 Feb 12;13:RP98593. doi: 10.7554/eLife.98593 (PMC11820142; doi:10.7554/eLife.98593)
Supplement: Figure 2—figure supplement 4—source data 3. [file elife-98593-fig2-figsupp4-data3.xlsx]

## Sheet: Figure 2—figure supplement 4A
IL-1β (pg/mL)	THP-1 Supernatants
	-	LTA	Pam3CSK4	PGN	LPS
2021/10/22 P1	2	732.875	1044.79	436.546	618.059
2021/10/22 P2	2	704.742	1009.32	421.726	619.484
2021/10/22 P3	2	717.844	990.9	427.592	606.778

## Sheet: Figure 2—figure supplement 4B
IL-1β (pg/mL)	PBMCs Supernatants
	-	LTA	Pam3CSK4	PGN	LPS
2021/12/3 P1	20	136.282	115.856	9979.98	1050.5
2021/12/3 P2	20	136.282	113.595	9842.82	1000.71
2021/12/3 P3	20	109.076	379.498	7093.59	1271.64
2021/12/3 P4	20	115.856	379.498	7427.39	1298.68

## Sheet: Figure 2—figure supplement 4D
IL-1β (pg/mL)	THP-1 Supernatants
	sgcontrol THP-1				sgTLR2 THP-1
	-	LTA	Pam3CSK4	PGN	-	LTA	Pam3CSK4	PGN
2021/10/22 P1	6.68332	269.24	1154.19	737.651	5	5	5	5.17479
2021/10/22 P2	6.68332	399.416	658.789	518.796	5	5	5	5
2021/10/22 P3	5	288.383	518.764	406.415	5	5	5	5
2021/10/22 P4	5	306.175	535.76	440.524	5	5	5	5

## Sheet: Figure 2—figure supplement 4E
RLU (％ to control)	THP-1 Supernatants
	sgcontrol THP-1				sgTLR2 THP-1
	-	LTA	Pam3CSK4	PGN	-	LTA	Pam3CSK4	PGN
2021/8/11 P1	123.721	74.975	68.8199	71.3547	88.9458	80.3803	93.1146	67.776
2021/8/11 P2	118.362	67.0716	59.3886	55.7766	111.66	99.8678	108.451	102.208
2021/8/21 P1	119.863	62.5373	62.112	63.3746	107.939	107.603	102.342	99.3623
2021/8/21 P2	106.655	71.9887	73.7172	73.3944

## Sheet: Figure 2—figure supplement 4F
IL-1β (pg/mL)	THP-1 Supernatants
	-			PGN
	-	5Z-7	TPCA1	-	5Z-7	TPCA1
2021/10/22 P1	2	2	2	564.976	2.4212	12.9131
2021/10/22 P2	2.15789	2	2	552.116	2.95141	12.6482
2021/10/22 P3	6.68332	7.44238	5	556.784	8.96869	10.5045

## Sheet: Figure 2—figure supplement 4G
RLU (％ to control)	THP-1 Supernatants
	-			PGN
	-	5Z-7	TPCA1	-	5Z-7	TPCA1
2021/8/25 P1	116.951	121.561	115.651	77.5382	137.639	125.897
2021/8/25 P2	101.184	89.7226	82.8201	61.6985	106.475	61.3329
2021/8/25 P3	96.7807	106.747	99.1745	67.3475	103.798	71.5401
2021/9/7 P1	116.244	112.465	120.956	66.0061	107.923	77.1172
2021/9/7 P2	101.425	151.17	120.281	74.4857	143.476	117.039
2021/9/7 P3	123.147	99.8328	118.042	63.0727	112.528	119.41

## Sheet: Figure 2—figure supplement 4H
IL-1β (pg/mL)	PBMCs Supernatants
	-			PGN
	-	5Z-7	TPCA1	-	5Z-7	TPCA1
2021/12/3 P1	20	20	20	9367.39	20	45.0075
2021/12/3 P2	20	20	20	9645.11	20	80.858
2021/12/3 P3	20	20	20	6745.72	20	104.643
2021/12/3 P4	20	20	20	7042.65	20	160.892

## Sheet: Figure 2—figure supplement 4I
RLU (％ to control)	PBMCs Supernatants
	-			PGN
	-	5Z-7	TPCA1	-	5Z-7	TPCA1
2021/12/3 P1	117.492	127.25	107.063	73.4429	102.627	110.498
2021/12/3 P2	105.345	112.348	106.422	83.0233	101.852	113.514
2021/12/3 P3	108.636	106.78	112.461	57.9543	96.8909	105.414
