# Supplementary material for: Interleukin-1 prevents SARS-CoV-2-induced membrane fusion to restrict viral transmission via induction of actin bundles
Source: eLife. 2025 Feb 12;13:RP98593. doi: 10.7554/eLife.98593 (PMC11820142; doi:10.7554/eLife.98593)
Supplement: Figure 2—figure supplement 5—source data 3. [file elife-98593-fig2-figsupp5-data3.xlsx]

## Sheet: Figure 2—figure supplement 5B
RLU (％ to control)
IL-1β treated HEK293T-S	-	+	-	+	-	+
IL-1β treated HEK293T-ACE2	-	-	-	-	+	+
2021/9/26 P1	0.37883	0.49312	100	93.3779	82.859	82.2527
2021/9/26 P2	0.413419	0.634523	100	94.7063	89.8162	85.8043
2021/9/26 P3	0.501982	0.473499	100	83.2062	76.866	69.134
2021/9/29 P1	1.18754	1.22143	100	82.5658	86.1155	71.6068
2021/9/29 P2	0.946843	0.707186	100	84.1261	81.8553	59.051
2021/9/29 P3	0.972367	1.00757	100	76.8579	77.4026	64.5588
