# Supplementary material for: Interleukin-1 prevents SARS-CoV-2-induced membrane fusion to restrict viral transmission via induction of actin bundles
Source: eLife. 2025 Feb 12;13:RP98593. doi: 10.7554/eLife.98593 (PMC11820142; doi:10.7554/eLife.98593)
Supplement: Figure 2—figure supplement 6—source data 3. [file elife-98593-fig2-figsupp6-data3.xlsx]

## Sheet: Figure 2—figure supplement 6B
Fused area (％)	HEK293T-S
	-	HEK293T-ACE2		-	Vero E6-ACE2		-	Calu-3
IL-1β	-	-	+	-	-	+	-	-	+
2021/10/19 P1	0	22.342	8.761	0	29.074	14.504	0	14.808	6.74
2021/10/19 P2	0	26.645	10.545	0	32.541	18.785	0	15.355	9.645
2021/10/19 P3	0	24.487	13.258	0	36.342	15.69	0	18.561	7.698

## Sheet: Figure 2—figure supplement 6C
RLU (％ to control)	HEK293T-S-Alpha			HEK293T-S-Beta			HEK293T-S-Delta				HEK293T-S-Omicron
	-	-	IL-1β	-	-	IL-1β	-	-	IL-1β		-	-	IL-1β
HEK293T-ACE2	-	+	+	-	+	+	-	+	+		-	+	+
2021/9/22 P1	1.16112	100	77.4171	0.7262	100	58.8175	1.45588	100	64.711	2022/10/26 P1	0.486015	100	71.4902
2021/9/22 P2	2.53108	100	81.7448	1.07162	100	58.079	3.12744	100	78.4761	2022/10/26 P2	0.468384	100	60.8647
2021/9/24 P1	1.23938	100	80.1666	0.969537	100	64.6599	3.20319	100	71.4815	2022/11/02 P1	0.475758	100	65.5424
2021/9/24 P2						64.6352			66.4515
