# Supplementary material for: Interleukin-1 prevents SARS-CoV-2-induced membrane fusion to restrict viral transmission via induction of actin bundles
Source: eLife. 2025 Feb 12;13:RP98593. doi: 10.7554/eLife.98593 (PMC11820142; doi:10.7554/eLife.98593)
Supplement: Figure 2—figure supplement 7—source data 3. [file elife-98593-fig2-figsupp7-data3.xlsx]

## Sheet: Figure 2—figure supplement 7B
RLU (％ to control)	HEK293T--SARS-S
IL-1β	-	-	+
HEK293T-ACE2	-	+	+
2023/4/19 P1	0.247489	100	60.2125
2023/4/19 P2	5.38222	100	66.209
2023/4/22 P1	0.132228	100	64.9418
2023/4/22 P2	9.21083	100	59.6058
2023/4/25 P1	5.39877	100	64.4417
2023/4/25 P2	3.43503	100	69.5328

## Sheet: Figure 2—figure supplement 7C
RLU (％ to control)	HEK293T--MERS-S
IL-1β	-	-	+
HEK293T-DPP4	-	+	+
2023/4/14 P1	3.84689	100	76.6462
2023/4/14 P2	3.70441	100	78.6839
2023/4/19 P1	2.17573	100	68.4323
2023/4/19 P2	3.24747	100	78.2936
2023/4/25 P1	1.23095	100	80.0796
2023/4/25 P2	1.13004	100	75.5157

## Sheet: Figure 2—figure supplement 7G
Fused area (％)	HEK293T-SARS-S			HEK293T-MERS-S
IL-1β	-	-	+	-	-	+
HEK293T-ACE2	-	+	+	-	-	-
HEK293T-DPP4	-	-	-	-	+	+
2023/4/25 P1	0	2.098	0.956	0	12.6	5.105
2023/4/25 P2	0	3.126	1.215	0	10.468	4.639
2023/4/25 P3	0	2.546	0.865	0	9.68	4.98
