# Supplementary material for: Interleukin-1 prevents SARS-CoV-2-induced membrane fusion to restrict viral transmission via induction of actin bundles
Source: eLife. 2025 Feb 12;13:RP98593. doi: 10.7554/eLife.98593 (PMC11820142; doi:10.7554/eLife.98593)
Supplement: Figure 2—source data 3. [file elife-98593-fig2-data3.xlsx]

## Sheet: Figure 2B
RLU (％ to control)	HEK293T-S
Cytokines	-	-	IL-1α	IL-1β	IL-6	IL-8
HEK293T-ACE2	-	+	+	+	+	+
2021/9/1 P1	0.258687	100		70.4325	114.241
2021/9/1 P2	0.454759	100		55.5948	86.9065
2021/9/7 P1	0.823187	100		73.5544	110.527
2021/9/7 P2	1.41775	100			107.336
2021/9/4 P1	0.419112	100			102.947
2021/9/4 P2	0.615144	100			105.305
2021/9/10 P1	0.567845	100				93.6334
2021/9/10 P2	0.181255	100				101.684
2021/9/10 P3	0.277195	100				89.3564
2021/9/13 P1	0.353718	100				107.992
2021/9/13 P2	0.184812	100				102.718
2021/12/7 P1		100		66.4164
2021/12/7 P2		100		62.9584
2021/12/7 P3		100		54.4788
2022/7/13 P1	2.68807	100	57.3299
2022/7/13 P2	3.14393	100	61.4656
2022/7/31 P1		100	74.0191
2022/7/31 P2		100	57.8066
2022/7/31 P3		100	74.8951
2022/7/31 P4		100	57.1881
2022/8/04 P1		100	74.8096
2022/8/04 P2		100	71.6685
2023/5/25 P1	0.864933	100		66.2196
2023/5/25 P2	1.06595	100		58.7329
2023/5/25 P3	0.793438	100		69.8504

## Sheet: Figure 2C
RLU (％ to control)	HEK293T-S
IL-1β (ng/mL)	0	0	0.1	1	10	100
HEK293T-ACE2	-	+	+	+	+	+
2023/5/10 P1	1.68267	100	75.7014	45.5834	52.0533	55.9606
2023/5/10 P2	2.01885	100	67.7021	54.5924	48.4698	42.3656
2023/5/10 P3	2.00194	100	64.3664	51.1592	49.7929	49.1111
2023/5/28 P1	0.711139	100	73.0562	56.3397	53.3898	55.0823
2023/5/28 P2	0.553688	100	70.2629	53.4039	51.719	52.1151
2023/5/28 P3	0.991732	100	78.7124	61.7945	54.3309	55.5591

## Sheet: Figure 2I
Infected area (％)	SARS-CoV-2 WT
	PBS	IL-1β
Caco-2	+	+
2023/9/4 P1	1.776	0.353
2023/9/4 P2	2.146	0.457
2023/9/4 P3	1.955	0.241

## Sheet: Figure 2J
RLU (％ to control)	HEK293T-S
THP-1 supernatants	-	-	PGN	PGN
IL-1RA	-	+	-	+
HEK293T-ACE2	+	+	+	+
2024/6/24 P1	103.752	103.383	56.3328	88.7758
2024/6/24 P2	95.8019	106.145	50.3199	75.9861
2024/8/2 P1	101.954	94.6869	58.0793	73.6101
2024/8/2 P2	96.1553	99.9581	61.1844	74.4692
