# Supplementary material for: Interleukin-1 prevents SARS-CoV-2-induced membrane fusion to restrict viral transmission via induction of actin bundles
Source: eLife. 2025 Feb 12;13:RP98593. doi: 10.7554/eLife.98593 (PMC11820142; doi:10.7554/eLife.98593)
Supplement: Figure 3—figure supplement 2—source data 3. [file elife-98593-fig3-figsupp2-data3.xlsx]

## Sheet: Figure 3—figure supplement 2A
RLU (％ to control)	HEK293T-S
	sgControl			sgMAP3K7
IL-1β	-	-	+	-	-	+
HEK293T-ACE2	-	+	+	-	+	+
2022/3/13 P1	1.01193	100	56.8905	1.11669	97.5636	53.0704
2022/3/13 P2	1.10951	100	55.6967	1.53162	88.0831	52.2175
2022/3/27 P1	1.23348	100	61.2931	1.309	134.643	74.4185
2022/3/27 P2	1.99615	100	56.4727	1.67148	115.189	65.5588
2022/3/27 P3	1.24764	100	56.06	1.46188	120.895	73.2889

## Sheet: Figure 3—figure supplement 2B
RLU (％ to control)	HEK293T-S
TPCA1	0	0	0.5	1	0	0.5	1
IL-1β	-	-	-	-	+	+	+
HEK293T-ACE2	-	+	+	+	+	+	+
2022/9/20 P1	1.53289	100	97.2917	95.6168	61.1881	60.7473	61.4575
2022/10/11 P1	1.20203	100	114.904	107.365	59.8372	40.6459	49.8065
2022/10/11 P2	1.48907	100	114.634	95.6797	56.1235	39.3891	47.1541

## Sheet: Figure 3—figure supplement 2C
2022-03-27
Relative expression (to GADPH)	RELB		NFKB1		NFKBIA
	PBS	IL-1β	PBS	IL-1β	PBS	IL-1β
	3.36169e-05	0.000435676	0.0065191	0.0150914	0.0226447	0.180121
	6.28888e-05	0.000317569	0.00652614	0.014045	0.0237403	0.142395
	3.8572e-05	0.00041722	0.0061871	0.0144752	0.0230614	0.138204
	4.56747e-05	0.000548298	0.0047188	0.00865318	0.0131012	0.131883
	0.000100833	0.0003939	0.00483132	0.00900532	0.0122018	0.133373
	7.86722e-05	0.000480113	0.00481892	0.00865651	0.0130004	0.129068
	3.62194e-05	0.000896058	0.00601738	0.0137064	0.0152328	0.135101
	5.55194e-05	0.000687426	0.00583731	0.0149757	0.0149723	0.138377
	4.10339e-05	0.00064176	0.00562725	0.0133654	0.015234	0.127235

## Sheet: Figure 3—figure supplement 2D
RLU (％ to control)	HEK293T-S
	sgControl		sgRELB		sgNFKB1		sgNFKBIA
IL-1β	-	+	-	+	-	+	-	+
HEK293T-ACE2	+	+	+	+	+	+	+	+
2022/7/4 P1	100	36.6299	100	34.8003	100	39.3933	100	34.9125
2022/7/4 P2	100	55.1166	100	44.1924	100	38.3833	100	41.6207
2022/7/8 P1	100	43.0513	100	52.4695	100	31.1362	100	43.5201
2022/7/8 P2	100	46.8668	100	58.5316	100	35.3675	100	62.1011
