# Supplementary material for: Interleukin-1 prevents SARS-CoV-2-induced membrane fusion to restrict viral transmission via induction of actin bundles
Source: eLife. 2025 Feb 12;13:RP98593. doi: 10.7554/eLife.98593 (PMC11820142; doi:10.7554/eLife.98593)
Supplement: Figure 3—source data 3. [file elife-98593-fig3-data3.xlsx]

## Sheet: Figure 3B
RLU (％ to control)	HEK293T-S
IL-1RA	-	-	+	-	+
IL-1β	-	-	-	+	+
HEK293T-ACE2	-	+	+	+	+
2022/7/30 P1	0.0130577	100	103.259	40.9483	80.1502
2022/7/30 P2	0.00942716	100	77.3132	40.3422	76.057
2022/7/30 P3	0.00922315	100	77.749	39.7432	75.1008
2023/3/23 P1	0.835571	100	106.344	49.4539	98.753
2023/3/25 P1	0.710947	100	97.6895	46.2164	89.8463

## Sheet: Figure 3C
RLU (％ to control)	HEK293T-S
	sgControl			sgMyD88
	PBS	IL-1α	IL-1β	PBS	IL-1α	IL-1β
HEK293T-ACE2	+	+	+	+	+	+
2022/07/26 P1	100	50.5486	45.4642	100	98.8826	86.4726
2022/07/26 P2	100	46.917	51.1842	100	87.6222	89.5147
2022/07/29 P1	100	38.2249	38.9553	100	88.8443	97.7648
2022/07/29 P2	100	40.339	42.8673	100	100.625	107.922

## Sheet: Figure 3D
RLU (％ to control)	HEK293T-S
IRAK1/4 inhibitor	-	-	+	-	+
IL-1β	-	-	-	+	+
HEK293T-ACE2	-	+	+	+	+
2022/8/3 P1	0.00955718	100	83.9395	55.6961	90.0287
2022/8/3 P2	0.00670245	100	79.8134	53.3881	84.8177
2022/8/5 P1	0.00585971	100	102.009	70.1565	105.164
2022/8/5 P2	0.00536143	100	100.686	70.2048	105.466

## Sheet: Figure 3E
RLU (％ to control)	HEK293T-S
	sgControl			sgTRAF6
	PBS	IL-1α	IL-1β	PBS	IL-1α	IL-1β
HEK293T-ACE2	+	+	+	+	+	+
2022/7/31 P1	100	45.7858	48.7685	100	87.1235	79.8027
2022/7/31 P2	100	42.4389	47.18	100	93.6633	109.597
2022/8/4 P1	100	57.8066	64.9708	100	88.9987	82.1363
2022/8/4 P2	100	57.1881	63.4679	100	91.1187	108.249
