# Supplementary material for: Interleukin-1 prevents SARS-CoV-2-induced membrane fusion to restrict viral transmission via induction of actin bundles
Source: eLife. 2025 Feb 12;13:RP98593. doi: 10.7554/eLife.98593 (PMC11820142; doi:10.7554/eLife.98593)
Supplement: Figure 4—figure supplement 2—source data 3. [file elife-98593-fig4-figsupp2-data3.xlsx]

## Sheet: Figure 4—figure supplement 2B
RLU (％ to control)	HEK293T-S
RhoA-CA/ng	0	0	20	40
HEK293T-ACE2	-	+	+	+
2023/10/17 P1	2.14522	100	84.1088	42.1543
2023/10/17 P2	2.40929	100	85.1891	42.4227
2023/10/19 P1	2.1109	100	84.7277	41.8153
2023/10/19 P2	2.31218	100	86.5152	42.5176
