# Supplementary material for: Interleukin-1 prevents SARS-CoV-2-induced membrane fusion to restrict viral transmission via induction of actin bundles
Source: eLife. 2025 Feb 12;13:RP98593. doi: 10.7554/eLife.98593 (PMC11820142; doi:10.7554/eLife.98593)
Supplement: Figure 4—source data 3. [file elife-98593-fig4-data3.xlsx]

## Sheet: Figure 4C
Fluorescence intensity of GFP-AHPH (% to control)	sgControl		sgMyD88		sgTRAF6
	PBS	IL-1β	PBS	IL-1β	PBS	IL-1β
2023/5/28 P1	99.638	190.507	111.142	92.4038	116.437	110.303
2023/5/28 P2	100.458	161.265	80.0423	96.3379	95.3124	113.883
2023/5/28 P3	78.7707	265.894	115.617	73.1064	86.6426	104.56
2023/5/28 P4	85.2318	209.68	79.2219	90.1105	107.711	101.353
2023/5/28 P5	101.708	196.992	95.4243	93.6624	82.9136	103.628
2023/5/29 P1	114.722	192.993	74.076	100.626	103.553	73.8615
2023/5/29 P2	122.646	182.216	122.198	84.8713	87.9943	80.322
2023/5/29 P3	71.6148	253.433	128.873	76.2201	100.104	93.9514
2023/5/29 P4	122.795	136.452	81.4593	74.9709	109.557
2023/5/29 P5	102.416		76.4439	80.9652	77.6651
