# Supplementary material for: Interleukin-1 prevents SARS-CoV-2-induced membrane fusion to restrict viral transmission via induction of actin bundles
Source: eLife. 2025 Feb 12;13:RP98593. doi: 10.7554/eLife.98593 (PMC11820142; doi:10.7554/eLife.98593)
Supplement: Figure 5—figure supplement 2—source data 3. [file elife-98593-fig5-figsupp2-data3.xlsx]

## Sheet: Figure 5—figure supplement 2G
ACE2 expression on cell surface (％ to WGA)
	Vector	RhoA-CA
2024/7/19 P1	86.8419	95.0589
2024/7/19 P2	89.8686	96.0139
2024/7/19 P3	94.6676	91.0531
