# Supplementary material for: Interleukin-1 prevents SARS-CoV-2-induced membrane fusion to restrict viral transmission via induction of actin bundles
Source: eLife. 2025 Feb 12;13:RP98593. doi: 10.7554/eLife.98593 (PMC11820142; doi:10.7554/eLife.98593)
Supplement: Figure 5—figure supplement 3—source data 3. [file elife-98593-fig5-figsupp3-data3.xlsx]

## Sheet: Figure 5—figure supplement 3B
ACE2 expression on cell surface (％ to WGA)
	Vector	RhoA-CA
2024/7/19 P1	83.1728	88.6738
2024/7/19 P2	84.4509	92.2515
2024/7/19 P3	96.4482	87.5592

## Sheet: Figure 5—figure supplement 3D
ACE2 expression on cell surface (％ to WGA)
	Vector	RhoA-CA
2024/7/19 P1	77.9497	78.4118
2024/7/19 P2	97.0903	90.5994
2024/7/19 P3	80.5292	96.5454

## Sheet: Figure 5—figure supplement 3E
RLU (％ to control)	HEK293T-S
Y-27632 (μM)	0	0	1	10	50	0	1	10	50
IL-1β	-	-	-	-	-	+	+	+	+
HEK293T-ACE2	-	+	+	+	+	+	+	+	+
2022/07/19 P1	0.59963	100	101.274	124.66	137.981	50.2042	64.9693	59.0299	115.952
2022/07/19 P2	0.689394	100	111.815	136.195	138.838	49.9615	67.4281	58.6072	117.268
2022/07/24 P1	0.00437506	100	112.634	115.539		53.6049	52.7994	64.3222
2022/07/24 P2	0.00492195	100	120.156	111.29		58.0532	54.2664	63.092
2022/07/27 P1	0.00672011	100	101.861	116.914		51.6195	60.9495	72.0463
2023/03/25 P1	0.90257	100	129.386	128.96		58.8022	54.1192	50.5491
2023/03/25 P2	0.503329	100	105.408	114.183		46.5537	42.4778	49.8934
2023/05/17 P1	1.45297	100			126.59				127.37
2023/05/17 P2	0.751462	100			119.434				127.309
2023/05/17 P3	0.764832	100			124.156				122.73
2023/05/17 P4	0.977327	100			129.171				132.748
