# Supplementary material for: Interleukin-1 prevents SARS-CoV-2-induced membrane fusion to restrict viral transmission via induction of actin bundles
Source: eLife. 2025 Feb 12;13:RP98593. doi: 10.7554/eLife.98593 (PMC11820142; doi:10.7554/eLife.98593)
Supplement: Figure 6—figure supplement 1—source data 1. [file elife-98593-fig6-figsupp1-data1.xlsx]

## Sheet: Figure 6—figure supplement 1B
Body weight (％)	PBS									mIL-1β									mIL-1RA + mIL-1β
2023/10/13-0 dpi	100	100	100	100	100	100	100	100		100	100	100	100	100	100	100	100		100	100	100	100	100	100	100	100
2023/10/14-1 dpi	89.3367	93.2642	94.3229	95.407	96.0733	106.78	96.1579	96.2366		97.0681	98.2967	97.3711	101.737	93.3684	97.8125	96.413	99.0957		92.9412	98.3422	93.9227	94.5455	98.3425	94.8168	93.0055	99.3782
2023/10/15-2 dpi	87.449	91.1917	92.7604	101.628	91.466	96.0452	97.0526	95.3226		94.2408	94.8352	95.8763	98.7368	94.7368	99.6354	94.6739	97.0213		87.5882	93.9037	94.1989	92.1023	92.4309	93.089	92.8962	95.3368
2023/10/16-3 dpi	83.3673	88.8601	84.6354	93.9535	86.0733	91.4124	88.3684	93.3333		88.2199	86.0989	90.1546	90.7895	88.5263	92.9688	86.5761	89.6277		80.7647	91.3369	88.3978	85.2273	85.8564	90.3141	85.847	87.5648
2023/10/17-4 dpi	87.2449	91.7098	90.625	98.8372	92.6702	99.435	95.7895	97.3118		95.288	91.7582	96.3918	95.2632	94.2105	97.3958	91.8478	94.1489		78.2353	89.3048	95.0276	88.6364	86.7403	96.8586	97.2678	94.8187

## Sheet: Figure 6—figure supplement 1C
2023-11-15
Normalized intensity
	PBS				mIL-1β				mIL-1RA + mIL-1β
	Length	N	F-actin		Length	N	F-actin		Length	N	F-actin
	0	0.994933	0.367077		0	0.987282	0.465902		0	0.872416	0.462322
	0.061	0.996075	0.361511		0.061	0.988129	0.453184		0.061	0.913275	0.480741
	0.122	0.993886	0.366235		0.122	0.985337	0.436592		0.122	0.957141	0.504459
	0.183	0.993439	0.393078		0.183	0.979941	0.416722		0.183	0.971208	0.528773
	0.244	0.989349	0.401397		0.244	0.97942	0.399878		0.244	0.953251	0.549953
	0.305	0.984612	0.403189		0.305	0.972867	0.379216		0.305	0.904784	0.547702
	0.366	0.983239	0.410658		0.366	0.966722	0.363361		0.366	0.842345	0.522839
	0.427	0.981576	0.416181		0.427	0.967271	0.358949		0.427	0.801655	0.50369
	0.488	0.975894	0.411226		0.488	0.971494	0.364176		0.488	0.777004	0.50571
	0.549	0.958031	0.393515		0.549	0.981773	0.378227		0.549	0.739122	0.506224
	0.61	0.927439	0.362065		0.61	0.986741	0.392243		0.61	0.704733	0.492682
	0.671	0.889812	0.331104		0.671	0.982902	0.397376		0.671	0.691961	0.465298
	0.732	0.852659	0.312527		0.732	0.977161	0.398694		0.732	0.707294	0.444051
	0.793	0.831925	0.320242		0.793	0.984443	0.410259		0.793	0.75238	0.455976
	0.854	0.806016	0.339169		0.854	0.993506	0.417129		0.854	0.793788	0.4844
	0.915	0.765224	0.354137		0.915	0.999361	0.43149		0.915	0.820839	0.520627
	0.976	0.704565	0.35176		0.976	0.99598	0.44442		0.976	0.811722	0.535369
	1.037	0.622937	0.330301		1.037	0.986737	0.444969		1.037	0.776063	0.529502
	1.098	0.542518	0.30013		1.098	0.977584	0.443522		1.098	0.727937	0.510659
	1.159	0.48418	0.282139		1.159	0.976718	0.450608		1.159	0.672537	0.480416
	1.22	0.462173	0.273601		1.22	0.978463	0.463039		1.22	0.6216	0.449502
	1.281	0.467455	0.259367		1.281	0.97182	0.46769		1.281	0.580122	0.425357
	1.342	0.504231	0.2491		1.342	0.953533	0.461686		1.342	0.553451	0.411698
	1.403	0.580373	0.266664		1.403	0.933055	0.454298		1.403	0.541302	0.409537
	1.464	0.683494	0.309163		1.464	0.927012	0.464671		1.464	0.538894	0.414271
	1.525	0.788549	0.348567		1.525	0.927075	0.467651		1.525	0.543827	0.423463
	1.586	0.87931	0.373043		1.586	0.924549	0.471325		1.586	0.560184	0.441486
	1.647	0.939196	0.379983		1.647	0.923694	0.475204		1.647	0.584098	0.456102
	1.708	0.973741	0.378732		1.708	0.922678	0.474114		1.708	0.620471	0.471976
	1.769	0.9798	0.375475		1.769	0.91498	0.466502		1.769	0.670506	0.492373
	1.83	0.977667	0.383658		1.83	0.897784	0.443086		1.83	0.736914	0.526075
	1.891	0.93078	0.375434		1.891	0.869361	0.417945		1.891	0.800161	0.557882
	1.952	0.862784	0.356766		1.952	0.850059	0.403157		1.952	0.835263	0.566184
	2.013	0.781855	0.338714		2.013	0.833894	0.386863		2.013	0.834729	0.550741
	2.074	0.717435	0.332036		2.074	0.836141	0.368008		2.074	0.811133	0.526016
	2.135	0.670043	0.334904		2.135	0.878675	0.3786		2.135	0.778729	0.49982
	2.196	0.627824	0.329421		2.196	0.923796	0.402843		2.196	0.740043	0.47282
	2.257	0.580078	0.313311		2.257	0.948467	0.419812		2.257	0.716847	0.460718
	2.318	0.530898	0.302274		2.318	0.952737	0.420059		2.318	0.716859	0.470227
	2.379	0.499129	0.301136		2.379	0.948153	0.403086		2.379	0.708027	0.47438
	2.44	0.508482	0.305994		2.44	0.941596	0.380055		2.44	0.681302	0.460996
	2.501	0.543247	0.31015		2.501	0.936333	0.360196		2.501	0.638396	0.436408
	2.562	0.582784	0.316495		2.562	0.934012	0.346141		2.562	0.581455	0.405263
	2.623	0.618875	0.327773		2.623	0.936463	0.349576		2.623	0.52238	0.375149
	2.684	0.650561	0.344922		2.684	0.944839	0.368435		2.684	0.476616	0.35871
	2.745	0.6646	0.356761		2.745	0.936325	0.3694		2.745	0.452506	0.371243
	2.806	0.649325	0.351791		2.806	0.915894	0.367616		2.806	0.451914	0.421345
	2.867	0.60778	0.332698		2.867	0.90351	0.375784		2.867	0.468843	0.500463
	2.928	0.548373	0.305789		2.928	0.897482	0.391749		2.928	0.499039	0.585478
	2.989	0.486439	0.281789		2.989	0.884408	0.401678		2.989	0.525165	0.640412
	3.05	0.43631	0.268306		3.05	0.861208	0.398757		3.05	0.519475	0.634851
	3.111	0.405271	0.266648		3.111	0.83238	0.388537		3.111	0.474541	0.570114
	3.172	0.384369	0.269071		3.172	0.827075	0.393404		3.172	0.439122	0.501294
	3.233	0.375275	0.274388		3.233	0.826255	0.395231		3.233	0.457522	0.482894
	3.294	0.381816	0.285358		3.294	0.821482	0.388718		3.294	0.52189	0.512773
	3.355	0.394231	0.298745		3.355	0.825031	0.38762		3.355	0.586086	0.544851
	3.416	0.404235	0.308382		3.416	0.840071	0.394541		3.416	0.618106	0.551267
	3.477	0.415729	0.31641		3.477	0.878737	0.419769		3.477	0.620969	0.530922
	3.538	0.434282	0.335169		3.538	0.920722	0.44322		3.538	0.600769	0.496118
	3.599	0.460655	0.366364		3.599	0.950149	0.452235		3.599	0.546835	0.427969
	3.66	0.494733	0.401553		3.66	0.964839	0.442976		3.66	0.519388	0.389757
	3.721	0.537773	0.43671		3.721	0.970518	0.42698		3.721	0.516765	0.384078
	3.782	0.574675	0.466011		3.782	0.971141	0.40831		3.782	0.541906	0.40358
	3.843	0.606125	0.48233		3.843	0.981243	0.411647		3.843	0.584741	0.438573
	3.904	0.626984	0.489285		3.904	0.980365	0.412275		3.904	0.623427	0.462122
	3.965	0.639424	0.488707		3.965	0.962737	0.41111		3.965	0.63829	0.458157
	4.026	0.647922	0.485325		4.026	0.932502	0.40729		4.026	0.63631	0.431471
	4.087	0.671408	0.491451		4.087	0.8956	0.3972		4.087	0.626204	0.404604
	4.148	0.673302	0.473802		4.148	0.869643	0.389541		4.148	0.625839	0.392388
	4.209	0.65398	0.441633		4.209	0.860165	0.385561		4.209	0.648902	0.419365
	4.27	0.62482	0.414004		4.27	0.875839	0.399686		4.27	0.675255	0.463016
	4.331	0.59049	0.399086		4.331	0.910694	0.434514		4.331	0.698373	0.503392
	4.392	0.547784	0.389129		4.392	0.946796	0.473247		4.392	0.715588	0.521933
	4.453	0.489855	0.368756		4.453	0.967973	0.498871		4.453	0.721851	0.516008
	4.514	0.429467	0.346162		4.514	0.988392	0.522208		4.514	0.724663	0.490231
	4.575	0.389424	0.32886		4.575	0.983306	0.528373		4.575	0.739992	0.4704
	4.636	0.365839	0.316292		4.636	0.949329	0.51349		4.636	0.788949	0.469867
	4.697	0.363243	0.311997		4.697	0.899125	0.492161		4.697	0.86118	0.48789
	4.758	0.375318	0.318713		4.758	0.859678	0.476784		4.758	0.932533	0.510098
	4.819	0.393259	0.32589		4.819	0.834	0.469843		4.819	0.974357	0.513286
	4.88	0.401063	0.327472		4.88	0.829675	0.476165		4.88	0.989318	0.510365
	4.941	0.392875	0.317155		4.941	0.830275	0.48449		4.941	0.991624	0.512584
	5.002	0.368537	0.2972		5.002	0.839596	0.489157		5.002	0.986882	0.524588
	5.063	0.341404	0.27918		5.063	0.869925	0.506251		5.063	0.985925	0.559675
	5.124	0.331467	0.282019		5.124	0.918984	0.540365		5.124	0.986208	0.600976
	5.185	0.346702	0.310234		5.185	0.959133	0.561796		5.185	0.977298	0.631651
	5.246	0.379369	0.357283		5.246	0.983914	0.56822		5.246	0.976431	0.662945
	5.307	0.420188	0.407084		5.307	0.991671	0.556467		5.307	0.992024	0.688455
	5.368	0.446318	0.439303		5.368	0.990094	0.530769		5.368	0.999973	0.676165
	5.429	0.46369	0.455867		5.429	0.985302	0.497396		5.429	0.997855	0.607227
	5.49	0.479059	0.467084		5.49	0.984804	0.466596		5.49	0.985682	0.545424
	5.551	0.483914	0.463231		5.551	0.993608	0.451435		5.551	0.967165	0.523416
	5.612	0.476784	0.446656		5.612	0.981831	0.448784		5.612	0.917024	0.49518
	5.673	0.452541	0.424757		5.673	0.919086	0.431984		5.673	0.828588	0.444906
	5.734	0.437463	0.414678		5.734	0.843125	0.41889		5.734	0.741451	0.396757
	5.795	0.424051	0.406004		5.795	0.75422	0.406412		5.795	0.68102	0.369349
	5.856	0.414	0.393218		5.856	0.670408	0.39949		5.856	0.644961	0.360761
	5.917	0.399886	0.377334		5.917	0.610682	0.413451		5.917	0.600306	0.334298
	5.978	0.380855	0.361868		5.978	0.576973	0.438478		5.978	0.560055	0.30371
	6.039	0.366286	0.350242		6.039	0.557561	0.459682		6.039	0.540012	0.286863
	6.1	0.356216	0.33967		6.1	0.543843	0.471125		6.1	0.525984	0.268322
	6.161	0.349325	0.329348		6.161	0.541788	0.487875		6.161	0.522722	0.257447
	6.222	0.339925	0.312513		6.222	0.557929	0.513094		6.222	0.522631	0.250659
	6.283	0.331024	0.288874		6.283	0.575333	0.533435		6.283	0.519827	0.246459
	6.344	0.325945	0.259878		6.344	0.597408	0.556235		6.344	0.516239	0.247247
	6.405	0.322827	0.232446		6.405	0.618114	0.582463		6.405	0.506929	0.246925
	6.466	0.322278	0.213605		6.466	0.626086	0.603341		6.466	0.495424	0.248388
	6.527	0.324129	0.208326		6.527	0.618722	0.614388		6.527	0.482306	0.250208
	6.588	0.327847	0.213682		6.588	0.582863	0.602396		6.588	0.477569	0.25849
	6.649	0.330816	0.219331		6.649	0.538427	0.577294		6.649	0.472239	0.26351
	6.71	0.334773	0.22211		6.71	0.520788	0.573796		6.71	0.46042	0.266941
	6.771	0.36109	0.232554		6.771	0.536357	0.59738		6.771	0.46429	0.278914
	6.832	0.376078	0.232979		6.832	0.535333	0.601608		6.832	0.471247	0.292941
	6.893	0.377427	0.229613		6.893	0.485765	0.557965		6.893	0.47078	0.292463
	6.954	0.381733	0.230493		6.954	0.421616	0.499753		6.954	0.466612	0.28569
	7.015	0.396816	0.236057		7.015	0.365161	0.444271		7.015	0.458216	0.273761
	7.076	0.424184	0.245571		7.076	0.322247	0.401325		7.076	0.450643	0.260212
	7.137	0.468557	0.265468		7.137	0.30189	0.384337		7.137	0.440439	0.247729
	7.198	0.525576	0.291416		7.198	0.302412	0.38631		7.198	0.428992	0.236882
	7.259	0.59311	0.325422		7.259	0.318231	0.41162		7.259	0.423318	0.231224
	7.32	0.668424	0.366685		7.32	0.343376	0.449333		7.32	0.423012	0.232647
	7.381	0.729745	0.394416		7.381	0.3762	0.501286		7.381	0.417267	0.23302
	7.442	0.7826	0.425129		7.442	0.374408	0.512353		7.442	0.409584	0.229302
	7.503	0.809325	0.440082		7.503	0.339839	0.48369		7.503	0.394384	0.220863
	7.564	0.818808	0.448253		7.564	0.294173	0.434592		7.564	0.382984	0.213973
	7.625	0.824812	0.462024		7.625	0.259129	0.394325		7.625	0.377745	0.212859
	7.686	0.823486	0.480335		7.686	0.26029	0.398616		7.686	0.376631	0.218278
	7.747	0.796635	0.473355		7.747	0.272839	0.422647		7.747	0.375455	0.2238
	7.808	0.745612	0.431215		7.808	0.269714	0.43749		7.808	0.372976	0.230471
	7.869	0.698376	0.38102		7.869	0.288416	0.489824		7.869	0.372451	0.240188
	7.93	0.654757	0.343019		7.93	0.360153	0.597945		7.93	0.373376	0.251843
	7.991	0.609404	0.316067		7.991	0.43109	0.693416		7.991	0.3856	0.280118
	8.052	0.586094	0.311519		8.052	0.429533	0.696867		8.052	0.401796	0.314694
	8.113	0.580651	0.31545		8.113	0.348902	0.608588		8.113	0.418961	0.327024
	8.174	0.567553	0.308154		8.174	0.214929	0.456055		8.174	0.449325	0.324376
	8.235	0.559984	0.300516		8.235	0.113643	0.335196		8.235	0.483447	0.318686
	8.296	0.564667	0.310134		8.296	0.074882	0.276298		8.296	0.508318	0.307075
	8.357	0.570973	0.328285		8.357	0.067431	0.251122		8.357	0.548929	0.309467
	8.418	0.54898	0.32926		8.418	0.073984	0.242976		8.418	0.617604	0.342463
	8.479	0.514929	0.32356		8.479	0.085082	0.240122		8.479	0.705859	0.397286
	8.54	0.473478	0.315301		8.54	0.088827	0.233384		8.54	0.787149	0.449373
	8.601	0.434788	0.301127		8.601	0.076322	0.217631		8.601	0.845945	0.479882
	8.662	0.408545	0.289747		8.662	0.073514	0.210106		8.662	0.873271	0.483588
	8.723	0.401125	0.279642		8.723	0.07742	0.214565		8.723	0.882655	0.475757
	8.784	0.406698	0.271533		8.784	0.090525	0.224549		8.784	0.893925	0.475302
	8.845	0.422369	0.263743		8.845	0.098914	0.233604		8.845	0.90831	0.483141
	8.906	0.4438	0.258524		8.906	0.105745	0.23918		8.906	0.926584	0.495706
	8.967	0.482392	0.257015		8.967	0.104565	0.237235		8.967	0.941255	0.508388
	9.028	0.545176	0.259313		9.028	0.092851	0.226545		9.028	0.94778	0.515376
	9.089	0.6214	0.278705		9.089	0.076514	0.214902		9.089	0.956082	0.524843
	9.15	0.704651	0.329086		9.15	0.062008	0.214439		9.15	0.973357	0.541776
	9.211	0.773298	0.382722		9.211	0.055114	0.22622		9.211	0.990545	0.556337
	9.272	0.815396	0.414662		9.272	0.054949	0.244431		9.272	0.994792	0.557651
	9.333	0.845529	0.430738		9.333	0.051992	0.261847		9.333	0.993153	0.549529
	9.394	0.874376	0.438067		9.394	0.05882	0.281341		9.394	0.997251	0.551616
	9.455	0.91249	0.446121		9.455	0.073424	0.301639		9.455	0.999035	0.536804
	9.516	0.942694	0.442065		9.516	0.082941	0.30989		9.516	0.998259	0.515706
	9.577	0.966388	0.429924		9.577	0.08558	0.308702		9.577	0.999235	0.500796
	9.638	0.989557	0.422341		9.638	0.082424	0.301937		9.638	0.995424	0.485753
	9.699	0.99869	0.412376		9.699	0.072533	0.284278		9.699	0.985675	0.471231
	9.76	1	0.409847		9.76	0.052976	0.259286		9.76	0.979973	0.4662
	9.821	1	0.417562		9.821	0.050231	0.249922		9.821	0.980267	0.467878
	9.882	0.999082	0.437011		9.882	0.047341	0.242251		9.882	0.984608	0.482004
	9.943	0.995231	0.459503		9.943	0.046302	0.235447		9.943	0.983	0.476749
	10.004	0.986839	0.479649		10.004	0.051992	0.235212		10.004	0.98369	0.465502
	10.065	0.974196	0.479022		10.065	0.057463	0.237153		10.065	0.972761	0.445612
	10.126	0.972196	0.465502		10.126	0.062133	0.239396		10.126	0.934451	0.420149
	10.187	0.958584	0.439646		10.187	0.067318	0.243965		10.187	0.868588	0.391863
	10.248	0.932259	0.4154		10.248	0.081604	0.2636		10.248	0.776686	0.35982
	10.309	0.919663	0.408417		10.309	0.085078	0.282294		10.309	0.672259	0.33069
	10.37	0.915749	0.400709		10.37	0.085976	0.31391		10.37	0.560349	0.310745
	10.431	0.914933	0.38976		10.431	0.094067	0.353627		10.431	0.4508	0.295231
	10.492	0.919498	0.381176		10.492	0.104749	0.38418		10.492	0.34471	0.278204
	10.553	0.915945	0.374632		10.553	0.122706	0.407188		10.553	0.265557	0.255886
	10.614	0.893773	0.355033		10.614	0.132478	0.422569		10.614	0.246027	0.221596
	10.675	0.8696	0.345295		10.675	0.128275	0.442745		10.675	0.274702	0.176365
	10.736	0.845016	0.340415		10.736	0.12202	0.490078		10.736	0.306169	0.152051
	10.797	0.828569	0.342444		10.797	0.127467	0.580945		10.797	0.298286	0.154467
	10.858	0.831302	0.355709		10.858	0.151408	0.718914		10.858	0.262725	0.166145
	10.919	0.840678	0.369538		10.919	0.172937	0.857988		10.919	0.220839	0.17102
	10.98	0.842082	0.374601		10.98	0.197518	0.961271		10.98	0.188804	0.16969
	11.041	0.834416	0.365687		11.041	0.218796	0.996408		11.041	0.175329	0.16129
	11.102	0.817863	0.351596		11.102	0.234106	0.988737		11.102	0.175859	0.155271
	11.163	0.808071	0.343853		11.163	0.250933	0.932235		11.163	0.187161	0.150263
	11.224	0.813345	0.347574		11.224	0.250761	0.821612		11.224	0.197792	0.145212
	11.285	0.828004	0.360046		11.285	0.223271	0.685576		11.285	0.201408	0.138439
	11.346	0.847431	0.378162		11.346	0.184424	0.562086		11.346	0.200118	0.133212
	11.407	0.868733	0.394142		11.407	0.156733	0.486051		11.407	0.201929	0.1344
	11.468	0.882957	0.401029		11.468	0.144765	0.455318		11.468	0.204055	0.139698
	11.529	0.900992	0.405039		11.529	0.135212	0.450855		11.529	0.199749	0.142667
	11.59	0.923271	0.408353		11.59	0.1346	0.462137		11.59	0.184624	0.138663
	11.651	0.949169	0.415414		11.651	0.159196	0.498051		11.651	0.170925	0.133953
	11.712	0.97011	0.422473		11.712	0.188588	0.543792		11.712	0.163565	0.135463
	11.773	0.984996	0.425607		11.773	0.213675	0.585906		11.773	0.162161	0.141412
	11.834	0.997702	0.429106		11.834	0.243769	0.624592		11.834	0.154	0.149153
	11.895	0.999925	0.426876		11.895	0.244459	0.626933		11.895	0.155412	0.181569
	11.956	1	0.422268		11.956	0.222918	0.598612		11.956	0.177396	0.259737
	12.017	0.999075	0.422815		12.017	0.192769	0.549996		12.017	0.265086	0.416467
	12.078	0.997898	0.427069		12.078	0.159867	0.490447		12.078	0.378529	0.559294
	12.139	0.997137	0.432077		12.139	0.163647	0.466235		12.139	0.511114	0.656298
	12.2	0.993031	0.441133		12.2	0.157094	0.433475		12.2	0.672898	0.716953
	12.261	0.989149	0.451345		12.261	0.161314	0.420741		12.261	0.816816	0.734765
	12.322	0.989973	0.469703		12.322	0.173369	0.429078		12.322	0.90669	0.692133
	12.383	0.994486	0.476516		12.383	0.189592	0.449282		12.383	0.955753	0.631239
	12.444	0.999161	0.48669		12.444	0.208031	0.482616		12.444	0.979098	0.593596
	12.505	0.999596	0.497729		12.505	0.217745	0.524953		12.505	0.986612	0.570576
	12.566	0.995604	0.503518		12.566	0.226251	0.577431		12.566	0.990651	0.539106
	12.627	0.988106	0.514107		12.627	0.234078	0.630227		12.627	0.993549	0.505788
	12.688	0.992973	0.531344		12.688	0.228545	0.646114		12.688	0.993969	0.478714
	12.749	0.997839	0.540051		12.749	0.226886	0.614663		12.749	0.997388	0.482596
	12.81	0.999553	0.520414		12.81	0.242886	0.587965		12.81	0.999278	0.5038
	12.871	0.997875	0.493186		12.871	0.264027	0.603302		12.871	0.99982	0.536012
	12.932	0.999267	0.473608		12.932	0.281471	0.629169		12.932	0.999651	0.572153
	12.993	0.989251	0.438046		12.993	0.288616	0.645655		12.993	1	0.603239
	13.054	0.95509	0.403495		13.054	0.28562	0.639459		13.054	0.99929	0.623502
	13.115	0.90651	0.377431		13.115	0.291498	0.624251		13.115	0.99198	0.6282
	13.176	0.854576	0.3509		13.176	0.313216	0.615816		13.176	0.983133	0.618114
	13.237	0.801522	0.318779		13.237	0.342035	0.611357		13.237	0.983396	0.603953
	13.298	0.765082	0.295271		13.298	0.369286	0.606208		13.298	0.982047	0.58082
	13.359	0.769592	0.296871		13.359	0.379388	0.596831		13.359	0.986051	0.561639
	13.42	0.82009	0.330402		13.42	0.367635	0.584557		13.42	0.984624	0.543808
					13.481	0.335631	0.563051		13.481	0.983082	0.532282
					13.542	0.291224	0.540592		13.542	0.975451	0.524988
					13.603	0.2644	0.546671		13.603	0.976161	0.532725
					13.664	0.28191	0.594325		13.664	0.983443	0.552851
					13.725	0.324878	0.658875		13.725	0.985631	0.574675
					13.786	0.341188	0.688051		13.786	0.964263	0.580404
									13.847	0.920482	0.564169
									13.908	0.871522	0.543624
									13.969	0.817102	0.511482
									14.03	0.775714	0.479886
									14.091	0.744267	0.444984
									14.152	0.745361	0.422055
									14.213	0.778976	0.42611
									14.274	0.817388	0.439588
									14.335	0.855235	0.455643
									14.396	0.881788	0.466898
									14.457	0.895227	0.471494
									14.518	0.902518	0.475067
									14.579	0.90651	0.475286
									14.64	0.919816	0.480922
									14.701	0.941522	0.482365
									14.762	0.967608	0.485824
									14.823	0.985796	0.483404
									14.884	0.990616	0.462702
									14.945	0.988988	0.444737
									15.006	0.995478	0.440008
									15.067	0.995824	0.440788

## Sheet: Figure 6—figure supplement 1D
2023-11-15
Normalized intensity
	PBS				mIL-1β				mIL-1RA + mIL-1β
	Length	N	F-actin		Length	N	F-actin		Length	N	F-actin
	0	0.781231	0.377365		0	1	0.723529		0	0.991867	0.41478
	0.061	0.740063	0.360319		0.061	1	0.694627		0.061	0.988384	0.411482
	0.122	0.731624	0.346526		0.122	0.988663	0.624706		0.122	0.983227	0.40718
	0.183	0.749114	0.356745		0.183	0.948773	0.546078		0.183	0.988745	0.413624
	0.244	0.780651	0.378944		0.244	0.927729	0.47751		0.244	0.997427	0.4352
	0.305	0.826384	0.403735		0.305	0.94391	0.443016		0.305	0.999812	0.468157
	0.366	0.882286	0.437393		0.366	0.976114	0.431502		0.366	0.998643	0.501384
	0.427	0.925063	0.468939		0.427	0.979537	0.416953		0.427	0.99798	0.52138
	0.488	0.950118	0.477316		0.488	0.930757	0.3776		0.488	0.996055	0.523604
	0.549	0.970467	0.486236		0.549	0.887604	0.37149		0.549	0.99482	0.521776
	0.61	0.970259	0.483144		0.61	0.855498	0.387796		0.61	0.989961	0.51371
	0.671	0.973882	0.484054		0.671	0.835624	0.419439		0.671	0.983733	0.495655
	0.732	0.987443	0.497214		0.732	0.869192	0.478482		0.732	0.982584	0.478529
	0.793	0.985435	0.500264		0.793	0.944239	0.52871		0.793	0.985733	0.460063
	0.854	0.97598	0.496108		0.854	0.96691	0.488384		0.854	0.989	0.438824
	0.915	0.966831	0.496587		0.915	0.962659	0.501969		0.915	0.991345	0.421204
	0.976	0.922122	0.475916		0.976	0.900635	0.500914		0.976	0.994729	0.407008
	1.037	0.853161	0.445244		1.037	0.805502	0.47409		1.037	0.995549	0.395188
	1.098	0.738859	0.401096		1.098	0.746647	0.461125		1.098	0.993067	0.391078
	1.159	0.616776	0.352386		1.159	0.756467	0.490447		1.159	0.990224	0.401094
	1.22	0.517769	0.322672		1.22	0.799631	0.529671		1.22	0.980773	0.410329
	1.281	0.471412	0.313245		1.281	0.828992	0.546588		1.281	0.962424	0.425765
	1.342	0.482906	0.317514		1.342	0.849867	0.563349		1.342	0.938925	0.442106
	1.403	0.528447	0.323666		1.403	0.811878	0.546659		1.403	0.879004	0.416086
	1.464	0.631208	0.349329		1.464	0.779467	0.539365		1.464	0.807239	0.373933
	1.525	0.737082	0.374512		1.525	0.74969	0.521098		1.525	0.744008	0.341267
	1.586	0.852522	0.42005		1.586	0.708933	0.47969		1.586	0.699447	0.315569
	1.647	0.926882	0.452433		1.647	0.670663	0.43511		1.647	0.690533	0.304992
	1.708	0.932808	0.450796		1.708	0.626765	0.398141		1.708	0.7478	0.330847
	1.769	0.908463	0.434642		1.769	0.556878	0.343922		1.769	0.857529	0.381549
	1.83	0.854647	0.403116		1.83	0.483663	0.317204		1.83	0.945957	0.41631
	1.891	0.760882	0.364645		1.891	0.428957	0.330443		1.891	0.989655	0.435722
	1.952	0.644855	0.34197		1.952	0.344541	0.315047		1.952	0.998533	0.452071
	2.013	0.532467	0.314038		2.013	0.274698	0.29751		2.013	0.999063	0.474859
	2.074	0.449467	0.289244		2.074	0.233482	0.291188		2.074	0.999851	0.502922
	2.135	0.378306	0.273097		2.135	0.1918	0.275369		2.135	0.998384	0.520796
	2.196	0.325325	0.279945		2.196	0.161043	0.262914		2.196	0.995659	0.528682
	2.257	0.287427	0.291859		2.257	0.136471	0.253937		2.257	0.990114	0.51809
	2.318	0.269604	0.299487		2.318	0.11902	0.248933		2.318	0.985863	0.49691
	2.379	0.2706	0.306367		2.379	0.115725	0.243145		2.379	0.987875	0.470396
	2.44	0.293059	0.311638		2.44	0.117745	0.237871		2.44	0.993631	0.454984
	2.501	0.315608	0.309049		2.501	0.1326	0.232678		2.501	0.998573	0.440769
	2.562	0.336125	0.307867		2.562	0.149	0.222863		2.562	0.998012	0.426004
	2.623	0.340059	0.295667		2.623	0.177102	0.223227		2.623	0.99558	0.428047
	2.684	0.330059	0.285902		2.684	0.211408	0.232941		2.684	0.996725	0.446494
	2.745	0.327231	0.29284		2.745	0.226702	0.228588		2.745	0.984953	0.455906
	2.806	0.32429	0.309282		2.806	0.212302	0.21982		2.806	0.962114	0.444976
	2.867	0.319357	0.320369		2.867	0.169569	0.209255		2.867	0.966843	0.425
	2.928	0.306165	0.30778		2.928	0.122957	0.199635		2.928	0.984392	0.398749
	2.989	0.302737	0.302858		2.989	0.0856157	0.195835		2.989	0.982502	0.379525
	3.05	0.300325	0.304253		3.05	0.0701608	0.199886		3.05	0.949329	0.368565
	3.111	0.295133	0.308814		3.111	0.0557059	0.205463		3.111	0.876106	0.347651
	3.172	0.294173	0.311095		3.172	0.0402275	0.199678		3.172	0.753361	0.298314
	3.233	0.295686	0.313508		3.233	0.0467176	0.20449		3.233	0.614647	0.234847
	3.294	0.294365	0.307042		3.294	0.070949	0.215639		3.294	0.493125	0.186569
	3.355	0.297675	0.296641		3.355	0.0837804	0.218031		3.355	0.407898	0.1656
	3.416	0.319161	0.293291		3.416	0.0596784	0.192796		3.416	0.350094	0.162604
	3.477	0.367475	0.308458		3.477	0.0279255	0.166694		3.477	0.297243	0.155392
	3.538	0.435596	0.332709		3.538	0.0313137	0.183129		3.538	0.261357	0.153655
	3.599	0.5166	0.366349		3.599	0.059498	0.234761		3.599	0.248122	0.162533
	3.66	0.60058	0.401086		3.66	0.0845176	0.281525		3.66	0.236247	0.1596
	3.721	0.683392	0.431311		3.721	0.139361	0.366957		3.721	0.231894	0.155831
	3.782	0.751016	0.456631		3.782	0.185416	0.428322		3.782	0.237706	0.157075
	3.843	0.802714	0.473204		3.843	0.21398	0.464612		3.843	0.246259	0.159165
	3.904	0.844694	0.484975		3.904	0.191894	0.436945		3.904	0.25218	0.1612
	3.965	0.862749	0.48272		3.965	0.15102	0.382643		3.965	0.252325	0.157788
	4.026	0.858506	0.482234		4.026	0.111122	0.319843		4.026	0.2454	0.151906
	4.087	0.837314	0.479292		4.087	0.0901725	0.276008		4.087	0.236624	0.148157
	4.148	0.801376	0.472156		4.148	0.112773	0.27118		4.148	0.22938	0.148208
	4.209	0.756435	0.457929		4.209	0.155835	0.305502		4.209	0.22789	0.152675
	4.27	0.70751	0.440249		4.27	0.201314	0.349902		4.27	0.230914	0.163561
	4.331	0.662647	0.423126		4.331	0.198314	0.353784		4.331	0.228239	0.18558
	4.392	0.634682	0.412798		4.392	0.197733	0.357961		4.392	0.217325	0.204757
	4.453	0.624275	0.406461		4.453	0.206188	0.369576		4.453	0.208714	0.209278
	4.514	0.618616	0.394245		4.514	0.21629	0.379514		4.514	0.230004	0.218706
	4.575	0.64031	0.396066		4.575	0.22189	0.381188		4.575	0.247769	0.215722
	4.636	0.674475	0.402529		4.636	0.244306	0.397345		4.636	0.254929	0.200427
	4.697	0.705137	0.397174		4.697	0.285729	0.420867		4.697	0.264757	0.188153
	4.758	0.74109	0.398864		4.758	0.332988	0.449565		4.758	0.275459	0.179643
	4.819	0.751243	0.383265		4.819	0.372976	0.477373		4.819	0.270847	0.159757
	4.88	0.700608	0.357808		4.88	0.384184	0.475925		4.88	0.270612	0.146616
	4.941	0.602765	0.331447		4.941	0.374486	0.44831		4.941	0.301514	0.171757
	5.002	0.543376	0.317432		5.002	0.353549	0.414051		5.002	0.321761	0.184137
	5.063	0.54151	0.327439		5.063	0.318349	0.366812		5.063	0.346925	0.199678
	5.124	0.558898	0.344971		5.124	0.265173	0.312365		5.124	0.365706	0.213267
	5.185	0.556282	0.340741		5.185	0.220859	0.26289		5.185	0.384318	0.22098
	5.246	0.559204	0.337881		5.246	0.194506	0.231914		5.246	0.41202	0.229675
	5.307	0.575514	0.343614		5.307	0.182059	0.223647		5.307	0.447294	0.241992
	5.368	0.576973	0.339096		5.368	0.187431	0.227431		5.368	0.487129	0.257678
	5.429	0.606388	0.367789		5.429	0.170992	0.196776		5.429	0.532031	0.274365
	5.49	0.601263	0.374914		5.49	0.136341	0.15558		5.49	0.567792	0.287773
	5.551	0.558812	0.362451		5.551	0.0782745	0.112204		5.551	0.587949	0.289086
	5.612	0.504522	0.350936		5.612	0.0405294	0.0812392		5.612	0.598408	0.285216
	5.673	0.441584	0.347063		5.673	0.0250549	0.0805059		5.673	0.615663	0.294125
	5.734	0.387565	0.349442		5.734	0.0141176	0.08		5.734	0.603055	0.290847
	5.795	0.34818	0.360864		5.795	0.00447451	0.0732078		5.795	0.559525	0.270639
	5.856	0.334329	0.376551		5.856	0	0.0560941		5.856	0.498486	0.245388
	5.917	0.353341	0.403034		5.917	0	0.0410314		5.917	0.432639	0.224416
	5.978	0.381855	0.42345		5.978	0	0.0296706		5.978	0.373447	0.208804
	6.039	0.40729	0.432558		6.039	0.00181961	0.0221451		6.039	0.324875	0.198161
	6.1	0.4158	0.423629		6.1	0.0109216	0.020851		6.1	0.290298	0.198525
	6.161	0.40082	0.392518		6.161	0.0176314	0.023298		6.161	0.26958	0.199208
	6.222	0.378592	0.354769		6.222	0.0184824	0.0282784		6.222	0.260129	0.196878
	6.283	0.363349	0.326831		6.283	0.0146667	0.0335373		6.283	0.257322	0.193067
	6.344	0.356314	0.315549		6.344	0.0097451	0.0334667		6.344	0.262478	0.185482
	6.405	0.349455	0.311729		6.405	0.00107059	0.0294471		6.405	0.275055	0.182945
	6.466	0.349078	0.320136		6.466	0	0.0190549		6.466	0.295396	0.184847
	6.527	0.358216	0.345161		6.527	0.0147608	0.0203647		6.527	0.316212	0.191098
	6.588	0.36029	0.369611		6.588	0.0208745	0.026749		6.588	0.332612	0.201404
	6.649	0.352529	0.382377		6.649	0.0137255	0.0379137		6.649	0.344439	0.209914
	6.71	0.341118	0.389424		6.71	0.00225098	0.0526471		6.71	0.345906	0.21449
	6.771	0.337408	0.399355		6.771	2.7451e-05	0.0698471		6.771	0.340129	0.215757
	6.832	0.342263	0.411153		6.832	0.00380392	0.106118		6.832	0.329835	0.215698
	6.893	0.346769	0.416776		6.893	0.0291255	0.159984		6.893	0.3168	0.2166
	6.954	0.342682	0.410452		6.954	0.0604235	0.206478		6.954	0.306522	0.217024
	7.015	0.334427	0.391795		7.015	0.0822824	0.235643		7.015	0.301153	0.216027
	7.076	0.3354	0.374468		7.076	0.0787137	0.228937		7.076	0.298831	0.21651
	7.137	0.34	0.357127		7.137	0.0580863	0.19529		7.137	0.292663	0.2166
	7.198	0.348239	0.338438		7.198	0.0301686	0.147686		7.198	0.289643	0.218498
	7.259	0.358545	0.3204		7.259	0.0065098	0.107835		7.259	0.289502	0.219424
	7.32	0.37258	0.309432		7.32	0.00490588	0.0871765		7.32	0.289118	0.214706
	7.381	0.38451	0.295922		7.381	0.0129529	0.0789686		7.381	0.289898	0.209145
	7.442	0.398392	0.286531		7.442	0.0171961	0.0714196		7.442	0.30569	0.210663
	7.503	0.413541	0.286573		7.503	0.0244157	0.074302		7.503	0.348196	0.218714
	7.564	0.428345	0.291204		7.564	0.0431373	0.0920667		7.564	0.411306	0.224549
	7.625	0.444835	0.298373		7.625	0.0415922	0.118855		7.625	0.495627	0.235263
	7.686	0.457349	0.303673		7.686	0.0495804	0.173114		7.686	0.599118	0.258843
	7.747	0.462561	0.304497		7.747	0.0412431	0.191506		7.747	0.726545	0.302788
	7.808	0.459475	0.300643		7.808	0.0381686	0.199667		7.808	0.845333	0.356624
	7.869	0.434969	0.29163		7.869	0.0510078	0.228722		7.869	0.922208	0.399337
	7.93	0.401933	0.281502		7.93	0.0628627	0.266486		7.93	0.922541	0.402753
	7.991	0.39451	0.27522		7.991	0.0456471	0.295753		7.991	0.862157	0.385157
	8.052	0.412843	0.273302		8.052	0.0143686	0.31882		8.052	0.741667	0.342961
	8.113	0.450773	0.274496		8.113	0.00942745	0.379239		8.113	0.609831	0.303867
	8.174	0.506796	0.27632		8.174	0.0344039	0.469224		8.174	0.501529	0.275635
	8.235	0.589482	0.295415		8.235	0.102922	0.603871		8.235	0.440827	0.258992
	8.296	0.700647	0.333591		8.296	0.219624	0.798435		8.296	0.408192	0.236118
	8.357	0.817518	0.372193		8.357	0.261384	0.92662		8.357	0.380631	0.219482
	8.418	0.927741	0.415053		8.418	0.235086	0.992678		8.418	0.350306	0.209804
	8.479	0.967973	0.403546		8.479	0.227478	0.999725		8.479	0.323765	0.202349
	8.54	0.9922	0.398642		8.54	0.257075	0.996925		8.54	0.3082	0.19298
	8.601	0.999545	0.401875		8.601	0.267451	0.937882		8.601	0.29798	0.181682
	8.662	1	0.411735		8.662	0.242051	0.818373		8.662	0.295149	0.172839
	8.723	0.999729	0.423098		8.723	0.16962	0.652659		8.723	0.305369	0.169914
	8.784	0.999259	0.433353		8.784	0.115965	0.526416		8.784	0.342325	0.183098
	8.845	0.998737	0.441038		8.845	0.126843	0.487376		8.845	0.395443	0.205796
	8.906	0.999459	0.450785		8.906	0.0834275	0.433898		8.906	0.444102	0.222961
	8.967	0.999835	0.45621		8.967	0.0319333	0.401443		8.967	0.485855	0.239031
	9.028	0.999553	0.454159		9.028	0.0091451	0.416714		9.028	0.530537	0.259608
	9.089	0.999675	0.450598		9.089	0.0578314	0.512094		9.089	0.581949	0.288459
	9.15	0.999686	0.44868		9.15	0.176698	0.690424		9.15	0.634906	0.323816
	9.211	0.996361	0.439533		9.211	0.306294	0.879906		9.211	0.683561	0.355361
	9.272	0.980176	0.417757		9.272	0.346384	0.986718		9.272	0.72042	0.375565
	9.333	0.956424	0.397221		9.333	0.286106	0.974102		9.333	0.74471	0.386722
	9.394	0.956333	0.396805		9.394	0.242796	0.975627		9.394	0.751349	0.384584
	9.455	0.977404	0.418348		9.455	0.234337	0.993643		9.455	0.730773	0.368953
	9.516	0.984537	0.428953		9.516	0.230969	0.999651		9.516	0.656047	0.323953
	9.577	0.968678	0.417111		9.577	0.219608	0.999247		9.577	0.556388	0.284341
	9.638	0.937549	0.391962		9.638	0.209808	0.992784		9.638	0.446624	0.239945
	9.699	0.899271	0.360685		9.699	0.227831	0.993263		9.699	0.357035	0.200404
	9.76	0.858702	0.327551		9.76	0.236071	0.975043		9.76	0.29889	0.172114
	9.821	0.807275	0.313094		9.821	0.183624	0.894969		9.821	0.271553	0.155529
	9.882	0.737388	0.311784		9.882	0.120584	0.783624		9.882	0.257224	0.148216
	9.943	0.719608	0.325913		9.943	0.0883608	0.674161		9.943	0.245435	0.141102
	10.004	0.755957	0.347333		10.004	0.103396	0.594298		10.004	0.236592	0.13502
	10.065	0.81762	0.376016		10.065	0.109482	0.516478		10.065	0.237424	0.136404
	10.126	0.885075	0.403003		10.126	0.0867843	0.447137		10.126	0.248922	0.142384
	10.187	0.940455	0.418498		10.187	0.0768627	0.386765		10.187	0.25802	0.145678
	10.248	0.979976	0.420626		10.248	0.0709137	0.347482		10.248	0.26598	0.142835
	10.309	0.996141	0.412275		10.309	0.0644431	0.314722		10.309	0.281325	0.143851
	10.37	0.999878	0.409197		10.37	0.0917961	0.278984		10.37	0.303427	0.155545
	10.431	1	0.401806		10.431	0.114471	0.245588		10.431	0.333541	0.178745
	10.492	1	0.395314		10.492	0.179278	0.242231		10.492	0.362663	0.201651
	10.553	0.990384	0.393414		10.553	0.196592	0.231937		10.553	0.382012	0.2162
	10.614	0.957902	0.38689		10.614	0.193525	0.240286		10.614	0.390624	0.219106
	10.675	0.908808	0.36628		10.675	0.175839	0.277149		10.675	0.39	0.215729
	10.736	0.852941	0.338153		10.736	0.16658	0.349914		10.736	0.387706	0.211957
	10.797	0.796576	0.320341		10.797	0.142737	0.42702		10.797	0.388898	0.206945
	10.858	0.740012	0.314745		10.858	0.106322	0.489792		10.858	0.387035	0.199957
	10.919	0.689737	0.311606		10.919	0.0699647	0.537435		10.919	0.383827	0.195788
	10.98	0.649212	0.312739		10.98	0.0826078	0.587663		10.98	0.384196	0.20069
	11.041	0.605541	0.308998		11.041	0.0904549	0.628812		11.041	0.388208	0.214553
	11.102	0.560929	0.306754		11.102	0.127227	0.727435		11.102	0.389698	0.224824
	11.163	0.5274	0.302257		11.163	0.176839	0.844251		11.163	0.4016	0.243702
	11.224	0.505827	0.296129		11.224	0.261639	0.937784		11.224	0.431125	0.272725
	11.285	0.499388	0.289098		11.285	0.311722	0.9568		11.285	0.453608	0.292863
	11.346	0.492286	0.265614		11.346	0.255212	0.855996		11.346	0.457439	0.286267
	11.407	0.499604	0.251926		11.407	0.181961	0.729078		11.407	0.449882	0.262153
	11.468	0.515329	0.248425		11.468	0.103608	0.579843		11.468	0.442196	0.233235
	11.529	0.531235	0.249779		11.529	0.0336745	0.444353		11.529	0.44758	0.216212
	11.59	0.546376	0.254533		11.59	0.00690196	0.351624		11.59	0.458651	0.204863
	11.651	0.56102	0.262852		11.651	0.0140627	0.292518		11.651	0.485196	0.20922
	11.712	0.570839	0.273404		11.712	0.0237451	0.240961		11.712	0.537286	0.236165
	11.773	0.577192	0.279725		11.773	0.035149	0.195153		11.773	0.596067	0.271925
	11.834	0.578675	0.275278		11.834	0.0470078	0.162867		11.834	0.660431	0.31289
	11.895	0.579439	0.268241		11.895	0.0598902	0.142341		11.895	0.709349	0.351545
	11.956	0.58849	0.267495		11.956	0.0590588	0.127137		11.956	0.732522	0.376455
	12.017	0.627235	0.284622		12.017	0.0445529	0.124651		12.017	0.708588	0.368694
	12.078	0.680024	0.305033		12.078	0.0375569	0.131306		12.078	0.629616	0.326388
	12.139	0.72742	0.310136		12.139	0.0179725	0.127459		12.139	0.528039	0.278675
	12.2	0.784659	0.316166		12.2	0.0125647	0.117098		12.2	0.4318	0.236545
	12.261	0.864251	0.342063		12.261	0.00886274	0.0964549		12.261	0.399502	0.224773
	12.322	0.945259	0.373184		12.322	0.0135176	0.0967529		12.322	0.417408	0.224471
	12.383	0.980592	0.377857		12.383	0.0127765	0.0933686		12.383	0.45151	0.209608
	12.444	0.990557	0.377686		12.444	0.00800784	0.082851		12.444	0.528302	0.217592
	12.505	0.996259	0.383333		12.505	0.00643922	0.0739098		12.505	0.657518	0.269137
	12.566	0.993518	0.39217		12.566	0.00163137	0.0698471		12.566	0.798769	0.329769
	12.627	0.981576	0.399799		12.627	0.0137922	0.0690039		12.627	0.908549	0.371298
	12.688	0.971184	0.406736		12.688	0.0128157	0.0706196		12.688	0.97578	0.392765
	12.749	0.967024	0.412876		12.749	0.0124627	0.0642706		12.749	0.998345	0.397792
	12.81	0.970443	0.425863		12.81	0.0105529	0.0609529		12.81	0.99898	0.401761
	12.871	0.974545	0.446063		12.871	0.0140824	0.0604275		12.871	0.999533	0.398973
	12.932	0.979529	0.447199		12.932	0.0175451	0.0595333		12.932	0.999518	0.398118
	12.993	0.98858	0.438053		12.993	0.0196078	0.0608275		12.993	0.998816	0.404169
	13.054	0.992345	0.421157		13.054	0.0188784	0.0579412		13.054	0.994125	0.40629
	13.115	0.994349	0.400723		13.115	0.0112039	0.0469176		13.115	0.988094	0.403969
	13.176	0.995169	0.386571		13.176	0.0111294	0.0464235		13.176	0.97691	0.393412
	13.237	0.997471	0.378653		13.237	0.0172314	0.0501529		13.237	0.95302	0.369569
	13.298	0.999055	0.371069		13.298	0.0184039	0.056902		13.298	0.918957	0.340741
	13.359	0.992765	0.358798		13.359	0.0113216	0.063149		13.359	0.881376	0.314824
	13.42	0.989349	0.358507		13.42	0.0105569	0.0785608		13.42	0.858953	0.306957
	13.481	0.981953	0.356931		13.481	0.0137176	0.088451		13.481	0.876275	0.322878
	13.542	0.968937	0.35376		13.542	0.0130627	0.093651		13.542	0.923325	0.347467
	13.603	0.948914	0.34557		13.603	0.0258431	0.105075		13.603	0.964753	0.36442
	13.664	0.926945	0.333035		13.664	0.0394157	0.121259		13.664	0.979486	0.370718
	13.725	0.907318	0.322917		13.725	0.0510745	0.138161		13.725	0.973584	0.363647
	13.786	0.900122	0.316057		13.786	0.0487255	0.141894		13.786	0.948725	0.349267
	13.847	0.914114	0.321668		13.847	0.0350588	0.129176		13.847	0.920255	0.336082
	13.908	0.918933	0.335305		13.908	0.019702	0.116898		13.908	0.882871	0.326925
	13.969	0.910063	0.348774		13.969	0.0348902	0.145569		13.969	0.835361	0.314925
	14.03	0.879137	0.347769						14.03	0.784051	0.303208
	14.091	0.822267	0.327715						14.091	0.720835	0.283545
	14.152	0.754329	0.29782						14.152	0.665176	0.269784
	14.213	0.689106	0.274976						14.213	0.627325	0.273663
	14.274	0.64318	0.271807						14.274	0.593384	0.272325
									14.335	0.564584	0.265118
									14.396	0.547212	0.260604
									14.457	0.551141	0.262984
									14.518	0.586439	0.273471
									14.579	0.640416	0.293129
									14.64	0.675337	0.304427
