# Supplementary material for: Interleukin-1 prevents SARS-CoV-2-induced membrane fusion to restrict viral transmission via induction of actin bundles
Source: eLife. 2025 Feb 12;13:RP98593. doi: 10.7554/eLife.98593 (PMC11820142; doi:10.7554/eLife.98593)
Supplement: Figure 6—figure supplement 2—source data 3. [file elife-98593-fig6-figsupp2-data3.xlsx]

## Sheet: Figure 6—figure supplement 2B
Body weight (％)	PBS						mIL-1β
2023/8/30-D0	100	100	100	100	100		100	100	100	100	100
2023/9/1-D1	95.5556	98.2659	97.4747	98.4456	100		97.2376	97.8723	99.6602	98.5577	95.8115
2023/9/2-D2	97.2222	98.8439	96.4646	97.9275	98.9899		100	100.304	100.227	97.5962	96.8586
2023/9/3-D3	98.3333	98.8439	96.4646	101.036	98.9899		98.895	98.4802	99.6602	97.1154	97.3822
2023/9/4-D4	100	99.422	98.4848	103.109	100		100	99.0881	101.925	98.0769	98.9529
2023/9/5-D5	100.556	100	97.9798	101.554	101.01		101.657	102.128	103.058	99.0385	100
2023/9/6-D6	100.556	98.8439	98.4848	102.073	101.01		103.315	101.52	102.492	99.5192	101.571
2023/9/7-D7	101.111	98.8439	98.4848	101.554	102.02		103.867	102.736	103.624	99.5192	102.618

## Sheet: Figure 6—figure supplement 2C
2023-09-07
Liver weight (g)
	PBS	mIL-1β
	0.7877	0.7873
	0.7651	0.864
	0.8806	0.8096
	0.9845	0.9446
	0.9322	0.7732

## Sheet: Figure 6—figure supplement 2D
2023-09-07
Spleen weight (g)
	PBS	mIL-1β
	0.0579	0.0952
	0.0749	0.0656
	0.0727	0.0602
	0.0686	0.0735
	0.0854	0.0832
