# Supplementary material for: Interleukin-1 prevents SARS-CoV-2-induced membrane fusion to restrict viral transmission via induction of actin bundles
Source: eLife. 2025 Feb 12;13:RP98593. doi: 10.7554/eLife.98593 (PMC11820142; doi:10.7554/eLife.98593)
Supplement: Figure 6—source data 3. [file elife-98593-fig6-data3.xlsx]

## Sheet: Figure 6B
2023-11-04
Histopothology score
	PBS	mIL-1β	mIL-1RA + mIL-1β
	5	10	20
	18	6	19
	15	3	15
	21	15	26
	16	12	10
	18	8	15
	10	4	18
	20	8	12

## Sheet: Figure 6C
2023-10-29
Relative expression (to Control)
	PBS	mIL-1β	mIL-1RA + mIL-1β
	1.65442	0.804892	0.373863
	0.865024	0.369728	1.80471
	1.13184	0.34459	1.26382
	1.27647	0.21158	2.95873
	1.1531	0.694763	1.69339
	1.00456	0.289494	1.59841
	0.467421	0.327912	1.17971
	0.447163	0.17898	0.987265

## Sheet: Figure 6E
2023-11-13
Infected area (％)
	PBS	mIL-1β	mIL-1RA + mIL-1β
	10.804	5.326	15.312
	7.394	4.577	9.386
	8.058	2.465	16.538
	5.508	6.301	6.331
	3.421	3.32	12.754
	10.154	2.425	10.452
	7.265	1.542	5.421
	9.75	9.754	8.124

## Sheet: Figure 6F
2023-11-15
Normalized intensity
	PBS				mIL-1β				mIL-1RA + mIL-1β
	Length	N	F-actin		Length	N	F-actin		Length	N	F-actin
	0	0.995024	0.704576		0	0.549318	0.375949		0	0.994694	0.452482
	0.061	0.996024	0.708329		0.061	0.556341	0.374176		0.061	0.995082	0.457255
	0.122	0.999427	0.709957		0.122	0.579863	0.375922		0.122	0.992075	0.460145
	0.183	0.998796	0.705306		0.183	0.638329	0.401345		0.183	0.991267	0.468976
	0.244	0.996749	0.697098		0.244	0.705271	0.430475		0.244	0.986165	0.487875
	0.305	0.995345	0.692031		0.305	0.790188	0.467408		0.305	0.97311	0.521141
	0.366	0.997035	0.693086		0.366	0.852055	0.486039		0.366	0.961906	0.540102
	0.427	0.998467	0.695537		0.427	0.901427	0.494357		0.427	0.979306	0.575055
	0.488	0.999906	0.699318		0.488	0.944157	0.509859		0.488	0.9944	0.607141
	0.549	0.99918	0.695282		0.549	0.975741	0.523047		0.549	0.998212	0.613067
	0.61	0.999129	0.67978		0.61	0.989165	0.516706		0.61	0.999557	0.596565
	0.671	0.99998	0.649184		0.671	0.994694	0.526294		0.671	0.994416	0.571918
	0.732	0.999239	0.612392		0.732	0.988047	0.535059		0.732	0.980847	0.551024
	0.793	0.995576	0.578443		0.793	0.983655	0.543698		0.793	0.968929	0.53802
	0.854	0.996008	0.558282		0.854	0.980267	0.540471		0.854	0.973435	0.542976
	0.915	0.997988	0.558016		0.915	0.975847	0.534373		0.915	0.989278	0.564451
	0.976	0.999827	0.571698		0.976	0.970098	0.530871		0.976	0.999478	0.582922
	1.037	1	0.574227		1.037	0.962769	0.525533		1.037	0.998329	0.579808
	1.098	0.999533	0.568584		1.098	0.943141	0.52231		1.098	0.995937	0.566549
	1.159	0.99569	0.559141		1.159	0.909757	0.513208		1.159	0.993604	0.567753
	1.22	0.983424	0.543118		1.22	0.856125	0.495863		1.22	0.983933	0.560922
	1.281	0.977188	0.533255		1.281	0.805529	0.487024		1.281	0.961318	0.53642
	1.342	0.985055	0.533843		1.342	0.779027	0.492651		1.342	0.935941	0.510682
	1.403	0.991541	0.539663		1.403	0.778792	0.510384		1.403	0.881341	0.482424
	1.464	0.998157	0.538651		1.464	0.800039	0.531078		1.464	0.821071	0.460749
	1.525	0.9998	0.521565		1.525	0.84351	0.553514		1.525	0.770906	0.454812
	1.586	0.996545	0.492659		1.586	0.9064	0.582973		1.586	0.738275	0.472737
	1.647	0.99389	0.472039		1.647	0.968894	0.610522		1.647	0.706463	0.492118
	1.708	0.990373	0.452047		1.708	0.995467	0.622839		1.708	0.666522	0.498067
	1.769	0.972769	0.43338		1.769	0.994655	0.622345		1.769	0.624325	0.489039
	1.83	0.954251	0.426702		1.83	0.987439	0.638133		1.83	0.604824	0.484227
	1.891	0.95171	0.442843		1.891	0.981922	0.66498		1.891	0.620565	0.488737
	1.952	0.957694	0.467294		1.952	0.981463	0.69169		1.952	0.658271	0.489725
	2.013	0.953325	0.482733		2.013	0.962631	0.685416		2.013	0.704157	0.477976
	2.074	0.934647	0.482941		2.074	0.924447	0.650125		2.074	0.767149	0.468427
	2.135	0.907482	0.469937		2.135	0.886659	0.603251		2.135	0.841286	0.469678
	2.196	0.872275	0.446224		2.196	0.881831	0.57511		2.196	0.918243	0.485212
	2.257	0.843043	0.4314		2.257	0.921239	0.57351		2.257	0.972529	0.502906
	2.318	0.825867	0.427941		2.318	0.968318	0.56869		2.318	0.994239	0.511447
	2.379	0.812243	0.427286		2.379	0.990694	0.548745		2.379	0.994671	0.509996
	2.44	0.800945	0.426216		2.44	0.998369	0.533588		2.44	0.992169	0.498361
	2.501	0.791835	0.42431		2.501	0.999776	0.522365		2.501	0.988812	0.487169
	2.562	0.782824	0.420871		2.562	0.998882	0.521596		2.562	0.991953	0.488898
	2.623	0.775106	0.421996		2.623	0.997463	0.529541		2.623	0.997463	0.522208
	2.684	0.76929	0.425286		2.684	0.994961	0.546596		2.684	0.999996	0.565361
	2.745	0.778118	0.441141		2.745	0.997224	0.569714		2.745	0.999106	0.588255
	2.806	0.799235	0.458145		2.806	0.999776	0.603341		2.806	0.995075	0.594525
	2.867	0.8192	0.465541		2.867	0.9996	0.622886		2.867	0.987898	0.599929
	2.928	0.841294	0.478882		2.928	0.993776	0.611267		2.928	0.986812	0.6132
	2.989	0.852012	0.487992		2.989	0.971729	0.587765		2.989	0.991769	0.636098
	3.05	0.834733	0.478733		3.05	0.938267	0.554247		3.05	0.9966	0.660573
	3.111	0.802569	0.458941		3.111	0.900231	0.518953		3.111	0.997384	0.676416
	3.172	0.767027	0.444251		3.172	0.858494	0.484051		3.172	0.996463	0.672639
	3.233	0.738914	0.441086		3.233	0.823325	0.46242		3.233	0.990451	0.653867
	3.294	0.714447	0.444439		3.294	0.793094	0.452761		3.294	0.98811	0.645502
	3.355	0.688416	0.444839		3.355	0.759573	0.442235		3.355	0.994553	0.654443
	3.416	0.656345	0.435259		3.416	0.710224	0.422341		3.416	0.991435	0.655604
	3.477	0.630871	0.430467		3.477	0.658953	0.403812		3.477	0.994188	0.687957
	3.538	0.605133	0.423388		3.538	0.604235	0.384706		3.538	0.99369	0.711482
	3.599	0.586596	0.42098		3.599	0.559212	0.376643		3.599	0.988286	0.71358
	3.66	0.582298	0.42502		3.66	0.513071	0.369957		3.66	0.983235	0.697749
	3.721	0.583886	0.435325		3.721	0.464886	0.35882		3.721	0.975518	0.663729
	3.782	0.587055	0.443992		3.782	0.427863	0.355051		3.782	0.973388	0.627945
	3.843	0.587608	0.445737		3.843	0.399929	0.360824		3.843	0.982541	0.603655
	3.904	0.593698	0.447478		3.904	0.376647	0.368635		3.904	0.997435	0.592635
	3.965	0.606925	0.464996		3.965	0.358075	0.363898		3.965	1	0.593188
	4.026	0.615263	0.475875		4.026	0.3802	0.364529		4.026	1	0.603118
	4.087	0.593914	0.461953		4.087	0.400169	0.352729		4.087	0.999922	0.608357
	4.148	0.545063	0.428906		4.148	0.417306	0.331475		4.148	0.998408	0.61722
	4.209	0.493843	0.393498		4.209	0.429122	0.318847		4.209	0.993745	0.626196
	4.27	0.443275	0.362949		4.27	0.447686	0.321749		4.27	0.990788	0.641047
	4.331	0.402004	0.333451		4.331	0.45971	0.331384		4.331	0.989188	0.664149
	4.392	0.374729	0.314769		4.392	0.459094	0.336933		4.392	0.990922	0.689553
	4.453	0.368541	0.307694		4.453	0.459463	0.343267		4.453	0.992522	0.693965
	4.514	0.374031	0.309325		4.514	0.450894	0.338086		4.514	0.995333	0.675616
	4.575	0.389384	0.319624		4.575	0.443227	0.329141		4.575	0.99878	0.64678
	4.636	0.408533	0.329792		4.636	0.439537	0.318165		4.636	0.997506	0.618369
	4.697	0.425596	0.338651		4.697	0.424839	0.300361		4.697	0.99178	0.587282
	4.758	0.437804	0.343988		4.758	0.419824	0.290451		4.758	0.990337	0.568788
	4.819	0.449671	0.350855		4.819	0.429275	0.298376		4.819	0.995396	0.559816
	4.88	0.470424	0.359624		4.88	0.444651	0.311255		4.88	0.997929	0.545576
	4.941	0.509733	0.373122		4.941	0.469471	0.314843		4.941	0.99502	0.528737
	5.002	0.53758	0.38709		5.002	0.490392	0.305094		5.002	0.997682	0.523698
	5.063	0.557353	0.415035		5.063	0.481671	0.282204		5.063	0.997275	0.52351
	5.124	0.599984	0.458698		5.124	0.444671	0.25978		5.124	0.99951	0.549212
	5.185	0.658341	0.488984		5.185	0.393106	0.241345		5.185	0.999282	0.59042
	5.246	0.732769	0.516247		5.246	0.348302	0.23198		5.246	0.998608	0.644416
	5.307	0.812216	0.544741		5.307	0.328839	0.235063		5.307	0.998133	0.686447
	5.368	0.874616	0.567812		5.368	0.326808	0.247267		5.368	0.9926	0.702243
	5.429	0.897976	0.570941		5.429	0.325306	0.253902		5.429	0.97811	0.694471
	5.49	0.895278	0.558282		5.49	0.330584	0.265137		5.49	0.970773	0.672243
	5.551	0.8778	0.530953		5.551	0.351541	0.296357		5.551	0.967031	0.637302
	5.612	0.8588	0.514969		5.612	0.375643	0.332945		5.612	0.988518	0.643224
	5.673	0.844733	0.491478		5.673	0.394106	0.368988		5.673	0.995898	0.650529
	5.734	0.821678	0.466149		5.734	0.41089	0.399157		5.734	0.988431	0.649769
	5.795	0.805957	0.444827		5.795	0.420235	0.418549		5.795	0.989067	0.648227
	5.856	0.826078	0.44691		5.856	0.427345	0.426576		5.856	0.984757	0.64338
	5.917	0.895953	0.478678		5.917	0.445129	0.438224		5.917	0.982078	0.630698
	5.978	0.967475	0.515345		5.978	0.485459	0.458318		5.978	0.986596	0.627118
	6.039	0.991667	0.53602		6.039	0.536145	0.469596		6.039	0.995498	0.6464
	6.1	0.996765	0.560392		6.1	0.566725	0.465882		6.1	0.996169	0.664922
	6.161	0.987663	0.584706		6.161	0.565878	0.462675		6.161	0.995718	0.682294
	6.222	0.982506	0.59098		6.222	0.558161	0.478698		6.222	1	0.683702
	6.283	0.988882	0.587467		6.283	0.550067	0.493102		6.283	0.999243	0.657208
	6.344	0.987984	0.570416		6.344	0.540992	0.492522		6.344	0.988812	0.635973
	6.405	0.98102	0.539373		6.405	0.5364	0.477914		6.405	0.977906	0.640831
	6.466	0.971224	0.514341		6.466	0.538051	0.457729		6.466	0.981443	0.669875
	6.527	0.965514	0.507698		6.527	0.540098	0.43022		6.527	0.98691	0.704561
	6.588	0.968275	0.517545		6.588	0.554573	0.418851		6.588	0.990725	0.713533
	6.649	0.965027	0.526659		6.649	0.592518	0.43749		6.649	0.991635	0.682722
	6.71	0.959404	0.539647		6.71	0.633875	0.464165		6.71	0.989482	0.651969
	6.771	0.94718	0.547353		6.771	0.660682	0.476937		6.771	0.987937	0.638392
	6.832	0.926612	0.544322		6.832	0.698035	0.496459		6.832	0.986196	0.62549
	6.893	0.885216	0.51738		6.893	0.738455	0.517925		6.893	0.979392	0.605651
	6.954	0.832369	0.477588		6.954	0.768031	0.528122		6.954	0.986565	0.596435
	7.015	0.788635	0.444275		7.015	0.773388	0.506875		7.015	0.991522	0.585263
	7.076	0.769031	0.428024		7.076	0.752294	0.466475		7.076	0.992224	0.574471
	7.137	0.765337	0.434722		7.137	0.686082	0.422078		7.137	0.997012	0.575647
	7.198	0.760165	0.453643		7.198	0.585071	0.398561		7.198	0.997827	0.563718
	7.259	0.752204	0.48022		7.259	0.48629	0.399027		7.259	0.996569	0.56571
	7.32	0.774788	0.510173		7.32	0.422404	0.404239		7.32	0.993659	0.568698
	7.381	0.814898	0.531965		7.381	0.389455	0.411706		7.381	0.984416	0.557059
	7.442	0.838796	0.541416		7.442	0.366259	0.412478		7.442	0.98611	0.549439
	7.503	0.825192	0.523851		7.503	0.34718	0.397953		7.503	0.993012	0.553086
	7.564	0.809137	0.510537		7.564	0.346024	0.386706		7.564	0.983675	0.547898
	7.625	0.819741	0.527776		7.625	0.383243	0.399725		7.625	0.958349	0.531635
	7.686	0.838357	0.550808		7.686	0.454667	0.449153		7.686	0.929816	0.52309
	7.747	0.856106	0.567659		7.747	0.536812	0.512031		7.747	0.89262	0.510639
	7.808	0.870341	0.582945		7.808	0.609106	0.577922		7.808	0.851584	0.501467
	7.869	0.8944	0.602435		7.869	0.658502	0.639267		7.869	0.806114	0.487859
	7.93	0.902012	0.59638		7.93	0.664451	0.670345		7.93	0.768686	0.479631
	7.991	0.899467	0.592349		7.991	0.626192	0.667592		7.991	0.746004	0.472812
	8.052	0.882427	0.579929		8.052	0.563075	0.648918		8.052	0.73631	0.462604
	8.113	0.836627	0.550812		8.113	0.511835	0.634102		8.113	0.746498	0.462267
	8.174	0.783435	0.512157		8.174	0.472773	0.619443		8.174	0.755686	0.458165
	8.235	0.744349	0.484784		8.235	0.455608	0.595569		8.235	0.744624	0.437137
	8.296	0.737953	0.49011		8.296	0.462827	0.575749		8.296	0.715208	0.409988
	8.357	0.74191	0.507122		8.357	0.495471	0.576529		8.357	0.665196	0.377188
	8.418	0.734439	0.511416		8.418	0.521071	0.580373		8.418	0.598451	0.344941
	8.479	0.731086	0.507678		8.479	0.52218	0.57349		8.479	0.525322	0.318243
	8.54	0.716004	0.488631		8.54	0.509435	0.553165		8.54	0.4616	0.301494
	8.601	0.696353	0.475824		8.601	0.506643	0.543114		8.601	0.41651	0.298161
	8.662	0.683424	0.474404		8.662	0.522298	0.555824		8.662	0.388894	0.30529
	8.723	0.670145	0.476204		8.723	0.551416	0.591251		8.723	0.364404	0.292624
	8.784	0.665243	0.479886		8.784	0.571769	0.639251		8.784	0.33949	0.267729
	8.845	0.675835	0.487769		8.845	0.569122	0.687898		8.845	0.324188	0.25698
	8.906	0.701992	0.502698		8.906	0.564722	0.753118		8.906	0.314957	0.253847
	8.967	0.723612	0.499769		8.967	0.572918	0.836169		8.967	0.304404	0.247831
	9.028	0.754741	0.503659		9.028	0.592063	0.918176		9.028	0.287522	0.238761
	9.089	0.799933	0.523969		9.089	0.610188	0.971169		9.089	0.272553	0.228176
	9.15	0.827702	0.53349		9.15	0.610102	0.983906		9.15	0.267694	0.227471
	9.211	0.83151	0.5346		9.211	0.619941	0.98629		9.211	0.261902	0.225843
	9.272	0.826408	0.542161		9.272	0.637243	0.98991		9.272	0.248384	0.215216
	9.333	0.826376	0.565384		9.333	0.646584	0.993153		9.333	0.229918	0.198827
	9.394	0.821275	0.589067		9.394	0.639808	0.997471		9.394	0.222251	0.194678
	9.455	0.803522	0.589267		9.455	0.623388	0.999878		9.455	0.227957	0.203169
	9.516	0.777396	0.571149		9.516	0.596188	1		9.516	0.216498	0.200125
	9.577	0.730024	0.536435		9.577	0.566541	1		9.577	0.201831	0.190725
	9.638	0.671639	0.500655		9.638	0.547431	0.996604		9.638	0.207024	0.212655
	9.699	0.640663	0.487396		9.699	0.545114	0.989404		9.699	0.223239	0.280035
	9.76	0.634004	0.484831		9.76	0.561925	0.986855		9.76	0.26402	0.39329
	9.821	0.624647	0.478047		9.821	0.588906	0.990624		9.821	0.287341	0.442267
	9.882	0.615337	0.469804		9.882	0.609843	0.994153		9.882	0.272882	0.410243
	9.943	0.602173	0.45891		9.943	0.630204	0.994173		9.943	0.214035	0.315353
	10.004	0.590933	0.449522		10.004	0.633165	0.994416		10.004	0.169976	0.235306
	10.065	0.585502	0.446804		10.065	0.615165	0.994518		10.065	0.16009	0.192298
	10.126	0.575443	0.442906		10.126	0.57858	0.993702		10.126	0.159231	0.167051
	10.187	0.55889	0.434376		10.187	0.537804	0.992157		10.187	0.1668	0.156416
	10.248	0.53889	0.425478		10.248	0.503737	0.984631		10.248	0.178635	0.157306
	10.309	0.528153	0.427165		10.309	0.483412	0.976369		10.309	0.168941	0.147459
	10.37	0.538941	0.452945		10.37	0.481773	0.976741		10.37	0.160106	0.143267
	10.431	0.568875	0.498165		10.431	0.492486	0.983557		10.431	0.149612	0.142325
	10.492	0.595396	0.54389		10.492	0.514267	0.990408		10.492	0.141129	0.142996
	10.553	0.593745	0.565412		10.553	0.534824	0.991933		10.553	0.137647	0.148565
	10.614	0.571031	0.563675		10.614	0.541224	0.993596		10.614	0.138106	0.15351
	10.675	0.553686	0.550576		10.675	0.53678	0.993961		10.675	0.139188	0.157184
	10.736	0.553788	0.533529		10.736	0.528224	0.991769		10.736	0.141565	0.151027
	10.797	0.548396	0.505667		10.797	0.514408	0.991294		10.797	0.140322	0.1394
	10.858	0.535259	0.481592		10.858	0.504812	0.994106		10.858	0.138839	0.131525
	10.919	0.52731	0.471663		10.919	0.500494	0.997345		10.919	0.129706	0.124812
	10.98	0.514835	0.463075		10.98	0.495455	1		10.98	0.124396	0.121263
	11.041	0.495569	0.448008		11.041	0.478349	1		11.041	0.122549	0.123302
	11.102	0.468251	0.429839		11.102	0.459737	1		11.102	0.124835	0.1312
	11.163	0.442624	0.416157		11.163	0.439373	1		11.163	0.121561	0.133749
	11.224	0.431894	0.419494		11.224	0.416745	0.999627		11.224	0.113035	0.13198
	11.285	0.416624	0.419153		11.285	0.395655	0.997494		11.285	0.110188	0.136149
	11.346	0.389769	0.405945		11.346	0.381714	0.995961		11.346	0.111008	0.144482
	11.407	0.358031	0.387675		11.407	0.374455	0.995259		11.407	0.109984	0.147729
	11.468	0.328663	0.366886		11.468	0.370729	0.996518		11.468	0.112133	0.152976
	11.529	0.30729	0.351153		11.529	0.364122	0.997576		11.529	0.111725	0.154847
	11.59	0.29822	0.342773		11.59	0.361506	0.997973		11.59	0.110216	0.155537
	11.651	0.299282	0.339051		11.651	0.360686	0.998871		11.651	0.10649	0.152604
	11.712	0.307153	0.333243		11.712	0.36129	0.998137		11.712	0.101882	0.148369
	11.773	0.316412	0.320055		11.773	0.362137	0.996976		11.773	0.094337	0.147157
	11.834	0.334094	0.321184		11.834	0.361525	0.995918		11.834	0.088882	0.154361
	11.895	0.351698	0.332643		11.895	0.355933	0.992816		11.895	0.091525	0.159075
	11.956	0.36942	0.358384		11.956	0.349624	0.991051		11.956	0.10469	0.158906
	12.017	0.399776	0.401137		12.017	0.343478	0.991082		12.017	0.123133	0.159192
	12.078	0.437157	0.448149		12.078	0.335973	0.991988		12.078	0.135031	0.157525
	12.139	0.468247	0.474471		12.139	0.33078	0.995149		12.139	0.141431	0.159169
	12.2	0.481576	0.464106		12.2	0.325027	0.998459		12.2	0.142506	0.161729
	12.261	0.496702	0.441392		12.261	0.321831	0.999275		12.261	0.138259	0.162514
	12.322	0.529322	0.425412		12.322	0.318839	1		12.322	0.136384	0.16429
	12.383	0.57731	0.419914		12.383	0.312239	1		12.383	0.141929	0.168827
	12.444	0.659286	0.453082		12.444	0.305212	1		12.444	0.158157	0.180639
	12.505	0.748686	0.502765		12.505	0.30038	0.999698		12.505	0.173243	0.185553
	12.566	0.81849	0.556651		12.566	0.292314	0.997882		12.566	0.180965	0.182035
	12.627	0.868482	0.608859		12.627	0.280655	0.996588		12.627	0.188149	0.177525
	12.688	0.869827	0.639984		12.688	0.27302	0.999012		12.688	0.203047	0.182737
	12.749	0.815306	0.629329		12.749	0.271184	0.999765		12.749	0.221467	0.192031
	12.81	0.733827	0.605353		12.81	0.270796	1		12.81	0.23311	0.198569
	12.871	0.691714	0.624361		12.871	0.270914	1		12.871	0.23929	0.205039
	12.932	0.6808	0.656729		12.932	0.270455	1		12.932	0.243188	0.211749
	12.993	0.663761	0.634267		12.993	0.269988	1		12.993	0.252741	0.220271
	13.054	0.633529	0.554098		13.054	0.273224	1		13.054	0.267929	0.231216
	13.115	0.607757	0.49342		13.115	0.279745	1		13.115	0.28518	0.241863
	13.176	0.576247	0.452455		13.176	0.287502	0.999843		13.176	0.308969	0.249651
	13.237	0.553875	0.431329		13.237	0.297157	0.998478		13.237	0.334957	0.254373
	13.298	0.543337	0.425824		13.298	0.306341	0.99829		13.298	0.361149	0.25258
	13.359	0.537329	0.427247		13.359	0.3154	0.998722		13.359	0.38391	0.245247
	13.42	0.526549	0.432325		13.42	0.321863	0.999071		13.42	0.413608	0.241631
	13.481	0.508624	0.429859		13.481	0.325173	0.998902		13.481	0.451439	0.246455
	13.542	0.464333	0.410988		13.542	0.327282	0.999839		13.542	0.497757	0.2638
	13.603	0.423125	0.394961		13.603	0.326816	1		13.603	0.54082	0.284008
	13.664	0.392827	0.382275		13.664	0.326745	1		13.664	0.585337	0.311863
	13.725	0.367824	0.366314		13.725	0.325553	1		13.725	0.654722	0.368333
	13.786	0.346027	0.345961		13.786	0.323133	0.999859		13.786	0.742357	0.447529
	13.847	0.330922	0.32509		13.847	0.321349	0.998082		13.847	0.799357	0.482216
	13.908	0.322808	0.30651		13.908	0.31622	0.9962		13.908	0.827427	0.455027
	13.969	0.312098	0.294227		13.969	0.311106	0.992337		13.969	0.865612	0.436106
	14.03	0.298725	0.283196		14.03	0.307341	0.991212		14.03	0.86511	0.420051
	14.091	0.297851	0.277325		14.091	0.306867	0.992322		14.091	0.8392	0.405192
	14.152	0.318529	0.273929		14.152	0.309937	0.993973		14.152	0.818275	0.399663
	14.213	0.351812	0.27518		14.213	0.311522	0.995941		14.213	0.812529	0.407376
	14.274	0.397	0.288239		14.274	0.315702	0.997314		14.274	0.810686	0.421867
	14.335	0.455557	0.323518		14.335	0.3204	0.998663		14.335	0.814349	0.439106
	14.396	0.514639	0.378655		14.396	0.326024	0.999945		14.396	0.817247	0.45369
	14.457	0.550761	0.426298		14.457	0.327776	0.999435		14.457	0.789294	0.43789
	14.518	0.559102	0.463765		14.518	0.332259	0.999341		14.518	0.746729	0.41269
	14.579	0.547322	0.491827		14.579	0.331694	0.998325		14.579	0.719957	0.39611
	14.64	0.525953	0.51231		14.64	0.331376	0.998247		14.64	0.721388	0.409353
	14.701	0.527075	0.547329		14.701	0.32829	0.998404		14.701	0.733816	0.42349
	14.762	0.544914	0.58071		14.762	0.317306	0.998918		14.762	0.733659	0.414231
	14.823	0.578894	0.606063		14.823	0.309737	0.998573		14.823	0.734361	0.396643
	14.884	0.636125	0.621518		14.884	0.300639	0.997906		14.884	0.765863	0.394898
	14.945	0.700631	0.625706		14.945	0.291384	0.996878		14.945	0.81398	0.399337
	15.006	0.755973	0.610502		15.006	0.279306	0.996671		15.006	0.848333	0.406475
	15.067	0.805522	0.588792		15.067	0.2734	0.997314		15.067	0.865925	0.419133
	15.128	0.851988	0.578882		15.128	0.271941	0.996984		15.128	0.892667	0.440682
	15.189	0.886796	0.586388		15.189	0.27978	0.995102		15.189	0.934102	0.474702
	15.25	0.8554	0.557706		15.25	0.291792	0.984345		15.25	0.970945	0.508922
	15.311	0.799071	0.52889		15.311	0.295757	0.943773		15.311	0.985141	0.51809
	15.372	0.762384	0.534592		15.372	0.239184	0.82869		15.372	0.977337	0.504667
	15.433	0.747333	0.551804		15.433	0.19111	0.707133		15.433	0.97398	0.50018
	15.494	0.744322	0.569255		15.494	0.137227	0.582678		15.494	0.941216	0.485024
	15.555	0.764702	0.588749		15.555	0.111067	0.488792		15.555	0.909043	0.479502
	15.616	0.812569	0.626373		15.616	0.130463	0.446271		15.616	0.868463	0.468047
	15.677	0.8712	0.673737		15.677	0.144078	0.412451		15.677	0.806027	0.432388
	15.738	0.912024	0.703482		15.738	0.141537	0.372443		15.738	0.769008	0.410592
	15.799	0.934063	0.714424		15.799	0.14162	0.343773		15.799	0.763404	0.404424
	15.86	0.932169	0.704827		15.86	0.148722	0.329953		15.86	0.766286	0.395561
	15.921	0.902286	0.667541		15.921	0.149169	0.317631		15.921	0.78529	0.395992
	15.982	0.852796	0.611984		15.982	0.145251	0.311396		15.982	0.819408	0.413831
	16.043	0.799396	0.554396		16.043	0.142188	0.311318		16.043	0.87098	0.447439
	16.104	0.747345	0.502373		16.104	0.136204	0.308063		16.104	0.91849	0.477024
	16.165	0.718031	0.471706		16.165	0.128392	0.300494		16.165	0.948196	0.500341
	16.226	0.700353	0.453804		16.226	0.123647	0.297267		16.226	0.926514	0.490255
	16.287	0.6926	0.447635		16.287	0.131275	0.309478		16.287	0.864463	0.452776
	16.348	0.685522	0.439867		16.348	0.148737	0.332463		16.348	0.80031	0.420141
	16.409	0.664275	0.430824		16.409	0.164651	0.352925		16.409	0.749863	0.404749
	16.47	0.63529	0.430706		16.47	0.164329	0.356114		16.47	0.714463	0.406463
	16.531	0.594576	0.422055		16.531	0.15909	0.354129		16.531	0.706643	0.432412
	16.592	0.535325	0.3914		16.592	0.16038	0.356443		16.592	0.669392	0.425725
	16.653	0.487553	0.364863		16.653	0.160765	0.357839		16.653	0.62151	0.398533
	16.714	0.468004	0.363518		16.714	0.154796	0.353243		16.714	0.583478	0.370263
	16.775	0.471216	0.384039		16.775	0.147259	0.347016		16.775	0.574686	0.364831
	16.836	0.477502	0.40582		16.836	0.148271	0.348451		16.836	0.59122	0.378776
	16.897	0.471271	0.423851		16.897	0.147929	0.348537		16.897	0.597988	0.378949
	16.958	0.454506	0.430561		16.958	0.139769	0.344369		16.958	0.585031	0.366439
	17.019	0.424749	0.420467		17.019	0.132678	0.340573		17.019	0.557322	0.367435
	17.08	0.397071	0.392741		17.08	0.136976	0.345435		17.08	0.505898	0.382718
	17.141	0.363784	0.346282		17.141	0.141729	0.348855		17.141	0.461098	0.406341
	17.202	0.334439	0.293816		17.202	0.136906	0.345961		17.202	0.41222	0.405435
	17.263	0.313016	0.251812		17.263	0.130357	0.340443		17.263	0.379745	0.400008
	17.324	0.286314	0.225075		17.324	0.129718	0.341784		17.324	0.378008	0.413024
	17.385	0.250086	0.210824		17.385	0.143839	0.35709		17.385	0.388196	0.422776
	17.446	0.230969	0.204992		17.446	0.165922	0.380686		17.446	0.392251	0.418192
	17.507	0.236439	0.20531		17.507	0.179157	0.396788		17.507	0.411278	0.430114
	17.568	0.223173	0.194443		17.568	0.189482	0.411282		17.568	0.424655	0.444043
	17.629	0.204263	0.182682		17.629	0.18758	0.413012		17.629	0.4154	0.445004
	17.69	0.185239	0.174318		17.69	0.165318	0.395514		17.69	0.40718	0.451565
	17.751	0.17169	0.168082		17.751	0.152463	0.388796		17.751	0.406953	0.467176
	17.812	0.160796	0.168176		17.812	0.16238	0.398933		17.812	0.41511	0.483341
	17.873	0.14902	0.168416		17.873	0.168769	0.404659		17.873	0.40829	0.475941
	17.934	0.138561	0.169212		17.934	0.165612	0.403016		17.934	0.380753	0.442224
	17.995	0.126247	0.16898		17.995	0.151192	0.387718		17.995	0.351294	0.401388
	18.056	0.12351	0.173416		18.056	0.13442	0.360996		18.056	0.331392	0.376906
	18.117	0.119992	0.173922		18.117	0.13769	0.354851		18.117	0.3338	0.376141
	18.178	0.113047	0.165718		18.178	0.145498	0.352012		18.178	0.338349	0.37029
	18.239	0.108592	0.157898		18.239	0.141055	0.341459		18.239	0.354576	0.372271
	18.3	0.105231	0.150027		18.3	0.124145	0.322557		18.3	0.373941	0.386412
	18.361	0.101584	0.139914		18.361	0.11942	0.314027		18.361	0.388043	0.404447
	18.422	0.098745	0.130404		18.422	0.131737	0.323573		18.422	0.40138	0.431569
	18.483	0.098875	0.124996		18.483	0.148541	0.338071		18.483	0.419961	0.467518
	18.544	0.102337	0.1226		18.544	0.147714	0.334537		18.544	0.438922	0.502008
	18.605	0.097584	0.11629		18.605	0.139647	0.324463		18.605	0.449169	0.52298
	18.666	0.089122	0.111259		18.666	0.149165	0.333831		18.666	0.468635	0.546604
	18.727	0.082204	0.118231		18.727	0.1548	0.340388		18.727	0.503424	0.578388
	18.788	0.072059	0.12018		18.788	0.157082	0.348392		18.788	0.546871	0.607165
	18.849	0.05529	0.121298		18.849	0.162094	0.356988		18.849	0.606635	0.637827
	18.91	0.039435	0.121353		18.91	0.163	0.361561		18.91	0.64462	0.635875
	18.971	0.027341	0.124094		18.971	0.168863	0.371933		18.971	0.669012	0.612329
	19.032	0.020945	0.124718		19.032	0.185682	0.392741		19.032	0.722361	0.619494
	19.093	0.022129	0.126275		19.093	0.197333	0.405875		19.093	0.803902	0.651455
	19.154	0.032969	0.132925		19.154	0.199871	0.406349		19.154	0.867761	0.655
	19.215	0.040314	0.129031		19.215	0.190541	0.393969		19.215	0.87851	0.62609
	19.276	0.042282	0.12158		19.276	0.185388	0.389216		19.276	0.848718	0.586396
	19.337	0.053075	0.125659		19.337	0.182224	0.392882		19.337	0.797557	0.541741
	19.398	0.066384	0.136263		19.398	0.178463	0.396886		19.398	0.755016	0.507839
	19.459	0.071153	0.141141		19.459	0.166263	0.396533		19.459	0.719784	0.478663
	19.52	0.068286	0.134996		19.52	0.15389	0.394059		19.52	0.693886	0.444867
	19.581	0.057475	0.12242		19.581	0.146396	0.392784		19.581	0.694067	0.42851
	19.642	0.049384	0.111984		19.642	0.149365	0.396412		19.642	0.729216	0.437443
	19.703	0.050275	0.112851		19.703	0.148925	0.388302		19.703	0.765098	0.443498
	19.764	0.050412	0.119365		19.764	0.153063	0.379035		19.764	0.815118	0.465408
	19.825	0.034494	0.113796		19.825	0.171902	0.380694		19.825	0.853235	0.481192
	19.886	0.028808	0.111373		19.886	0.180169	0.378565		19.886	0.863388	0.475933
	19.947	0.035996	0.115467		19.947	0.196165	0.383898		19.947	0.868031	0.471992
	20.008	0.04518	0.118647		20.008	0.213263	0.396118		20.008	0.895455	0.490639
	20.069	0.050706	0.118149		20.069	0.22338	0.407788		20.069	0.913969	0.499788
	20.13	0.050467	0.113035		20.13	0.213812	0.405294		20.13	0.897694	0.476851
	20.191	0.048737	0.108133		20.191	0.196373	0.395498		20.191	0.840365	0.445082
	20.252	0.049875	0.108137		20.252	0.18602	0.388522		20.252	0.741808	0.408412
	20.313	0.055082	0.112859		20.313	0.186663	0.386251		20.313	0.679392	0.386631
	20.374	0.059169	0.11762		20.374	0.194376	0.387973		20.374	0.677149	0.384184
	20.435	0.057918	0.115655		20.435	0.2054	0.396722		20.435	0.695447	0.387961
	20.496	0.06171	0.119494		20.496	0.208863	0.399169		20.496	0.701647	0.38218
	20.557	0.06982	0.125733		20.557	0.202353	0.390216		20.557	0.68538	0.367165
	20.618	0.07389	0.127169		20.618	0.190835	0.375788		20.618	0.655498	0.349996
	20.679	0.072325	0.122047		20.679	0.188216	0.367761		20.679	0.624549	0.344549
	20.74	0.069106	0.114875		20.74	0.186882	0.36269		20.74	0.605678	0.358588
	20.801	0.068584	0.112541		20.801	0.186988	0.358333		20.801	0.595835	0.371208
	20.862	0.069925	0.116753		20.862	0.183667	0.355506		20.862	0.572286	0.366427
	20.923	0.063141	0.11942		20.923	0.179518	0.351498		20.923	0.570463	0.370431
	20.984	0.053616	0.120812		20.984	0.178	0.355835		20.984	0.592976	0.388525
	21.045	0.052886	0.121867		21.045	0.187286	0.375757		21.045	0.63142	0.413835
	21.106	0.053502	0.123247		21.106	0.20498	0.400569		21.106	0.681729	0.446557
	21.167	0.05378	0.128169		21.167	0.204031	0.412208		21.167	0.744953	0.4824
	21.228	0.059557	0.133031		21.228	0.183706	0.400961		21.228	0.817369	0.507231
	21.289	0.072933	0.138808		21.289	0.167584	0.394059		21.289	0.854251	0.494137
	21.35	0.096439	0.14998		21.35	0.185592	0.415914		21.35	0.843878	0.457361
	21.411	0.118769	0.158251		21.411	0.195494	0.425157		21.411	0.816306	0.421467
	21.472	0.142153	0.164275		21.472	0.198376	0.427906		21.472	0.80111	0.39478
	21.533	0.176035	0.1834		21.533	0.205737	0.429169		21.533	0.799322	0.37549
	21.594	0.202255	0.192404		21.594	0.204737	0.419165		21.594	0.8008	0.360098
	21.655	0.223624	0.196765		21.655	0.202349	0.401376		21.655	0.829522	0.370702
	21.716	0.248647	0.201706		21.716	0.203588	0.390027		21.716	0.883812	0.4052
	21.777	0.277455	0.209749		21.777	0.208259	0.386067		21.777	0.912769	0.420639
	21.838	0.307118	0.21742		21.838	0.219914	0.389659		21.838	0.906047	0.405325
	21.899	0.332749	0.21971						21.899	0.884643	0.382741
	21.96	0.351678	0.220898						21.96	0.847227	0.354984
	22.021	0.359047	0.236812						22.021	0.797996	0.320678
	22.082	0.352639	0.257153						22.082	0.74602	0.290333
	22.143	0.369365	0.283145						22.143	0.729835	0.301118
	22.204	0.445702	0.32342						22.204	0.758545	0.360624
	22.265	0.573267	0.376804						22.265	0.797329	0.421706
	22.326	0.706957	0.433404						22.326	0.86231	0.471298
	22.387	0.817122	0.475682						22.387	0.926314	0.510702
	22.448	0.874192	0.4932						22.448	0.937102	0.515506
	22.509	0.863325	0.488263						22.509	0.931161	0.499827
	22.57	0.817298	0.483941						22.57	0.904271	0.472482
	22.631	0.764835	0.494224						22.631	0.873729	0.443322
	22.692	0.709557	0.504898						22.692	0.829325	0.409365
	22.753	0.659345	0.506396						22.753	0.762435	0.367173
	22.814	0.61569	0.486969						22.814	0.6864	0.330278
	22.875	0.590027	0.451475						22.875	0.634871	0.326522
	22.936	0.592973	0.420047						22.936	0.588263	0.332961
	22.997	0.620463	0.405667						22.997	0.543569	0.333471
	23.058	0.660086	0.407102						23.058	0.511451	0.330231
