# Supplementary material for: Interleukin-1 prevents SARS-CoV-2-induced membrane fusion to restrict viral transmission via induction of actin bundles
Source: eLife. 2025 Feb 12;13:RP98593. doi: 10.7554/eLife.98593 (PMC11820142; doi:10.7554/eLife.98593)
Supplement: Figure 7—figure supplement 1—source data 1. [file elife-98593-fig7-figsupp1-data1.xlsx]

## Sheet: Figure 7—figure supplement 1B
Body weight (％)	PBS									mIL-1β									Y-27632 + mIL-1β
2024/9/20-0 dpi	100	100	100	100	100	100	100	100		100	100	100	100	100	100	100	100		100	100	100	100	100	100	100	100
2024/9/21-1 dpi	98.2558	92.2619	96.988	95.3488	95.6044	95.7831	96.0674	91.954		95.7055	91.573	100.606	94.3503	103.468	105.161	93.9759	96.319		101.143	94.0476	95.2128	93.2203	97.093	97.093	94.9153	95.5056
2024/9/22-2 dpi	86.0465	93.4524	99.3976	94.186	93.956	94.5783	97.191	94.2529		95.7055	92.6966	99.3939	94.9153	102.89	102.581	101.205	95.7055		98.8571	92.8571	94.1489	91.5254	97.093	97.093	94.9153	96.0674
2024/9/23-3 dpi	94.186	88.0952	95.1807	92.4419	93.4066	93.3735	94.382	93.1034		93.865	91.573	100.606	89.2655	97.1098	98.0645	89.759	93.2515		93.1429	89.881	90.4255	87.5706	88.3721	90.1163	92.6554	89.3258
2024/9/24-4 dpi	95.9302	88.6905	96.3855	95.9302	95.0549	95.7831	96.0674	96.5517		96.9325	92.6966	99.3939	92.6554	100.578	98.0645	92.1687	92.638		97.1429	94.0476	90.4255	90.9605	91.2791	95.3488	92.0904	93.2584

## Sheet: Figure 7—figure supplement 1C
Body weight (％)	PBS					Y-27632 + mIL-1β
2024/3/8-D0	100	100	100	100		100	100	100	100
2024/3/9-D1	103.75	103.378	97.973	99.3548		99.3711	102.548	100.662	104.636
2024/3/10-D2	103.75	105.405	100.676	98.7097		100.629	101.911	101.325	103.974
2024/3/11-D3	103.75	106.757	101.351	99.3548		101.887	103.822	102.649	105.298
