# Supplementary material for: Interleukin-1 prevents SARS-CoV-2-induced membrane fusion to restrict viral transmission via induction of actin bundles
Source: eLife. 2025 Feb 12;13:RP98593. doi: 10.7554/eLife.98593 (PMC11820142; doi:10.7554/eLife.98593)
Supplement: Figure 7—figure supplement 2—source data 3. [file elife-98593-fig7-figsupp2-data3.xlsx]

## Sheet: Figure 7—figure supplement 2A
2024-10-18
Normalized intensity
	PBS				mIL-1β				Y-27632 + mIL-1β
	Length	N	F-actin		Length	N	F-actin		Length	N	F-actin
	0	0.627451	0.194922		0	0.350757	0.170557		0	0.972996	0.316561
	0.061	0.738192	0.219863		0.061	0.320075	0.172808		0.061	0.989604	0.373141
	0.122	0.788875	0.218255		0.122	0.285102	0.173243		0.122	0.986129	0.389141
	0.183	0.807506	0.233749		0.183	0.269341	0.180749		0.183	0.988349	0.414439
	0.244	0.858537	0.259125		0.244	0.282765	0.194376		0.244	0.984675	0.428259
	0.305	0.877882	0.272929		0.305	0.318741	0.208643		0.305	0.994365	0.462522
	0.366	0.918561	0.271263		0.366	0.350016	0.207741		0.366	0.989451	0.484318
	0.427	0.878353	0.236584		0.427	0.39269	0.220647		0.427	0.983525	0.472573
	0.488	0.897792	0.244737		0.488	0.437745	0.2408		0.488	0.979949	0.457816
	0.549	0.974255	0.245596		0.549	0.4546	0.234102		0.549	0.9818	0.457592
	0.61	0.978141	0.227192		0.61	0.489714	0.232925		0.61	0.982671	0.467631
	0.671	0.9774	0.21682		0.671	0.561322	0.244008		0.671	0.99129	0.48949
	0.732	0.971831	0.241075		0.732	0.649306	0.252914		0.732	0.991933	0.48002
	0.793	0.970263	0.239714		0.793	0.749	0.270906		0.793	0.979875	0.443871
	0.854	0.988157	0.255051		0.854	0.817357	0.282569		0.854	0.985392	0.445929
	0.915	0.999965	0.240773		0.915	0.849992	0.283902		0.915	0.987043	0.459031
	0.976	0.933275	0.226937		0.976	0.902263	0.311447		0.976	0.978157	0.458776
	1.037	0.95362	0.237588		1.037	0.941208	0.342914		1.037	0.98662	0.481416
	1.098	0.96109	0.275141		1.098	0.962533	0.370545		1.098	0.990267	0.497137
	1.159	0.967196	0.263427		1.159	0.977882	0.398498		1.159	0.982894	0.492478
	1.22	0.946392	0.284157		1.22	0.98618	0.411725		1.22	0.979008	0.500169
	1.281	0.897298	0.304098		1.281	0.991388	0.430792		1.281	0.973827	0.506671
	1.342	0.876129	0.309204		1.342	0.995592	0.452365		1.342	0.985094	0.546627
	1.403	0.854004	0.320451		1.403	0.994188	0.465243		1.403	0.987431	0.577914
	1.464	0.862412	0.315235		1.464	0.993102	0.473957		1.464	0.988259	0.607016
	1.525	0.872408	0.309196		1.525	0.99138	0.470024		1.525	0.992996	0.647698
	1.586	0.8704	0.315227		1.586	0.995086	0.462737		1.586	0.987361	0.663659
	1.647	0.85891	0.315278		1.647	0.995612	0.433176		1.647	0.989396	0.691078
	1.708	0.857863	0.313584		1.708	0.992459	0.390973		1.708	0.98971	0.708965
	1.769	0.87611	0.328122		1.769	0.990243	0.354855		1.769	0.984231	0.727737
	1.83	0.837624	0.325031		1.83	0.99071	0.32909		1.83	0.98622	0.753271
	1.891	0.841176	0.312031		1.891	0.992212	0.313447		1.891	0.982635	0.739561
	1.952	0.908188	0.316004		1.952	0.990694	0.300831		1.952	0.990569	0.728635
	2.013	0.926059	0.314576		2.013	0.993961	0.292275		2.013	0.988247	0.706161
	2.074	0.950686	0.318776		2.074	0.992439	0.277737		2.074	0.983153	0.688855
	2.135	0.945537	0.303227		2.135	0.991318	0.274102		2.135	0.989714	0.669514
	2.196	0.889208	0.295514		2.196	0.987976	0.271016		2.196	0.989294	0.628314
	2.257	0.835314	0.295525		2.257	0.992443	0.27462		2.257	0.972173	0.569949
	2.318	0.907286	0.311796		2.318	0.993663	0.272808		2.318	0.935957	0.490855
	2.379	0.895255	0.307157		2.379	0.990714	0.266125		2.379	0.873792	0.412475
	2.44	0.765725	0.290561		2.44	0.992404	0.275878		2.44	0.805298	0.366616
	2.501	0.772208	0.307157		2.501	0.99318	0.286596		2.501	0.723902	0.330216
	2.562	0.732812	0.27389		2.562	0.993098	0.288043		2.562	0.647263	0.29671
	2.623	0.772973	0.260686		2.623	0.99429	0.278408		2.623	0.618624	0.298522
	2.684	0.886392	0.260329		2.684	0.992843	0.265361		2.684	0.579106	0.265404
	2.745	0.874471	0.264129		2.745	0.991749	0.249231		2.745	0.561031	0.256447
	2.806	0.877706	0.253043		2.806	0.991035	0.234196		2.806	0.561404	0.282894
	2.867	0.834796	0.230596		2.867	0.990761	0.218518		2.867	0.525659	0.274878
	2.928	0.862129	0.263502		2.928	0.989431	0.220302		2.928	0.483337	0.258329
	2.989	0.851961	0.286349		2.989	0.995118	0.230647		2.989	0.480482	0.286369
	3.05	0.783188	0.293278		3.05	0.995188	0.23691		3.05	0.481263	0.312475
	3.111	0.637196	0.276659		3.111	0.990188	0.237988		3.111	0.487196	0.3216
	3.172	0.649063	0.300949		3.172	0.995843	0.256804		3.172	0.540216	0.357745
	3.233	0.568204	0.290176		3.233	0.996565	0.272827		3.233	0.634114	0.431988
	3.294	0.61122	0.315388		3.294	0.988424	0.273624		3.294	0.674169	0.431886
	3.355	0.613988	0.297561		3.355	0.988882	0.301514		3.355	0.7504	0.438973
	3.416	0.631051	0.320125		3.416	0.973106	0.308125		3.416	0.858063	0.472357
	3.477	0.669976	0.331322		3.477	0.947639	0.30042		3.477	0.926616	0.4894
	3.538	0.695631	0.326212		3.538	0.934278	0.294392		3.538	0.934894	0.46431
	3.599	0.736447	0.32178		3.599	0.917145	0.273949		3.599	0.945776	0.457169
	3.66	0.727878	0.334537		3.66	0.924482	0.276973		3.66	0.958443	0.461137
	3.721	0.774514	0.353604		3.721	0.891675	0.270129		3.721	0.919102	0.432094
	3.782	0.710894	0.357427		3.782	0.831847	0.273973		3.782	0.877725	0.438251
	3.843	0.7018	0.3526		3.843	0.751	0.270722		3.843	0.793353	0.442165
	3.904	0.756467	0.358196		3.904	0.6484	0.242816		3.904	0.668325	0.412898
	3.965	0.780545	0.349906		3.965	0.592843	0.230173		3.965	0.618396	0.433173
	4.026	0.768451	0.33411		4.026	0.598749	0.224286		4.026	0.593792	0.456337
	4.087	0.75071	0.330486		4.087	0.643843	0.223373		4.087	0.554902	0.466557
	4.148	0.741051	0.327008		4.148	0.710631	0.224933		4.148	0.494212	0.456765
	4.209	0.719663	0.344482		4.209	0.751325	0.206753		4.209	0.43962	0.437224
	4.27	0.696	0.347882		4.27	0.766949	0.201655		4.27	0.401678	0.4108
	4.331	0.694078	0.339592		4.331	0.744235	0.194455		4.331	0.367965	0.371675
	4.392	0.656827	0.317792		4.392	0.681541	0.169922		4.392	0.328784	0.324275
	4.453	0.583012	0.315051		4.453	0.61351	0.151976		4.453	0.27631	0.266318
	4.514	0.504306	0.282902		4.514	0.562588	0.144875		4.514	0.20778	0.208631
	4.575	0.444537	0.280549		4.575	0.528612	0.141761		4.575	0.136588	0.15791
	4.636	0.439878	0.262584		4.636	0.501373	0.142106		4.636	0.0961098	0.139906
	4.697	0.486153	0.225208		4.697	0.481255	0.138153		4.697	0.0813098	0.144518
	4.758	0.482859	0.234243		4.758	0.461816	0.137714		4.758	0.0753686	0.145761
	4.819	0.498361	0.252063		4.819	0.426169	0.13389		4.819	0.0917686	0.166392
	4.88	0.480808	0.241435		4.88	0.366733	0.123035		4.88	0.0904706	0.164361
	4.941	0.480753	0.255969		4.941	0.296188	0.121573		4.941	0.0963137	0.167259
	5.002	0.422027	0.262749		5.002	0.224929	0.123671		5.002	0.152224	0.208863
	5.063	0.416929	0.267612		5.063	0.175831	0.126925		5.063	0.206059	0.232459
	5.124	0.405604	0.271298		5.124	0.154239	0.133345		5.124	0.255435	0.247376
	5.185	0.404784	0.27758		5.185	0.158937	0.129537		5.185	0.323863	0.28271
	5.246	0.362867	0.276616		5.246	0.198271	0.123192		5.246	0.376745	0.303961
	5.307	0.406929	0.287635		5.307	0.292184	0.121051		5.307	0.3996	0.291553
	5.368	0.355329	0.294		5.368	0.454769	0.128282		5.368	0.432125	0.292957
	5.429	0.438	0.313592		5.429	0.62498	0.147231		5.429	0.406686	0.249757
	5.49	0.425525	0.294573		5.49	0.753969	0.162863		5.49	0.398216	0.231682
	5.551	0.425251	0.297855		5.551	0.850314	0.177278		5.551	0.39889	0.244075
	5.612	0.518631	0.307584		5.612	0.894459	0.182173		5.612	0.346612	0.22918
	5.673	0.505906	0.298682		5.673	0.908529	0.186631		5.673	0.276757	0.203039
	5.734	0.497255	0.288824		5.734	0.902871	0.192816		5.734	0.238651	0.201188
	5.795	0.409075	0.27191		5.795	0.892922	0.208486		5.795	0.184592	0.179624
	5.856	0.479851	0.249047		5.856	0.887259	0.218886		5.856	0.155839	0.173137
	5.917	0.482486	0.242431		5.917	0.890792	0.225769		5.917	0.132314	0.165475
	5.978	0.629412	0.267043		5.978	0.89442	0.23062		5.978	0.104729	0.155157
	6.039	0.770792	0.276859		6.039	0.899216	0.22858		6.039	0.0670118	0.1344
	6.1	0.846231	0.284851		6.1	0.922855	0.243404		6.1	0.0595922	0.142749
	6.161	0.837714	0.278945		6.161	0.906082	0.241224		6.161	0.0357098	0.130443
	6.222	0.704	0.271404		6.222	0.851929	0.245302		6.222	0.0338392	0.134478
	6.283	0.529059	0.231635		6.283	0.775737	0.264078		6.283	0.0412784	0.144086
	6.344	0.4412	0.229106		6.344	0.618925	0.285125		6.344	0.0420784	0.145592
	6.405	0.270008	0.198384		6.405	0.378392	0.282831		6.405	0.0570431	0.162694
	6.466	0.272788	0.186745		6.466	0.201847	0.291404		6.466	0.0723255	0.184584
	6.527	0.247635	0.162882		6.527	0.129533	0.31889		6.527	0.0538588	0.168671
	6.588	0.286702	0.155337		6.588	0.103929	0.346973		6.588	0.0604157	0.178298
	6.649	0.272275	0.149145		6.649	0.0899098	0.358718		6.649	0.0820431	0.197824
	6.71	0.265447	0.143404		6.71	0.0995529	0.385455		6.71	0.0756471	0.192176
	6.771	0.226749	0.119627		6.771	0.103016	0.410949		6.771	0.0942941	0.226204
	6.832	0.218325	0.119173		6.832	0.113843	0.448627		6.832	0.0969176	0.246522
	6.893	0.211361	0.103396		6.893	0.134016	0.496678		6.893	0.110024	0.275224
	6.954	0.178506	0.0961608		6.954	0.132404	0.518282		6.954	0.0966745	0.279851
	7.015	0.167184	0.0870471		7.015	0.13811	0.541561		7.015	0.103694	0.308306
	7.076	0.137549	0.0884353		7.076	0.140639	0.556224		7.076	0.108925	0.325404
	7.137	0.0987804	0.0721294		7.137	0.130318	0.549882		7.137	0.115784	0.33122
	7.198	0.0712784	0.0683373		7.198	0.141224	0.56169		7.198	0.101216	0.310196
	7.259	0.0555216	0.0472314		7.259	0.138878	0.561059		7.259	0.131349	0.339396
	7.32	0.0880314	0.0422392		7.32	0.140627	0.565416		7.32	0.140678	0.337353
	7.381	0.121682	0.0391333		7.381	0.151898	0.580808		7.381	0.163882	0.3508
	7.442	0.11369	0.0342353		7.442	0.147973	0.580533		7.442	0.173914	0.35378
	7.503	0.106753	0.0373882		7.503	0.141212	0.575933		7.503	0.179502	0.354859
	7.564	0.0853176	0.0406745		7.564	0.150847	0.583835		7.564	0.187804	0.363098
	7.625	0.0497255	0.0245451		7.625	0.13951	0.57082		7.625	0.1868	0.367773
	7.686	0.0426157	0.0318902		7.686	0.145329	0.578827		7.686	0.194922	0.377353
	7.747	0.0191059	0.0291922		7.747	0.144596	0.586345		7.747	0.195918	0.360957
	7.808	0.00127451	0.0246863		7.808	0.154173	0.608937		7.808	0.188737	0.320341
	7.869	0.0105922	0.0245176		7.869	0.157322	0.626176		7.869	0.217396	0.310608
	7.93	0.0244353	0.0271176		7.93	0.162196	0.649918		7.93	0.228831	0.279475
	7.991	0.0015451	0.0193608		7.991	0.166278	0.670643		7.991	0.243275	0.2638
	8.052	0.0095451	0.0236588		8.052	0.167161	0.68598		8.052	0.250816	0.252137
	8.113	0.00630196	0.020749		8.113	0.172388	0.704141		8.113	0.260859	0.248133
	8.174	0.00776078	0.0182078		8.174	0.178749	0.728255		8.174	0.285471	0.262239
	8.235	0.000827451	0.0162118		8.235	0.190231	0.764765		8.235	0.296514	0.259867
	8.296	0.00378431	0.0245255		8.296	0.202224	0.801851		8.296	0.346537	0.284796
	8.357	0.000831373	0.0119765		8.357	0.207953	0.830925		8.357	0.399588	0.30411
	8.418	0.00743922	0.0108196		8.418	0.21331	0.861604		8.418	0.43218	0.301349
	8.479	0.00558039	0.0128549		8.479	0.229373	0.901451		8.479	0.489941	0.329537
	8.54	0.0024	0.011698		8.54	0.241341	0.931808		8.54	0.512549	0.340725
	8.601	0	0.00878431		8.601	0.237067	0.934831		8.601	0.540749	0.369851
	8.662	0.00258823	0.012549		8.662	0.2358	0.930392		8.662	0.578729	0.400349
	8.723	0.0207451	0.0133529		8.723	0.229573	0.918459		8.723	0.614431	0.416855
	8.784	0.0289333	0.0250902		8.784	0.226333	0.900098		8.784	0.66311	0.433243
	8.845	0.00137647	0.0127373		8.845	0.216588	0.868796		8.845	0.743651	0.465898
	8.906	0.0218745	0.0140706		8.906	0.201439	0.838925		8.906	0.791827	0.473525
	8.967	4.01176e-15	0.00869804		8.967	0.196541	0.827196		8.967	0.813314	0.467992
	9.028	0.00423529	0.0104745		9.028	0.216886	0.84182		9.028	0.801867	0.435969
	9.089	0.0111843	0.0101529		9.089	0.201016	0.814878		9.089	0.802988	0.437655
	9.15	0.00708628	0.0155765		9.15	0.196537	0.798698		9.15	0.795753	0.437835
	9.211	0.0126039	0.0162353		9.211	0.189733	0.788545		9.211	0.839929	0.462239
	9.272	0.00892941	0.0088549		9.272	0.199835	0.807514		9.272	0.870757	0.459431
	9.333	0.000960784	0.00971765		9.333	0.216824	0.83622		9.333	0.898243	0.455302
	9.394	0.0024	0.0103294		9.394	0.203514	0.829		9.394	0.891353	0.430898
	9.455	0.011251	0.00878039		9.455	0.209075	0.836098		9.455	0.938769	0.461204
	9.516	0.0181765	0.012051		9.516	0.205427	0.826408		9.516	0.962925	0.461459
	9.577	0.00304314	0.0120196		9.577	0.206243	0.816004		9.577	0.972835	0.462651
	9.638	0	0.014502		9.638	0.190812	0.790953		9.638	0.984608	0.477106
	9.699	0	0.0136275		9.699	0.198204	0.791937		9.699	0.989031	0.491953
	9.76	0.00235294	0.0204275		9.76	0.190906	0.783349		9.76	0.980753	0.494482
	9.821	0.000160784	0.0130941		9.821	0.206255	0.801588		9.821	0.984082	0.519914
	9.882	0.00463529	0.0101647		9.882	0.202596	0.799239		9.882	0.983686	0.556369
	9.943	0.0029451	0.00903529		9.943	0.197486	0.785906		9.943	0.982929	0.589478
	10.004	0.0113412	0.0144745		10.004	0.192694	0.761686		10.004	0.977251	0.596553
	10.065	0.00838431	0.0115922		10.065	0.173522	0.718247		10.065	0.987439	0.614753
	10.126	0.000141176	0.0134196		10.126	0.171984	0.699188		10.126	0.977098	0.594737
	10.187	0.00479608	0.0102078		10.187	0.165518	0.679192		10.187	0.980235	0.595596
	10.248	0.00648235	0.0112627		10.248	0.157298	0.665471		10.248	0.976553	0.584686
	10.309	0.00321961	0.0198549		10.309	0.171541	0.690722		10.309	0.983333	0.603125
	10.37	0.0167569	0.0232392		10.37	0.170941	0.714894		10.37	0.977318	0.597259
	10.431	0.0207451	0.0170157		10.431	0.189031	0.757035		10.431	0.978949	0.605667
	10.492	0.00310196	0.014651		10.492	0.197733	0.7958		10.492	0.980404	0.609702
	10.553	0.00686667	0.0185451		10.553	0.215776	0.844208		10.553	0.984678	0.607498
	10.614	0.00786667	0.0115255		10.614	0.222663	0.873812		10.614	0.978427	0.609192
	10.675	0.00183922	0.0140431		10.675	0.225514	0.88718		10.675	0.991459	0.616953
	10.736	0.0127333	0.0176627		10.736	0.216431	0.874063		10.736	0.985663	0.585537
	10.797	0.0161804	0.0182471		10.797	0.225827	0.879561		10.797	0.980776	0.563867
	10.858	0.00395686	0.0134353		10.858	0.218298	0.864784		10.858	0.981173	0.557561
	10.919	0.014698	0.0123882		10.919	0.207843	0.8384		10.919	0.986737	0.554318
	10.98	0.0427255	0.0257059		10.98	0.20649	0.820447		10.98	0.976678	0.529435
	11.041	0.0336667	0.0320706		11.041	0.201561	0.792486		11.041	0.977435	0.53531
	11.102	0.0022	0.0184627		11.102	0.190749	0.75662		11.102	0.942165	0.503737
	11.163	0.00121961	0.0126627		11.163	0.185973	0.724298		11.163	0.958208	0.533808
	11.224	0.0084902	0.0155569		11.224	0.165412	0.675216		11.224	0.921086	0.536502
	11.285	0.0220314	0.0144078		11.285	0.157137	0.642494		11.285	0.873169	0.558259
	11.346	1.56863e-05	0.0132549		11.346	0.141035	0.606086		11.346	0.761631	0.549008
	11.407	0.00646667	0.0212392		11.407	0.144298	0.600439		11.407	0.648082	0.544259
	11.468	0.0174784	0.015502		11.468	0.153161	0.613878		11.468	0.533271	0.532737
	11.529	0	0.015702		11.529	0.160722	0.632922		11.529	0.449753	0.528141
	11.59	0	0.0116902		11.59	0.161078	0.643369		11.59	0.36171	0.481337
	11.651	0.00159216	0.0151882		11.651	0.162667	0.653741		11.651	0.320275	0.459816
	11.712	0.0145216	0.0107882		11.712	0.160275	0.667129		11.712	0.281757	0.444886
	11.773	0.0267529	0.0103647		11.773	0.171204	0.697541		11.773	0.265235	0.450996
	11.834	0.00525882	0.0100941		11.834	0.180333	0.726643		11.834	0.228208	0.418698
	11.895	0.000145098	0.0120392		11.895	0.185729	0.755176		11.895	0.241996	0.420957
	11.956	0.00392157	0.0114196		11.956	0.1962	0.793263		11.956	0.241933	0.391733
	12.017	6.27451e-05	0.0198431		12.017	0.201804	0.824475		12.017	0.311635	0.407322
	12.078	0.00905882	0.0235176		12.078	0.221106	0.864616		12.078	0.388122	0.430569
	12.139	0.026102	0.0212549		12.139	0.210047	0.867129		12.139	0.45169	0.45589
	12.2	0.00843529	0.0205765		12.2	0.223957	0.887451		12.2	0.497102	0.455145
	12.261	0.0178039	0.030149		12.261	0.225369	0.888235		12.261	0.557424	0.465624
	12.322	0.00297647	0.0164353		12.322	0.21982	0.878925		12.322	0.633541	0.510969
	12.383	0.0109059	0.0131804		12.383	0.225333	0.875667		12.383	0.650698	0.50342
	12.444	0.0131333	0.0170431		12.444	0.208741	0.838267		12.444	0.715765	0.515094
	12.505	0.00321569	0.0163451		12.505	0.202373	0.796243		12.505	0.801851	0.526675
	12.566	2.35294e-05	0.0254275		12.566	0.188141	0.740282		12.566	0.862698	0.539098
	12.627	0.00232549	0.0306549		12.627	0.165996	0.675859		12.627	0.853616	0.515906
	12.688	0.0162549	0.0292784		12.688	0.145439	0.608475		12.688	0.863573	0.533102
	12.749	0.0295529	0.0174902		12.749	0.139486	0.561871		12.749	0.90042	0.565106
	12.81	0.0328549	0.0281098		12.81	0.124667	0.514431		12.81	0.919157	0.56531
	12.871	0.0300627	0.022251		12.871	0.109561	0.472949		12.871	0.923925	0.573871
	12.932	0.0458196	0.0214		12.932	0.113984	0.456353		12.932	0.931482	0.593784
	12.993	0.0607647	0.0222627		12.993	0.0960235	0.419196		12.993	0.918831	0.564545
	13.054	0.0437412	0.0228902		13.054	0.0978745	0.407012		13.054	0.938141	0.55798
	13.115	0.0288627	0.0299059		13.115	0.0893647	0.387839		13.115	0.949392	0.562725
	13.176	0.00973333	0.0307059		13.176	0.0993059	0.390655		13.176	0.962757	0.580063
	13.237	0.0118431	0.027098		13.237	0.0908353	0.379475		13.237	0.963882	0.576318
	13.298	0.0100667	0.031451		13.298	0.0935333	0.381592		13.298	0.973949	0.603133
	13.359	0.0324902	0.0298824		13.359	0.102769	0.387027		13.359	0.978318	0.619353
	13.42	0.0736588	0.0240863		13.42	0.0905451	0.363953		13.42	0.971506	0.621886
	13.481	0.0726549	0.0278		13.481	0.0835765	0.337643		13.481	0.970369	0.638514
	13.542	0.100333	0.0275882		13.542	0.0797961	0.311396		13.542	0.951549	0.612682
	13.603	0.101502	0.0273608		13.603	0.0638784	0.269635		13.603	0.958161	0.597063
	13.664	0.0551412	0.0285176		13.664	0.0584039	0.241427		13.664	0.957314	0.582608
	13.725	0.0230196	0.0268314		13.725	0.0566235	0.223816		13.725	0.960404	0.577298
	13.786	0.0192078	0.0228157		13.786	0.050149	0.197604		13.786	0.95211	0.565004
	13.847	0.0408902	0.0263647		13.847	0.0683725	0.190259		13.847	0.931529	0.575769
	13.908	0.0213686	0.0219765		13.908	0.0793294	0.189404		13.908	0.929749	0.609518
	13.969	0.0131059	0.0321725		13.969	0.0604275	0.175616		13.969	0.91609	0.606278
	14.03	0.0176	0.0397412		14.03	0.0498863	0.174075		14.03	0.902584	0.57698
	14.091	0.0170471	0.0325529		14.091	0.0506353	0.180714		14.091	0.912427	0.570533
	14.152	0.0167451	0.0377608		14.152	0.0425843	0.173239		14.152	0.9076	0.564416
	14.213	0.0322431	0.0335333		14.213	0.0377255	0.164376		14.213	0.917996	0.559745
	14.274	0.0113922	0.0371451		14.274	0.0428275	0.161686		14.274	0.921314	0.551788
	14.335	0.0297765	0.0405373		14.335	0.0387216	0.147988		14.335	0.931988	0.548839
	14.396	0.017898	0.0412157		14.396	0.0298157	0.133196		14.396	0.91731	0.528239
	14.457	0.00836863	0.048949		14.457	0.028498	0.12798		14.457	0.91271	0.529761
	14.518	0.0313333	0.0511922		14.518	0.0299137	0.133286		14.518	0.891486	0.514635
	14.579	0.0611059	0.0400706		14.579	0.0333176	0.143482		14.579	0.882659	0.529047
	14.64	0.0627451	0.0544314		14.64	0.0375451	0.153125		14.64	0.86231	0.562655
	14.701	0.0363412	0.0507294		14.701	0.0381843	0.158671		14.701	0.819745	0.590082
	14.762	0.0800667	0.0680706		14.762	0.0392549	0.161776		14.762	0.738741	0.618922
	14.823	0.132518	0.084102		14.823	0.044698	0.166725		14.823	0.675294	0.693792
	14.884	0.152776	0.0849961		14.884	0.0382353	0.160722		14.884	0.592443	0.731016
	14.945	0.15098	0.0743373		14.945	0.0401686	0.166847		14.945	0.501008	0.722933
	15.006	0.184973	0.0918353		15.006	0.0372471	0.167361		15.006	0.473792	0.734408
	15.067	0.229635	0.0980863		15.067	0.044949	0.179278		15.067	0.454376	0.716588
	15.128	0.22698	0.0805608		15.128	0.0453647	0.175918		15.128	0.499957	0.739686
	15.189	0.247169	0.0824235		15.189	0.0648118	0.191941		15.189	0.471855	0.686859
	15.25	0.336584	0.090902		15.25	0.0813647	0.205086		15.25	0.490557	0.676769
	15.311	0.409455	0.101243		15.311	0.102459	0.229816		15.311	0.49329	0.647055
	15.372	0.561184	0.148376		15.372	0.0846118	0.231082		15.372	0.463169	0.601663
	15.433	0.665627	0.146549		15.433	0.0655059	0.237839		15.433	0.42251	0.565329
	15.494	0.685482	0.166843		15.494	0.0586627	0.242624		15.494	0.386714	0.546624
	15.555	0.703059	0.199722		15.555	0.0588941	0.241129		15.555	0.340424	0.520016
	15.616	0.726902	0.227255		15.616	0.0593882	0.236275		15.616	0.306592	0.495514
	15.677	0.721345	0.243251		15.677	0.0527686	0.224824		15.677	0.271549	0.454988
	15.738	0.682	0.282349		15.738	0.0596863	0.233255		15.738	0.252392	0.419408
	15.799	0.636275	0.293714		15.799	0.0552	0.2294		15.799	0.27351	0.408039
	15.86	0.592961	0.307212		15.86	0.0522627	0.233784		15.86	0.286475	0.385008
	15.921	0.542576	0.308945		15.921	0.0713725	0.262416		15.921	0.302706	0.367067
	15.982	0.552557	0.331769		15.982	0.066949	0.266937		15.982	0.374824	0.405027
	16.043	0.533075	0.350271		16.043	0.0678588	0.273055		16.043	0.374624	0.379267
	16.104	0.531004	0.369655		16.104	0.0691137	0.275718		16.104	0.414431	0.408459
	16.165	0.554796	0.376596		16.165	0.0667725	0.268922		16.165	0.413839	0.424122
	16.226	0.606561	0.36511		16.226	0.0597176	0.249635		16.226	0.373071	0.430047
	16.287	0.701349	0.365937		16.287	0.0612784	0.238278		16.287	0.309459	0.419522
	16.348	0.759231	0.364196		16.348	0.0446118	0.202506		16.348	0.265965	0.42611
	16.409	0.810718	0.352518		16.409	0.0408627	0.186871		16.409	0.255051	0.454753
	16.47	0.838318	0.371376		16.47	0.039051	0.180894		16.47	0.216792	0.431533
	16.531	0.889184	0.392004		16.531	0.0474118	0.188624		16.531	0.185757	0.383063
	16.592	0.981435	0.381961		16.592	0.0423373	0.183376		16.592	0.145682	0.299965
	16.653	0.969569	0.369706		16.653	0.0413333	0.185475		16.653	0.142416	0.246302
	16.714	0.97642	0.366141		16.714	0.0485255	0.201706		16.714	0.142031	0.205196
	16.775	0.99309	0.375008		16.775	0.0578863	0.219302		16.775	0.139075	0.18622
	16.836	0.999294	0.381886		16.836	0.0512	0.214039		16.836	0.102259	0.153788
	16.897	0.994741	0.386996		16.897	0.0549059	0.215224		16.897	0.0871255	0.145204
	16.958	0.974231	0.379498		16.958	0.0503176	0.207522		16.958	0.0678588	0.129357
	17.019	0.974192	0.379761		17.019	0.0460706	0.202451		17.019	0.047098	0.108416
	17.08	0.996318	0.410941		17.08	0.0484784	0.203949		17.08	0.032502	0.084
	17.141	0.995122	0.413071		17.141	0.0558941	0.210914		17.141	0.0376745	0.0804667
	17.202	0.997341	0.414388		17.202	0.0513686	0.206882		17.202	0.0372667	0.0767804
	17.263	0.999451	0.427322		17.263	0.0488431	0.2026		17.263	0.0306471	0.0731412
	17.324	0.996424	0.412157		17.324	0.0465098	0.194753		17.324	0.0234157	0.0664471
	17.385	0.999071	0.413443		17.385	0.0455725	0.18702		17.385	0.024698	0.0705725
	17.446	0.993133	0.392792		17.446	0.0416275	0.178816		17.446	0.0238745	0.0739922
	17.507	0.955882	0.379325		17.507	0.0411843	0.176992		17.507	0.0188078	0.0693961
	17.568	0.926992	0.365231		17.568	0.0447529	0.181216		17.568	0.0198667	0.069149
	17.629	0.79222	0.361518		17.629	0.0409451	0.179541		17.629	0.018898	0.0612275
	17.69	0.730243	0.352431		17.69	0.0407137	0.176961		17.69	0.0158824	0.0523216
	17.751	0.671306	0.361808		17.751	0.0386039	0.170882		17.751	0.0127647	0.0488627
	17.812	0.793094	0.387604		17.812	0.0373804	0.168498		17.812	0.0150235	0.0552392
	17.873	0.82258	0.390392		17.873	0.0405098	0.172047		17.873	0.013349	0.0601373
	17.934	0.784314	0.383275		17.934	0.0386235	0.17082		17.934	0.0134431	0.0586314
	17.995	0.696929	0.366694		17.995	0.042549	0.174549		17.995	0.0172157	0.0581137
	18.056	0.709169	0.362263		18.056	0.0463765	0.177067		18.056	0.0143451	0.0398471
	18.117	0.651859	0.351455		18.117	0.0392157	0.168384		18.117	0.0222549	0.0502353
	18.178	0.67	0.337204		18.178	0.0455922	0.171694		18.178	0.0149529	0.0474275
	18.239	0.699608	0.336408		18.239	0.0426824	0.166953		18.239	0.0117412	0.0456275
	18.3	0.670208	0.344451		18.3	0.0372235	0.161353		18.3	0.0152118	0.0493333
	18.361	0.702882	0.364831		18.361	0.0385608	0.164973		18.361	0.0142078	0.0502588
	18.422	0.775408	0.354396		18.422	0.0353333	0.166678		18.422	0.0125216	0.048251
	18.483	0.839561	0.343192		18.483	0.0435529	0.183306		18.483	0.0159608	0.055349
	18.544	0.893553	0.352314		18.544	0.0469451	0.188435		18.544	0.0165569	0.0623451
	18.605	0.85651	0.341698		18.605	0.0438078	0.186098		18.605	0.0190157	0.069651
	18.666	0.851906	0.347455		18.666	0.0444784	0.188031		18.666	0.0202941	0.0699725
	18.727	0.71471	0.362671		18.727	0.0447059	0.18942		18.727	0.0194196	0.0675137
	18.788	0.712286	0.400078		18.788	0.0525725	0.197729		18.788	0.0165765	0.0608039
	18.849	0.698263	0.406686		18.849	0.0462078	0.188655		18.849	0.0181098	0.0593804
	18.91	0.644376	0.365306		18.91	0.0422235	0.182447		18.91	0.0180431	0.0613843
	18.971	0.568294	0.361408		18.971	0.0410784	0.180322		18.971	0.0158431	0.0630863
	19.032	0.562208	0.362463		19.032	0.0474667	0.187055		19.032	0.0239176	0.0745451
	19.093	0.569706	0.331929		19.093	0.0476	0.18802		19.093	0.0261647	0.0766314
	19.154	0.552702	0.321298		19.154	0.0512157	0.192737		19.154	0.0238275	0.0634235
	19.215	0.571949	0.318263		19.215	0.050949	0.192424		19.215	0.0229216	0.0528314
	19.276	0.62482	0.317059		19.276	0.0422549	0.183706		19.276	0.0398157	0.0510275
	19.337	0.600812	0.31922		19.337	0.0467176	0.187812		19.337	0.0633725	0.0664902
	19.398	0.613004	0.343608		19.398	0.0478275	0.189494		19.398	0.0680471	0.0633843
	19.459	0.64882	0.346796		19.459	0.0447059	0.184039		19.459	0.0775647	0.066949
	19.52	0.671804	0.354431		19.52	0.0423255	0.179239		19.52	0.0771059	0.0675098
	19.581	0.653157	0.384682		19.581	0.0402039	0.175486		19.581	0.0789686	0.0720667
	19.642	0.65318	0.407122		19.642	0.0401725	0.172624		19.642	0.0920549	0.0789529
	19.703	0.643992	0.38942		19.703	0.0431529	0.17222		19.703	0.109153	0.0868706
	19.764	0.576792	0.379118		19.764	0.0374667	0.167071		19.764	0.125267	0.100827
	19.825	0.602725	0.354871		19.825	0.0355647	0.17098		19.825	0.138016	0.118333
	19.886	0.678106	0.351267		19.886	0.0471451	0.192286		19.886	0.13729	0.115443
	19.947	0.767847	0.336475		19.947	0.0450157	0.204702		19.947	0.140106	0.117286
	20.008	0.841125	0.333694		20.008	0.0566941	0.236573		20.008	0.151718	0.129671
	20.069	0.873369	0.319596		20.069	0.0666157	0.266247		20.069	0.142314	0.118271
	20.13	0.946376	0.32618		20.13	0.0684314	0.290157		20.13	0.15051	0.119275
	20.191	0.998345	0.312608						20.191	0.126196	0.104682
	20.252	0.986792	0.315565						20.252	0.098149	0.110086
	20.313	0.967255	0.304486						20.313	0.0740745	0.112482
	20.374	0.985565	0.332541						20.374	0.0792392	0.129467
	20.435	0.984008	0.347373						20.435	0.0868157	0.138702
	20.496	0.993278	0.342694						20.496	0.0985373	0.143224
	20.557	0.967518	0.327882						20.557	0.126302	0.149847
	20.618	0.9996	0.315533						20.618	0.163384	0.169553
	20.679	0.995525	0.325286						20.679	0.173169	0.184184
	20.74	0.985106	0.346322						20.74	0.181949	0.212557
	20.801	0.990384	0.341757						20.801	0.181086	0.235808
	20.862	0.993976	0.353529						20.862	0.178106	0.255522
	20.923	0.945098	0.352498						20.923	0.162435	0.259973
	20.984	0.945769	0.383482						20.984	0.158165	0.26898
	21.045	0.793757	0.392255						21.045	0.14642	0.268173
	21.106	0.762733	0.403259						21.106	0.166627	0.287098
	21.167	0.666757	0.400404						21.167	0.210604	0.31949
	21.228	0.725482	0.403329						21.228	0.260318	0.362502
	21.289	0.627102	0.398427						21.289	0.284141	0.378584
	21.35	0.630133	0.410651						21.35	0.307604	0.393588
	21.411	0.661631	0.38822						21.411	0.320353	0.407271
	21.472	0.652416	0.397988						21.472	0.324125	0.410122
	21.533	0.723851	0.398412						21.533	0.34689	0.413161
	21.594	0.678961	0.380537						21.594	0.391612	0.415243
	21.655	0.691392	0.356424						21.655	0.459898	0.400863
	21.716	0.600439	0.327855						21.716	0.589459	0.421914
	21.777	0.563565	0.294898						21.777	0.679075	0.42731
	21.838	0.603106	0.301051						21.838	0.742067	0.422525
	21.899	0.593569	0.301647						21.899	0.801114	0.434325
	21.96	0.540557	0.335267						21.96	0.838008	0.425773
	22.021	0.44631	0.343459						22.021	0.863216	0.406773
	22.082	0.403318	0.332976						22.082	0.899275	0.4142
	22.143	0.358929	0.356631						22.143	0.870761	0.405
	22.204	0.32989	0.361918						22.204	0.818463	0.401702
	22.265	0.355212	0.36009						22.265	0.756812	0.38329
	22.326	0.38698	0.339667						22.326	0.731918	0.362745
	22.387	0.361722	0.365929						22.387	0.753275	0.351243
	22.448	0.384682	0.36162						22.448	0.793694	0.358357
	22.509	0.404816	0.356663						22.509	0.791008	0.33602
	22.57	0.416302	0.357302
	22.631	0.438196	0.350596
	22.692	0.431957	0.356494
	22.753	0.447286	0.38289
	22.814	0.438529	0.357196
	22.875	0.419592	0.353827
	22.936	0.400773	0.337973
	22.997	0.441051	0.333016
	23.058	0.516847	0.340878
	23.119	0.533278	0.300455
	23.18	0.542757	0.300671
	23.241	0.621486	0.298337
	23.302	0.645227	0.287086
	23.363	0.670984	0.303486
	23.424	0.673529	0.315925
	23.485	0.590937	0.314039
	23.546	0.661047	0.345827
	23.607	0.655992	0.342506
	23.668	0.656341	0.328612
	23.729	0.660043	0.321945
	23.79	0.665839	0.314498
	23.851	0.582773	0.306133
	23.912	0.588235	0.298008

## Sheet: Figure 7—figure supplement 2B
2024-10-18
Normalized intensity
	PBS				mIL-1β				Y-27632 + mIL-1β
	Length	N	F-actin		Length	N	F-actin		Length	N	F-actin
	0	0.784314	0.259282		0	0.998039	0.409804		0	1	0.15416
	0.061	0.963953	0.281988		0.061	0.999639	0.365827		0.061	0.991945	0.161362
	0.122	0.960408	0.283115		0.122	0.99889	0.30289		0.122	0.999357	0.159922
	0.183	0.990573	0.299902		0.183	0.991298	0.229918		0.183	0.992706	0.14717
	0.244	1	0.30322		0.244	0.952612	0.144063		0.244	0.993992	0.145875
	0.305	0.992518	0.314982		0.305	0.926341	0.114671		0.305	0.987184	0.138827
	0.366	0.964545	0.309255		0.366	0.965349	0.186318		0.366	0.976216	0.135727
	0.427	0.982867	0.303028		0.427	0.997525	0.240584		0.427	0.997137	0.147281
	0.488	0.979506	0.318349		0.488	0.981408	0.184482		0.488	0.990847	0.146993
	0.549	0.997831	0.322982		0.549	1	0.207149		0.549	0.991784	0.143209
	0.61	0.97622	0.317447		0.61	0.999918	0.189031		0.61	0.996584	0.147764
	0.671	0.997784	0.350282		0.671	0.996969	0.172239		0.671	0.996851	0.139676
	0.732	0.997761	0.329104		0.732	0.998071	0.190365		0.732	1	0.150849
	0.793	0.989576	0.361402		0.793	0.988522	0.182588		0.793	0.999322	0.159417
	0.854	0.985502	0.359722		0.854	0.984816	0.23051		0.854	0.990894	0.167494
	0.915	0.959369	0.352693		0.915	0.989604	0.253071		0.915	0.982616	0.19038
	0.976	0.914565	0.347785		0.976	0.996506	0.282427		0.976	0.989698	0.209055
	1.037	0.869467	0.365513		1.037	1	0.281886		1.037	0.986816	0.224502
	1.098	0.839655	0.356215		1.098	1	0.263176		1.098	0.996455	0.245635
	1.159	0.940965	0.338167		1.159	0.9884	0.209569		1.159	0.997235	0.255753
	1.22	0.925039	0.324676		1.22	0.993361	0.205816		1.22	0.986478	0.269143
	1.281	0.949263	0.343801		1.281	0.980847	0.199863		1.281	0.979608	0.266974
	1.342	0.965051	0.345856		1.342	0.971506	0.175918		1.342	0.996106	0.243672
	1.403	0.966749	0.330252		1.403	0.994408	0.214639		1.403	1	0.222158
	1.464	0.988204	0.34616		1.464	0.998486	0.263137		1.464	0.998761	0.191362
	1.525	0.988408	0.326056		1.525	1	0.298282		1.525	0.982706	0.146389
	1.586	0.981608	0.326894		1.586	0.99389	0.294122		1.586	0.983427	0.133467
	1.647	0.974165	0.339984		1.647	0.978231	0.271447		1.647	0.999722	0.128154
	1.708	0.988541	0.348622		1.708	0.995659	0.27291		1.708	1	0.126993
	1.769	1	0.359891		1.769	0.976024	0.226675		1.769	0.989765	0.12328
	1.83	0.976365	0.330762		1.83	0.975294	0.203788		1.83	0.970333	0.130845
	1.891	0.989059	0.31759		1.891	0.999475	0.203475		1.891	0.999576	0.149344
	1.952	0.896945	0.31769		1.952	0.994561	0.176082		1.952	0.985004	0.160304
	2.013	0.765447	0.312192		2.013	0.938686	0.162953		2.013	0.989478	0.155
	2.074	0.721878	0.325133		2.074	0.784549	0.126357		2.074	0.989325	0.149312
	2.135	0.720357	0.339061		2.135	0.639792	0.142318		2.135	0.979604	0.141178
	2.196	0.606643	0.34524		2.196	0.582592	0.173357		2.196	0.978675	0.1437
	2.257	0.550953	0.346216		2.257	0.575416	0.183875		2.257	0.998337	0.142586
	2.318	0.531769	0.354627		2.318	0.687894	0.288098		2.318	0.986251	0.139185
	2.379	0.485318	0.367791		2.379	0.643525	0.222027		2.379	0.99671	0.140269
	2.44	0.489729	0.37373		2.44	0.650286	0.217984		2.44	0.996098	0.120981
	2.501	0.459612	0.353604		2.501	0.684133	0.268063		2.501	0.988408	0.132445
	2.562	0.527769	0.3606		2.562	0.683035	0.28778		2.562	1	0.131226
	2.623	0.559243	0.398252		2.623	0.672961	0.279769		2.623	1	0.135181
	2.684	0.615157	0.391454		2.684	0.661604	0.255655		2.684	0.983502	0.131573
	2.745	0.657059	0.40183		2.745	0.623286	0.183482		2.745	0.96918	0.116904
	2.806	0.582298	0.347208		2.806	0.659137	0.171502		2.806	1	0.129442
	2.867	0.5802	0.338		2.867	0.716067	0.171902		2.867	0.998329	0.118644
	2.928	0.591553	0.356541		2.928	0.789718	0.194918		2.928	0.998125	0.12051
	2.989	0.606094	0.345457		2.989	0.846647	0.223384		2.989	0.997518	0.107677
	3.05	0.638039	0.344587		3.05	0.911204	0.265275		3.05	0.999588	0.122409
	3.111	0.654341	0.336218		3.111	0.932404	0.253149		3.111	0.979082	0.1237
	3.172	0.669808	0.341101		3.172	0.980157	0.26962		3.172	0.99609	0.128536
	3.233	0.666055	0.344585		3.233	0.964365	0.271106		3.233	0.996216	0.132892
	3.294	0.647247	0.381823		3.294	0.993408	0.326459		3.294	0.995557	0.138393
	3.355	0.528757	0.363148		3.355	0.989784	0.341878		3.355	0.979761	0.126664
	3.416	0.619059	0.373631		3.416	0.998765	0.401161		3.416	0.98509	0.142315
	3.477	0.615392	0.377757		3.477	0.96602	0.395341		3.477	0.976447	0.152149
	3.538	0.705016	0.384771		3.538	0.995502	0.517694		3.538	0.985275	0.16398
	3.599	0.743447	0.383149		3.599	1	0.542855		3.599	0.98798	0.164628
	3.66	0.74562	0.372352		3.66	0.979314	0.504941		3.66	0.979902	0.162154
	3.721	0.66558	0.323499		3.721	0.967992	0.483839		3.721	0.975035	0.155015
	3.782	0.626886	0.317977		3.782	0.980514	0.518157		3.782	0.971157	0.170486
	3.843	0.647439	0.314993		3.843	0.985078	0.480004		3.843	0.988157	0.163006
	3.904	0.578949	0.324327		3.904	0.958114	0.417498		3.904	0.956494	0.178557
	3.965	0.458133	0.318776		3.965	0.967486	0.421043		3.965	0.934729	0.179719
	4.026	0.482361	0.303933		4.026	0.975608	0.427137		4.026	0.991569	0.195542
	4.087	0.660051	0.316487		4.087	0.978953	0.452965		4.087	0.983043	0.182203
	4.148	0.682788	0.281657		4.148	0.988086	0.511678		4.148	0.982725	0.18449
	4.209	0.768463	0.301404		4.209	0.998914	0.570698		4.209	0.964192	0.187135
	4.27	0.801816	0.316181		4.27	1	0.564286		4.27	0.824161	0.168846
	4.331	0.759824	0.251748		4.331	0.980722	0.517894		4.331	0.774314	0.164223
	4.392	0.716773	0.24971		4.392	0.951212	0.437667		4.392	0.761851	0.193376
	4.453	0.715827	0.269716		4.453	0.997196	0.449973		4.453	0.627824	0.184446
	4.514	0.772875	0.298067		4.514	0.993447	0.423616		4.514	0.600553	0.198083
	4.575	0.745251	0.301803		4.575	0.987298	0.405318		4.575	0.574404	0.195196
	4.636	0.721608	0.299577		4.636	0.999918	0.425478		4.636	0.4728	0.192927
	4.697	0.708141	0.318986		4.697	0.990094	0.370745		4.697	0.398278	0.205252
	4.758	0.577792	0.318573		4.758	0.998886	0.372996		4.758	0.2992	0.197598
	4.819	0.57069	0.327456		4.819	0.992557	0.36502		4.819	0.259929	0.182767
	4.88	0.612161	0.333301		4.88	0.98882	0.408537		4.88	0.152659	0.128005
	4.941	0.608408	0.321006		4.941	0.98909	0.470396		4.941	0.206459	0.141307
	5.002	0.643706	0.323448		5.002	0.995537	0.544588		5.002	0.252514	0.179972
	5.063	0.660627	0.339411		5.063	0.998259	0.530012		5.063	0.295929	0.163882
	5.124	0.681157	0.349991		5.124	0.981647	0.464824		5.124	0.304714	0.152518
	5.185	0.668533	0.374646		5.185	0.959204	0.386969		5.185	0.259459	0.156991
	5.246	0.559769	0.351069		5.246	0.909184	0.300075		5.246	0.206698	0.15763
	5.307	0.574808	0.355799		5.307	0.837451	0.208227		5.307	0.224271	0.145338
	5.368	0.523024	0.36072		5.368	0.778086	0.170953		5.368	0.259808	0.163964
	5.429	0.523447	0.335831		5.429	0.700824	0.172255		5.429	0.387067	0.177908
	5.49	0.613176	0.32564		5.49	0.559996	0.142318		5.49	0.428898	0.179882
	5.551	0.745086	0.331042		5.551	0.430498	0.172278		5.551	0.39971	0.162307
	5.612	0.859384	0.351827		5.612	0.245322	0.165659		5.612	0.312929	0.143296
	5.673	0.882549	0.345113		5.673	0.179259	0.239063		5.673	0.214796	0.111659
	5.734	0.814722	0.346655		5.734	0.143047	0.299212		5.734	0.12929	0.0832624
	5.795	0.677341	0.322815		5.795	0.0446471	0.269992		5.795	0.0999804	0.0927275
	5.856	0.596533	0.328193		5.856	0.0798824	0.334157		5.856	0.0950706	0.0729267
	5.917	0.602329	0.314053		5.917	0.0709569	0.356992		5.917	0.033451	0.0650675
	5.978	0.612502	0.33895		5.978	0.101439	0.42982		5.978	0.056149	0.0625576
	6.039	0.631031	0.32601		6.039	0.12062	0.469408		6.039	0.0606549	0.0515812
	6.1	0.652722	0.350704		6.1	0.146529	0.495196		6.1	0.0256	0.0539153
	6.161	0.58702	0.368933		6.161	0.120553	0.471992		6.161	0.0309725	0.0504514
	6.222	0.517647	0.374947		6.222	0.0982039	0.463773		6.222	0.0346392	0.0438298
	6.283	0.585337	0.401177		6.283	0.143776	0.546596		6.283	0.0416941	0.0376192
	6.344	0.52409	0.410419		6.344	0.143714	0.59602		6.344	0.0557333	0.0462224
	6.405	0.569063	0.440833		6.405	0.171494	0.669733		6.405	0.0176667	0.0312753
	6.466	0.47198	0.439895		6.466	0.183906	0.736443		6.466	0.019051	0.0404596
	6.527	0.4578	0.443418		6.527	0.233004	0.831494		6.527	0.0183882	0.0295541
	6.588	0.482839	0.460227		6.588	0.23129	0.846796		6.588	0.000596078	0.0333808
	6.649	0.480078	0.442033		6.649	0.18838	0.81658		6.649	0.0155137	0.0435612
	6.71	0.557086	0.430406		6.71	0.195973	0.845882		6.71	0.0178353	0.0314533
	6.771	0.675427	0.435266		6.771	0.212165	0.874298		6.771	0.0211412	0.0372969
	6.832	0.706749	0.436201		6.832	0.22482	0.880416		6.832	0.0145725	0.0358157
	6.893	0.688745	0.418047		6.893	0.191525	0.831141		6.893	0.0311216	0.0390573
	6.954	0.556376	0.415347		6.954	0.201369	0.834486		6.954	0.00872941	0.0357024
	7.015	0.616694	0.423866		7.015	0.233851	0.86238		7.015	0.00268235	0.0371122
	7.076	0.595843	0.413814		7.076	0.181125	0.803541		7.076	0.00192549	0.0258141
	7.137	0.589678	0.37609		7.137	0.202698	0.824369		7.137	0.00222745	0.0281
	7.198	0.717231	0.376119		7.198	0.2034	0.817796		7.198	0.0012902	0.0363929
	7.259	0.8366	0.36546		7.259	0.144588	0.726533		7.259	0.00195294	0.0330345
	7.32	0.81729	0.329526		7.32	0.1796	0.749027		7.32	0.0165333	0.0443914
	7.381	0.850024	0.326802		7.381	0.195169	0.795616		7.381	0.0116118	0.029691
	7.442	0.905514	0.351213		7.442	0.26111	0.869443		7.442	0.00444314	0.0278275
	7.503	0.739137	0.342017		7.503	0.193063	0.782067		7.503	0.0102392	0.029522
	7.564	0.751463	0.344475		7.564	0.18549	0.763094		7.564	0.0162431	0.0288569
	7.625	0.655322	0.342585		7.625	0.195808	0.771424		7.625	0.0296902	0.0324624
	7.686	0.640412	0.365662		7.686	0.222678	0.805325		7.686	0.00513726	0.0329196
	7.747	0.632439	0.373621		7.747	0.207282	0.808871		7.747	0.0233216	0.0363329
	7.808	0.622408	0.366201		7.808	0.217455	0.828165		7.808	0.00728235	0.0400722
	7.869	0.675063	0.340653		7.869	0.1868	0.788682		7.869	0.00444314	0.0327392
	7.93	0.683278	0.321871		7.93	0.178114	0.76991		7.93	0.00745882	0.0446757
	7.991	0.766616	0.339318		7.991	0.173302	0.770549		7.991	0.0246471	0.046391
	8.052	0.771302	0.344981		8.052	0.144388	0.749016		8.052	0.00932549	0.0375557
	8.113	0.807808	0.345753		8.113	0.153071	0.758643		8.113	0.0157647	0.0426753
	8.174	0.852886	0.341331		8.174	0.197067	0.800494		8.174	0.0203804	0.0486604
	8.235	0.799776	0.320918		8.235	0.210557	0.797588		8.235	0.0125686	0.0509608
	8.296	0.688455	0.3415		8.296	0.204086	0.762694		8.296	0.0342667	0.0595525
	8.357	0.659545	0.32094		8.357	0.146145	0.669153		8.357	0.0164667	0.0606239
	8.418	0.680286	0.314129		8.418	0.192369	0.67109		8.418	0.0266549	0.0791196
	8.479	0.707969	0.330438		8.479	0.153467	0.598816		8.479	0.0807373	0.105033
	8.54	0.829298	0.327988		8.54	0.140624	0.579569		8.54	0.160318	0.132272
	8.601	0.771494	0.34138		8.601	0.133522	0.561827		8.601	0.135294	0.148157
	8.662	0.86689	0.345158		8.662	0.127831	0.544671		8.662	0.121655	0.168033
	8.723	0.854918	0.333262		8.723	0.128071	0.521471		8.723	0.100678	0.152175
	8.784	0.965616	0.376147		8.784	0.103996	0.482898		8.784	0.132576	0.162271
	8.845	0.960212	0.372181		8.845	0.120541	0.497196		8.845	0.196024	0.165198
	8.906	0.935592	0.370284		8.906	0.12282	0.490655		8.906	0.244698	0.164819
	8.967	0.981843	0.379423		8.967	0.0902863	0.440969		8.967	0.278306	0.149192
	9.028	0.988251	0.383884		9.028	0.115216	0.465255		9.028	0.238322	0.124893
	9.089	0.998031	0.381679		9.089	0.0911333	0.434553		9.089	0.221761	0.132721
	9.15	0.985031	0.376065		9.15	0.0907843	0.425204		9.15	0.130188	0.10651
	9.211	0.988616	0.359457		9.211	0.102757	0.422518		9.211	0.137941	0.125367
	9.272	0.983145	0.356662		9.272	0.075098	0.369725		9.272	0.140239	0.116397
	9.333	0.964706	0.358315		9.333	0.0526784	0.315463		9.333	0.0944941	0.103518
	9.394	0.9818	0.367584		9.394	0.0569176	0.301169		9.394	0.215761	0.125543
	9.455	0.985698	0.367925		9.455	0.0568118	0.290996		9.455	0.131514	0.112075
	9.516	0.995627	0.389982		9.516	0.0685922	0.301424		9.516	0.110541	0.122635
	9.577	0.981612	0.380047		9.577	0.0771922	0.316871		9.577	0.0628824	0.130431
	9.638	0.994651	0.384276		9.638	0.0934902	0.352976		9.638	0.0469882	0.141143
	9.699	0.988071	0.373196		9.699	0.114565	0.410518		9.699	0.0153843	0.132443
	9.76	0.988788	0.37454		9.76	0.0766627	0.387149		9.76	0.0370706	0.133173
	9.821	0.983255	0.353844		9.821	0.0797451	0.391251		9.821	0.0575804	0.126332
	9.882	0.990059	0.355605		9.882	0.128863	0.433067		9.882	0.0647373	0.106984
	9.943	0.942918	0.356713		9.943	0.0617373	0.347714		9.943	0.0943255	0.101642
	10.004	0.876686	0.360854		10.004	0.078298	0.352725		10.004	0.0966118	0.099051
	10.065	0.831235	0.362121		10.065	0.0688824	0.324596		10.065	0.074749	0.088529
	10.126	0.785098	0.365967		10.126	0.101839	0.35698		10.126	0.101067	0.106664
	10.187	0.729796	0.403811		10.187	0.0932824	0.356039		10.187	0.110604	0.109902
	10.248	0.634141	0.418238		10.248	0.108533	0.367114		10.248	0.115973	0.105029
	10.309	0.551039	0.438146		10.309	0.0751922	0.311678		10.309	0.0939725	0.10988
	10.37	0.522565	0.459734		10.37	0.0411373	0.267267		10.37	0.128953	0.117971
	10.431	0.534769	0.479624		10.431	0.0508706	0.286784		10.431	0.128227	0.114992
	10.492	0.575353	0.485645		10.492	0.0903725	0.328271		10.492	0.181443	0.120513
	10.553	0.574616	0.507365		10.553	0.0839686	0.319392		10.553	0.205075	0.137982
	10.614	0.52982	0.512728		10.614	0.0588353	0.290835		10.614	0.263725	0.133296
	10.675	0.535949	0.508778		10.675	0.0695961	0.292906		10.675	0.282298	0.13882
	10.736	0.478561	0.494959		10.736	0.052102	0.278745		10.736	0.287435	0.149439
	10.797	0.462149	0.516379		10.797	0.0759373	0.317184		10.797	0.307992	0.132836
	10.858	0.425957	0.485402		10.858	0.0891059	0.334208		10.858	0.241184	0.144627
	10.919	0.469039	0.460074		10.919	0.063902	0.307812		10.919	0.210427	0.151907
	10.98	0.476369	0.425565		10.98	0.0668784	0.309631		10.98	0.250961	0.154721
	11.041	0.51191	0.429124		11.041	0.0964157	0.334878		11.041	0.325039	0.158702
	11.102	0.500635	0.447714		11.102	0.0797843	0.310996		11.102	0.326937	0.147419
	11.163	0.50078	0.436775		11.163	0.116835	0.340365		11.163	0.313502	0.138663
	11.224	0.487341	0.415511		11.224	0.0860627	0.309196		11.224	0.324525	0.107852
	11.285	0.545133	0.401242		11.285	0.0752667	0.30189		11.285	0.413533	0.0847059
	11.346	0.558188	0.42241		11.346	0.146329	0.385522		11.346	0.521843	0.107308
	11.407	0.538498	0.406028		11.407	0.0352235	0.282639		11.407	0.736063	0.115935
	11.468	0.541075	0.403809		11.468	0.104863	0.348424		11.468	0.91902	0.1414
	11.529	0.529412	0.423271		11.529	0.0408471	0.274153		11.529	0.948663	0.145331
	11.59	0.521082	0.414992		11.59	0.084149	0.309098		11.59	0.988792	0.139903
	11.651	0.492882	0.4343		11.651	0.0368863	0.252153		11.651	0.99002	0.144632
	11.712	0.488216	0.432		11.712	0.0755098	0.296592		11.712	0.992451	0.189562
	11.773	0.448898	0.413704		11.773	0.0659961	0.285137		11.773	0.978804	0.213885
	11.834	0.514145	0.461199		11.834	0.0470824	0.253592		11.834	0.997969	0.212152
	11.895	0.527314	0.457027		11.895	0.0695176	0.265686		11.895	0.988725	0.20525
	11.956	0.495141	0.456473		11.956	0.0891686	0.282424		11.956	0.99978	0.220919
	12.017	0.442945	0.452629		12.017	0.0559412	0.245263		12.017	0.997255	0.235983
	12.078	0.510702	0.447515		12.078	0.0367373	0.226439		12.078	0.996239	0.219287
	12.139	0.456663	0.438909		12.139	0.0548314	0.244031		12.139	0.990071	0.208965
	12.2	0.411859	0.433737		12.2	0.0758039	0.245973		12.2	0.994961	0.203059
	12.261	0.416176	0.422035		12.261	0.0569608	0.206455		12.261	0.946788	0.192924
	12.322	0.409553	0.396035		12.322	0.0455961	0.178776		12.322	0.933678	0.160214
	12.383	0.43091	0.385447		12.383	0.0363804	0.161251		12.383	0.890686	0.154955
	12.444	0.441455	0.371718		12.444	0.0335725	0.148384		12.444	0.801678	0.167241
	12.505	0.415392	0.358604		12.505	0.0444549	0.15758		12.505	0.781047	0.169409
	12.566	0.452498	0.381134		12.566	0.0436745	0.140624		12.566	0.767314	0.171407
	12.627	0.484996	0.380107		12.627	0.0273333	0.102047		12.627	0.776239	0.172633
	12.688	0.418384	0.370966		12.688	0.0241529	0.074149		12.688	0.962537	0.194477
	12.749	0.416529	0.38058		12.749	0.0117412	0.0558706		12.749	0.982808	0.190884
	12.81	0.370173	0.37758		12.81	0.00452941	0.0318039		12.81	0.983761	0.174366
	12.871	0.317533	0.369611		12.871	0.000376471	0.00636471		12.871	0.991596	0.164708
	12.932	0.335796	0.374409		12.932	0.0220275	0.0309647		12.932	0.991678	0.171091
	12.993	0.34842	0.348248		12.993	0.00942353	0.0173333		12.993	0.983992	0.153509
	13.054	0.311792	0.354034		13.054	0.000498039	0.0024549		13.054	0.988678	0.149405
	13.115	0.252988	0.326054		13.115	0.00125882	0.00389804		13.115	1	0.139623
	13.176	0.229529	0.31842		13.176	0.000262745	0.00418431		13.176	1	0.14469
	13.237	0.33429	0.334978		13.237	0.00441176	0.00651765		13.237	0.978855	0.14586
	13.298	0.391173	0.314655		13.298	0.00422353	0.00533333		13.298	0.984447	0.141095
	13.359	0.373075	0.293517		13.359	0.002	0.00114118		13.359	0.99149	0.130901
	13.42	0.464063	0.308509		13.42	2.35294e-05	2.35294e-05		13.42	0.976137	0.137737
	13.481	0.445502	0.312633		13.481	0.0043451	0.00542353		13.481	0.971078	0.148736
	13.542	0.412275	0.312806		13.542	0.00661569	0.00815294		13.542	0.896561	0.149793
	13.603	0.478812	0.307256		13.603	0	0.00157647		13.603	0.884816	0.127322
	13.664	0.507196	0.305182		13.664	0.000207843	0.00251373		13.664	0.912898	0.139283
	13.725	0.469918	0.294712		13.725	0.00154118	0.00408235		13.725	0.912992	0.172923
	13.786	0.521996	0.302409		13.786	0	0.0107529		13.786	0.925031	0.177914
	13.847	0.47931	0.316423		13.847	0.00121569	0.0161569		13.847	0.920122	0.191086
	13.908	0.55362	0.313678		13.908	0.00437255	0.0156784		13.908	0.903949	0.194408
	13.969	0.533075	0.327285		13.969	3.92157e-05	0.00241177		13.969	0.920816	0.162893
	14.03	0.526439	0.365049		14.03	3.92157e-05	7.45098e-05		14.03	0.826984	0.185907
	14.091	0.51671	0.397635		14.091	0.00276078	0.00276078		14.091	0.626914	0.203804
	14.152	0.471682	0.423345		14.152	0.00428627	0.00222745		14.152	0.733357	0.233802
	14.213	0.578302	0.45537		14.213	0.00103529	0.000517647		14.213	0.614408	0.216256
	14.274	0.511812	0.422911		14.274	0	0.000572549		14.274	0.399369	0.205639
	14.335	0.544753	0.428838		14.335	0	0.00045098		14.335	0.274094	0.198265
	14.396	0.663741	0.452247		14.396	0.000623529	0		14.396	0.219204	0.225043
	14.457	0.661557	0.452988		14.457	9.80392e-05	9.80392e-05		14.457	0.229639	0.212756
	14.518	0.674075	0.432504		14.518	0	0		14.518	0.175722	0.235713
	14.579	0.668349	0.420055		14.579	0.00302745	0.00151373		14.579	0.20769	0.250842
	14.64	0.661318	0.431869		14.64	0.00356471	0.00178431		14.64	0.159898	0.267915
	14.701	0.573357	0.421752		14.701	0.00595294	0.00107451		14.701	0.155984	0.251962
	14.762	0.425259	0.394352		14.762	0.00828235	0.00366274		14.762	0.197922	0.249158
	14.823	0.420961	0.401923		14.823	0.00819608	0.00647843		14.823	0.298196	0.257487
	14.884	0.425169	0.412913		14.884	0.00155294	0		14.884	0.338067	0.250383
	14.945	0.354835	0.409198		14.945	0.00148628	0		14.945	0.323855	0.265857
	15.006	0.303663	0.398995		15.006	0	0		15.006	0.341859	0.259178
	15.067	0.410396	0.415126		15.067	0.00107451	0.00181569		15.067	0.390784	0.27033
	15.128	0.50118	0.383979		15.128	0.00557255	0.00654902		15.128	0.509839	0.277409
	15.189	0.528357	0.392767		15.189	0.00112549	0.000823529		15.189	0.609196	0.292358
	15.25	0.486067	0.389447		15.25	0.0046902	0.000980392		15.25	0.776271	0.288242
	15.311	0.494635	0.377734		15.311	0.00304706	0.000192157		15.311	0.89742	0.275795
	15.372	0.489204	0.381315		15.372	0.00356471	0.00561569		15.372	0.94211	0.282068
	15.433	0.664439	0.382538		15.433	0.00932549	0.00953725		15.433	0.973459	0.262627
	15.494	0.59822	0.369464		15.494	0.00447843	0.0135176		15.494	0.949839	0.264785
	15.555	0.602239	0.349738		15.555	0.0190667	0.0257137		15.555	0.954071	0.253816
	15.616	0.512663	0.3335		15.616	0.00210588	0.00525098		15.616	0.940361	0.23515
	15.677	0.470937	0.333716		15.677	0	0		15.677	0.960933	0.23631
	15.738	0.414773	0.311482		15.738	0.00186275	0.00186275		15.738	0.967224	0.249854
	15.799	0.398651	0.313424		15.799	0.00243922	0.00340784		15.799	0.880843	0.253045
	15.86	0.403137	0.321157		15.86	0.00133333	0.002		15.86	0.805906	0.209967
	15.921	0.358008	0.312727		15.921	0.000745098	0.00596863		15.921	0.820725	0.229021
	15.982	0.375596	0.29257		15.982	0.0111216	0.0240706		15.982	0.745031	0.206987
	16.043	0.288145	0.28576		16.043	0.0097098	0.0233882		16.043	0.658486	0.191467
	16.104	0.428569	0.289674		16.104	0.00941961	0.0200157		16.104	0.542929	0.197289
	16.165	0.479467	0.284478		16.165	0.0229451	0.0369137		16.165	0.442557	0.1714
	16.226	0.539051	0.268115		16.226	0.0199882	0.0347647		16.226	0.288129	0.144951
	16.287	0.527725	0.277277		16.287	0.0319725	0.051451		16.287	0.198239	0.127293
	16.348	0.615918	0.319753		16.348	0.00845882	0.0215176		16.348	0.163012	0.136012
	16.409	0.625427	0.317747		16.409	0.00188235	0.00907451		16.409	0.103227	0.122467
	16.47	0.554235	0.310913		16.47	0.00067451	0.00345098		16.47	0.0972784	0.111062
	16.531	0.478071	0.279553		16.531	0.00294118	0.0147059		16.531	0.0350471	0.10592
	16.592	0.463243	0.286299		16.592	0.017051	0.0544039		16.592	0.0176235	0.0960012
	16.653	0.42311	0.294801		16.653	0.0104863	0.0699882		16.653	0.0193216	0.093782
	16.714	0.474957	0.316874		16.714	0.0333882	0.125129		16.714	0.0106157	0.0789349
	16.775	0.444749	0.320326		16.775	0.0474039	0.17269		16.775	0.0227961	0.0801835
	16.836	0.488773	0.307189		16.836	0.030349	0.191122		16.836	0.0448627	0.0963776
	16.897	0.456992	0.296656		16.897	0.0445725	0.242341		16.897	0.0189961	0.111829
	16.958	0.512718	0.307145		16.958	0.092302	0.320008		16.958	0.0380667	0.113126
	17.019	0.561369	0.313085		17.019	0.087902	0.341443		17.019	0.0215725	0.0953294
	17.08	0.552757	0.29923		17.08	0.0544392	0.327502		17.08	0.0357098	0.110251
	17.141	0.552204	0.321178		17.141	0.0941098	0.380027		17.141	0.0255961	0.111688
	17.202	0.569533	0.297863		17.202	0.086498	0.380467		17.202	0.0331882	0.106225
	17.263	0.549184	0.292441		17.263	0.0853608	0.386588		17.263	0.0258667	0.0929345
	17.324	0.502396	0.314813		17.324	0.109314	0.427969		17.324	0.0241608	0.0790082
	17.385	0.492965	0.326806		17.385	0.104004	0.441192		17.385	0.043051	0.0827165
	17.446	0.496518	0.314724		17.446	0.0851451	0.434525		17.446	0.0396784	0.06802
	17.507	0.477792	0.324538		17.507	0.101094	0.460675		17.507	0.0183882	0.0685816
	17.568	0.441478	0.339588		17.568	0.114812	0.466933		17.568	0.0237569	0.0567008
	17.629	0.515843	0.369511		17.629	0.0959451	0.449196		17.629	0.00654118	0.0511129
	17.69	0.463761	0.376631		17.69	0.0892392	0.454627		17.69	0.00133333	0.043498
	17.751	0.486	0.388243		17.751	0.135914	0.518114		17.751	0.000537255	0.0383486
	17.812	0.448812	0.374862		17.812	0.118051	0.515584		17.812	0	0.0277275
	17.873	0.422878	0.39804		17.873	0.15202	0.557271		17.873	0.00213725	0.0348663
	17.934	0.487427	0.389617		17.934	0.112737	0.527898		17.934	0.0036902	0.0310792
	17.995	0.669529	0.378649		17.995	0.147341	0.550804		17.995	0.0110588	0.0336369
	18.056	0.719925	0.373961		18.056	0.111965	0.495647		18.056	0.00972157	0.0356027
	18.117	0.776043	0.390337		18.117	0.122584	0.488918		18.117	0.013902	0.0407804
	18.178	0.891325	0.39288		18.178	0.11831	0.446996		18.178	0.0166314	0.0406804
	18.239	0.926482	0.403646		18.239	0.100137	0.370514		18.239	0.00708628	0.0479031
	18.3	0.866459	0.372862		18.3	0.0381882	0.198031		18.3	0.0294353	0.0504588
	18.361	0.853608	0.371289		18.361	0.052651	0.257682		18.361	0.0429333	0.0539141
	18.422	0.925655	0.395848		18.422	0.0692667	0.306133		18.422	0.0183451	0.0485412
	18.483	0.940996	0.373629		18.483	0.0736353	0.316635		18.483	0.0120196	0.0479863
	18.544	0.91922	0.364861		18.544	0.0883098	0.347443		18.544	0.067251	0.0541494
	18.605	0.895925	0.375325		18.605	0.0723882	0.343137		18.605	0.0116784	0.0541957
	18.666	0.886835	0.355173		18.666	0.0885804	0.354455		18.666	0.0218078	0.0561608
	18.727	0.813188	0.356477		18.727	0.0846627	0.337027		18.727	0.0575412	0.0554737
	18.788	0.742592	0.389814		18.788	0.0728196	0.32162		18.788	0.000756863	0.0556122
	18.849	0.712827	0.391058		18.849	0.0865608	0.338314		18.849	0.00939608	0.0634745
	18.91	0.682263	0.386081		18.91	0.102463	0.351886		18.91	0.0391059	0.0602043
	18.971	0.49209	0.331229		18.971	0.0842275	0.321588		18.971	0.045349	0.0576906
	19.032	0.475675	0.335395		19.032	0.0625922	0.277867		19.032	0.0183686	0.0484153
	19.093	0.404902	0.312709		19.093	0.0457137	0.248176		19.093	0.0228667	0.0590404
	19.154	0.398914	0.32414		19.154	0.111647	0.314408		19.154	0.00990588	0.0649318
	19.215	0.432702	0.323302		19.215	0.0599608	0.252859		19.215	0.0117647	0.0709875
	19.276	0.444286	0.304158		19.276	0.051251	0.211129		19.276	0.0196588	0.0721267
	19.337	0.407686	0.305831		19.337	0.0138941	0.1408		19.337	0.012251	0.0922267
	19.398	0.354071	0.286732		19.398	0.0532118	0.163561		19.398	0.0297451	0.0907557
	19.459	0.321027	0.292309		19.459	0.0210196	0.123612		19.459	0.0226863	0.0918208
	19.52	0.306671	0.287352		19.52	0.0310471	0.112447		19.52	0.0296667	0.105046
	19.581	0.320157	0.295977		19.581	0.0116078	0.0745529		19.581	0.0592314	0.128979
	19.642	0.38842	0.313956		19.642	0.0416196	0.0980353		19.642	0.0446431	0.133742
	19.703	0.434984	0.295806		19.703	0.00912549	0.0463843		19.703	0.0506784	0.155331
	19.764	0.416173	0.295784		19.764	0.0266157	0.0718588		19.764	0.0496235	0.171586
	19.825	0.406671	0.316177		19.825	0.0138353	0.0661529		19.825	0.0507922	0.179355
	19.886	0.446475	0.346389		19.886	0.0300588	0.0977098		19.886	0.0410196	0.196674
	19.947	0.54809	0.355272		19.947	0.0329569	0.113694		19.947	0.0701137	0.217657
	20.008	0.571749	0.386124		20.008	0.0392118	0.118471		20.008	0.0716824	0.234097
	20.069	0.572333	0.386209		20.069	0.0320549	0.0941882		20.069	0.0678902	0.266132
	20.13	0.734153	0.428415		20.13	0.00967451	0.0525373		20.13	0.0835569	0.292693
	20.191	0.669851	0.462969		20.191	0.0326627	0.0876745		20.191	0.0612275	0.291507
	20.252	0.855463	0.487869		20.252	0.046149	0.142027		20.252	0.063749	0.292051
	20.313	0.967988	0.494995		20.313	0.0332235	0.126529		20.313	0.0776745	0.323817
	20.374	0.98078	0.493548		20.374	0.00262353	0.064498		20.374	0.102518	0.3258
	20.435	0.982984	0.498785		20.435	0.0118	0.0795294		20.435	0.0304667	0.349802
	20.496	0.980894	0.505724		20.496	0.013502	0.0712667		20.496	0.102051	0.361886
	20.557	0.946341	0.48898		20.557	0.0167216	0.072698		20.557	0.0760196	0.377437
	20.618	0.998533	0.503388		20.618	0.0141294	0.0603333		20.618	0.0877255	0.359005
	20.679	0.956263	0.521353		20.679	0.0814235	0.20571		20.679	0.0792314	0.353353
	20.74	0.865545	0.518217		20.74	0.0513569	0.198333		20.74	0.139239	0.328816
	20.801	0.874631	0.503676		20.801	0.0485608	0.215137		20.801	0.0845294	0.295559
	20.862	0.930686	0.52175		20.862	0.085498	0.260937		20.862	0.0876941	0.252892
	20.923	0.825941	0.495984		20.923	0.0669373	0.230761		20.923	0.156643	0.227924
	20.984	0.779482	0.482179		20.984	0.070851	0.222733		20.984	0.2274	0.182669
	21.045	0.789553	0.488367		21.045	0.0649098	0.210184		21.045	0.394357	0.150429
	21.106	0.624996	0.460931		21.106	0.0332745	0.156141		21.106	0.646094	0.143468
	21.167	0.896949	0.487586		21.167	0.0337333	0.123482		21.167	0.846945	0.150937
	21.228	0.878843	0.481313		21.228	0.0245451	0.0835765		21.228	0.927424	0.143486
	21.289	0.811773	0.480867		21.289	0.0143529	0.0830627		21.289	0.967769	0.130079
	21.35	0.84851	0.492758		21.35	0.0374627	0.138902		21.35	0.985467	0.143449
	21.411	0.848608	0.450827		21.411	0.0610902	0.206004		21.411	0.994796	0.138589
	21.472	0.938953	0.472953		21.472	0.0616196	0.235267		21.472	0.998651	0.142054
	21.533	0.964784	0.475913		21.533	0.0812471	0.272929		21.533	1	0.137327
	21.594	0.992255	0.493762		21.594	0.0689216	0.27409		21.594	0.979659	0.123216
	21.655	0.999314	0.475009		21.655	0.0722196	0.291094		21.655	0.990537	0.123323
	21.716	0.994792	0.441814		21.716	0.108518	0.332875		21.716	0.992729	0.130721
	21.777	0.992157	0.429204		21.777	0.0667216	0.294173		21.777	0.987373	0.131786
					21.838	0.111231	0.343051		21.838	0.999616	0.126628
					21.899	0.0654	0.331518		21.899	0.993812	0.132546
					21.96	0.1104	0.446859		21.96	0.992612	0.13864
					22.021	0.129412	0.545098		22.021	1	0.155786
									22.082	1	0.158285
									22.143	0.991827	0.147238
									22.204	0.985098	0.145614
									22.265	0.995816	0.143414
									22.326	0.986796	0.148713
									22.387	0.997424	0.157021
									22.448	0.988537	0.146664
									22.509	0.990714	0.140473
									22.57	0.992624	0.142833
									22.631	0.989325	0.138168
									22.692	0.999341	0.117908
									22.753	0.992098	0.110715
									22.814	0.996518	0.0987161
									22.875	0.995553	0.0998835
									22.936	0.994063	0.09856
									22.997	0.99491	0.102883
									23.058	0.971392	0.1046
									23.119	0.988463	0.103125
									23.18	0.996192	0.0944494
									23.241	0.991431	0.0973361
									23.302	0.996831	0.104379
									23.363	0.999718	0.114796
									23.424	0.992227	0.118697
									23.485	0.981953	0.124984
									23.546	0.999922	0.147153
									23.607	0.989467	0.145354
									23.668	0.972075	0.142955
									23.729	0.917647	0.157286
