# Supplementary material for: Interleukin-1 prevents SARS-CoV-2-induced membrane fusion to restrict viral transmission via induction of actin bundles
Source: eLife. 2025 Feb 12;13:RP98593. doi: 10.7554/eLife.98593 (PMC11820142; doi:10.7554/eLife.98593)
Supplement: Figure 7—source data 3. [file elife-98593-fig7-data3.xlsx]

## Sheet: Figure 7B
2024-10-14
Histopothology score
	PBS	mIL-1β	Y-27632 + mIL-1β
	5	10	20
	18	6	19
	15	3	15
	21	15	26
	16	12	10
	18	8	15
	10	4	18
	20	8	12

## Sheet: Figure 7C
2024-10-01
Relative expression (to Control)
	PBS	mIL-1β	Y-27632 + mIL-1β
	1.32859	0.577326	1.18361
	0.857887	0.981008	1.32023
	0.635328	0.61116	0.817064
	0.986383	0.498019	0.393948
	0.957858	0.736266	0.731125
	0.936242	0.448084	1.24808
	1.24566	0.336653	0.874161
	1.05205	0.374051	0.8791

## Sheet: Figure 7E
2024-10-15
Infected area (％)
	PBS	mIL-1β	Y-27632 + mIL-1β
	7.542	3.214	6.578
	7.482	1.246	2.216
	8.246	2.458	3.98
	3.104	5.548	6.218
	6.578	3.216	4.246
	6.528	1.258	3.218
	5.54	2.68	7.218
	5.212	3.528	4.254

## Sheet: Figure 7F
2024-10-18
Normalized intensity
	PBS				mIL-1β				Y-27632 + mIL-1β
	Length	N	F-actin		Length	N	F-actin		Length	N	F-actin
	0	0.735373	0.485616		0	0.215686	0.584314		0	0.980157	0.3196
	0.061	0.777169	0.50442		0.061	0.255063	0.595769		0.061	0.983855	0.305439
	0.122	0.793871	0.500671		0.122	0.283125	0.592639		0.122	0.988831	0.301141
	0.183	0.822569	0.510557		0.183	0.271157	0.553859		0.183	0.979263	0.271941
	0.244	0.844102	0.508918		0.244	0.277557	0.509537		0.244	0.971278	0.264224
	0.305	0.827067	0.480318		0.305	0.296082	0.446973		0.305	0.984506	0.282169
	0.366	0.789827	0.457686		0.366	0.338176	0.386024		0.366	0.992443	0.292698
	0.427	0.776698	0.460984		0.427	0.444725	0.396071		0.427	0.983827	0.290643
	0.488	0.788698	0.473816		0.488	0.481749	0.384208		0.488	0.975749	0.300522
	0.549	0.765325	0.447906		0.549	0.455537	0.356831		0.549	0.993961	0.342584
	0.61	0.766424	0.440482		0.61	0.449455	0.372051		0.61	0.991322	0.336035
	0.671	0.79891	0.447251		0.671	0.377906	0.314698		0.671	0.989341	0.342125
	0.732	0.822894	0.436957		0.732	0.43722	0.372784		0.732	0.983455	0.342835
	0.793	0.881741	0.44382		0.793	0.425024	0.392925		0.793	0.991271	0.3498
	0.854	0.921945	0.442851		0.854	0.370682	0.397584		0.854	0.984627	0.338318
	0.915	0.941494	0.437133		0.915	0.315706	0.385114		0.915	0.986098	0.346675
	0.976	0.966549	0.449502		0.976	0.276898	0.347839		0.976	0.98149	0.348035
	1.037	0.981169	0.448502		1.037	0.298737	0.360227		1.037	0.976722	0.356569
	1.098	0.985216	0.440267		1.098	0.318851	0.370376		1.098	0.981804	0.372667
	1.159	0.964969	0.427302		1.159	0.33171	0.384086		1.159	0.987055	0.383929
	1.22	0.989129	0.494706		1.22	0.384224	0.419259		1.22	0.985157	0.385827
	1.281	0.983251	0.493294		1.281	0.365996	0.390612		1.281	0.983573	0.383518
	1.342	0.982498	0.512216		1.342	0.319055	0.374878		1.342	0.971902	0.360416
	1.403	0.969839	0.514969		1.403	0.249929	0.363451		1.403	0.981314	0.362878
	1.464	0.95891	0.541275		1.464	0.226106	0.391012		1.464	0.981537	0.3656
	1.525	0.9286	0.562612		1.525	0.189541	0.354565		1.525	0.988988	0.40102
	1.586	0.924522	0.606384		1.586	0.234459	0.350831		1.586	0.99189	0.422698
	1.647	0.859188	0.580839		1.647	0.360631	0.395165		1.647	0.980369	0.410631
	1.708	0.813961	0.559918		1.708	0.44682	0.395886		1.708	0.983467	0.402875
	1.769	0.853169	0.596545		1.769	0.500506	0.3778		1.769	0.992008	0.398212
	1.83	0.854604	0.559973		1.83	0.502184	0.367863		1.83	0.985682	0.382718
	1.891	0.911047	0.562435		1.891	0.484396	0.396302		1.891	0.989682	0.400337
	1.952	0.939004	0.544286		1.952	0.42229	0.364533		1.952	0.980141	0.354859
	2.013	0.965745	0.54358		2.013	0.550051	0.461243		2.013	0.984212	0.352231
	2.074	0.983047	0.539086		2.074	0.693286	0.525835		2.074	0.977345	0.318129
	2.135	0.988584	0.551733		2.135	0.847565	0.570753		2.135	0.983122	0.297184
	2.196	0.981592	0.557431		2.196	0.920533	0.584157		2.196	0.964294	0.258541
	2.257	0.987157	0.587941		2.257	0.946443	0.581416		2.257	0.975004	0.27489
	2.318	0.993906	0.608686		2.318	0.959976	0.612769		2.318	0.963369	0.279086
	2.379	0.9828	0.597949		2.379	0.959796	0.6406		2.379	0.956976	0.280227
	2.44	0.97249	0.580875		2.44	0.925478	0.63318		2.44	0.921078	0.259855
	2.501	0.980459	0.586439		2.501	0.857761	0.599812		2.501	0.920329	0.268416
	2.562	0.976957	0.567114		2.562	0.82198	0.594259		2.562	0.899004	0.256498
	2.623	0.978471	0.573847		2.623	0.785871	0.5672		2.623	0.867227	0.239325
	2.684	0.961973	0.567945		2.684	0.804231	0.614737		2.684	0.824537	0.214349
	2.745	0.932996	0.570769		2.745	0.656965	0.536098		2.745	0.783839	0.203502
	2.806	0.902106	0.574494		2.806	0.559686	0.494482		2.806	0.749906	0.198898
	2.867	0.888369	0.579875		2.867	0.550922	0.509682		2.867	0.729741	0.205957
	2.928	0.890996	0.607471		2.928	0.573141	0.517224		2.928	0.703816	0.21538
	2.989	0.844388	0.585631		2.989	0.584129	0.488114		2.989	0.667812	0.211341
	3.05	0.822471	0.562016		3.05	0.623949	0.489839		3.05	0.652902	0.221792
	3.111	0.825035	0.549012		3.111	0.6946	0.500894		3.111	0.656663	0.255584
	3.172	0.852784	0.561098		3.172	0.816478	0.536114		3.172	0.60471	0.256682
	3.233	0.857294	0.553553		3.233	0.865176	0.524204		3.233	0.598027	0.314173
	3.294	0.900063	0.587996		3.294	0.906086	0.539573		3.294	0.604047	0.363627
	3.355	0.891345	0.581882		3.355	0.850773	0.543196		3.355	0.581702	0.354196
	3.416	0.874784	0.587867		3.416	0.685184	0.503051		3.416	0.576	0.342914
	3.477	0.826129	0.573012		3.477	0.538431	0.494294		3.477	0.613992	0.361584
	3.538	0.766392	0.536114		3.538	0.460682	0.455353		3.538	0.630843	0.353949
	3.599	0.739498	0.543333		3.599	0.536247	0.479243		3.599	0.593906	0.306082
	3.66	0.684298	0.513392		3.66	0.625478	0.462749		3.66	0.559737	0.2958
	3.721	0.637827	0.489694		3.721	0.783608	0.477714		3.721	0.493827	0.280475
	3.782	0.625565	0.497725		3.782	0.916588	0.491455		3.782	0.41209	0.244322
	3.843	0.654133	0.540588		3.843	0.978867	0.513231		3.843	0.340027	0.2096
	3.904	0.666855	0.552149		3.904	0.995071	0.55738		3.904	0.291753	0.202478
	3.965	0.698776	0.549035		3.965	0.997969	0.581216		3.965	0.219471	0.190863
	4.026	0.731408	0.511553		4.026	1	0.601314		4.026	0.145937	0.172482
	4.087	0.847341	0.549047		4.087	0.978431	0.596078		4.087	0.113933	0.174078
	4.148	0.891384	0.530176		4.148	0.986169	0.634063		4.148	0.0815922	0.15929
	4.209	0.913141	0.504275		4.209	0.996937	0.630753		4.209	0.0889961	0.195525
	4.27	0.959369	0.525208		4.27	0.994984	0.608259		4.27	0.0766941	0.201671
	4.331	0.971153	0.530945		4.331	0.98429	0.573682		4.331	0.0633804	0.188039
	4.392	0.9668	0.53111		4.392	0.998259	0.576718		4.392	0.0444275	0.15462
	4.453	0.975094	0.557588		4.453	0.989706	0.559784		4.453	0.0545137	0.166271
	4.514	0.974749	0.578137		4.514	0.994153	0.565275		4.514	0.0660039	0.189635
	4.575	0.953498	0.589439		4.575	0.988894	0.552094		4.575	0.0409882	0.161059
	4.636	0.944953	0.602424		4.636	0.998596	0.608255		4.636	0.0504667	0.160914
	4.697	0.941514	0.598886		4.697	0.99678	0.635416		4.697	0.0387922	0.129365
	4.758	0.938847	0.597596		4.758	0.984545	0.653302		4.758	0.0470157	0.128341
	4.819	0.930969	0.574173		4.819	0.992616	0.691478		4.819	0.0509686	0.113569
	4.88	0.935494	0.595102		4.88	0.993773	0.706302		4.88	0.0559137	0.0997412
	4.941	0.923737	0.590957		4.941	0.994314	0.676749		4.941	0.0775608	0.101996
	5.002	0.885651	0.564937		5.002	0.9948	0.629016		5.002	0.084498	0.0960824
	5.063	0.843569	0.545976		5.063	0.971694	0.564918		5.063	0.0860941	0.0999961
	5.124	0.812435	0.545933		5.124	0.967035	0.552902		5.124	0.0857451	0.111988
	5.185	0.754396	0.514455		5.185	0.955753	0.557275		5.185	0.0925059	0.131004
	5.246	0.699373	0.472263		5.246	0.89698	0.513678		5.246	0.0833725	0.132486
	5.307	0.667082	0.430565		5.307	0.925675	0.554122		5.307	0.0814824	0.150902
	5.368	0.64142	0.396102		5.368	0.976016	0.611937		5.368	0.0792706	0.162416
	5.429	0.60902	0.365176		5.429	0.998004	0.678412		5.429	0.111102	0.178722
	5.49	0.592082	0.358573		5.49	0.996227	0.703929		5.49	0.189325	0.194086
	5.551	0.562486	0.354682		5.551	0.993141	0.709392		5.551	0.318984	0.216373
	5.612	0.537192	0.354157		5.612	0.997776	0.7314		5.612	0.490404	0.258808
	5.673	0.521306	0.357976		5.673	0.999933	0.739937		5.673	0.634016	0.293106
	5.734	0.531306	0.385588		5.734	0.998396	0.706612		5.734	0.730569	0.338494
	5.795	0.566427	0.425984		5.795	0.989961	0.644529		5.795	0.740224	0.367408
	5.856	0.583722	0.442153		5.856	0.993239	0.620569		5.856	0.729369	0.392882
	5.917	0.567996	0.432086		5.917	0.997255	0.593608		5.917	0.728541	0.402459
	5.978	0.525522	0.39938		5.978	0.997424	0.555937		5.978	0.749224	0.408988
	6.039	0.527898	0.415992		6.039	0.990553	0.535682		6.039	0.764953	0.41751
	6.1	0.526616	0.4314		6.1	0.964635	0.467929		6.1	0.755039	0.428663
	6.161	0.499471	0.422173		6.161	0.999094	0.479278		6.161	0.738894	0.461749
	6.222	0.476478	0.412471		6.222	0.984431	0.421008		6.222	0.66742	0.473749
	6.283	0.473463	0.429016		6.283	0.99298	0.414596		6.283	0.592522	0.491408
	6.344	0.456933	0.424		6.344	0.995878	0.3784		6.344	0.547757	0.502431
	6.405	0.477345	0.430902		6.405	0.996427	0.355824		6.405	0.512165	0.469067
	6.466	0.493875	0.409604		6.466	0.990694	0.337031		6.466	0.507906	0.446122
	6.527	0.550447	0.396259		6.527	0.986639	0.318475		6.527	0.460906	0.370373
	6.588	0.601867	0.359616		6.588	0.999557	0.292839		6.588	0.413608	0.301506
	6.649	0.704969	0.375588		6.649	0.997227	0.275616		6.649	0.3504	0.253753
	6.71	0.778024	0.37078		6.71	0.992898	0.264424		6.71	0.258863	0.203984
	6.771	0.813055	0.359718		6.771	0.941588	0.232251		6.771	0.171282	0.160561
	6.832	0.829439	0.357965		6.832	0.891718	0.218561		6.832	0.105486	0.122043
	6.893	0.841663	0.359475		6.893	0.86118	0.238753		6.893	0.0645137	0.0886235
	6.954	0.837898	0.350004		6.954	0.814863	0.234004		6.954	0.0435686	0.0694353
	7.015	0.827388	0.360314		7.015	0.792682	0.220863		7.015	0.0292235	0.0531098
	7.076	0.804082	0.359349		7.076	0.857827	0.242769		7.076	0.0127373	0.0293569
	7.137	0.771239	0.323506		7.137	0.915518	0.242471		7.137	0.0145098	0.0276275
	7.198	0.791133	0.319192		7.198	0.946216	0.232314		7.198	0.0202039	0.0280863
	7.259	0.808792	0.30931		7.259	0.951384	0.237784		7.259	0.0191529	0.0138275
	7.32	0.832627	0.309302		7.32	0.926373	0.222333		7.32	0.0249373	0.0131412
	7.381	0.833247	0.281871		7.381	0.942373	0.235408		7.381	0.0141686	0.00662745
	7.442	0.838012	0.280373		7.442	0.969941	0.23189		7.442	0.00169804	0.000980392
	7.503	0.799776	0.266914		7.503	0.991404	0.227639		7.503	0.00198039	0.00239608
	7.564	0.730992	0.241267		7.564	0.989675	0.22142		7.564	0.00128235	0.00450588
	7.625	0.654063	0.211506		7.625	0.998067	0.227184		7.625	0.00270588	0.0085451
	7.686	0.591251	0.213298		7.686	0.999702	0.231765		7.686	0.0044549	0.00747843
	7.747	0.483592	0.205459		7.747	0.997945	0.23418		7.747	0.00319608	0.00458824
	7.808	0.367733	0.20182		7.808	0.988188	0.23658		7.808	0.00198039	0.00282745
	7.869	0.241675	0.159392		7.869	0.997671	0.273333		7.869	0.00351765	0.00606667
	7.93	0.159533	0.136227		7.93	0.989541	0.266102		7.93	0.00340784	0.00604314
	7.991	0.0987843	0.118808		7.991	0.99058	0.268757		7.991	0.00113725	0.00254902
	8.052	0.0854431	0.130796		8.052	0.991545	0.287671		8.052	0.00776863	0.0107412
	8.113	0.0693608	0.119643		8.113	0.955173	0.284749		8.113	0.0033451	0.0065451
	8.174	0.0631647	0.109761		8.174	0.913725	0.278431		8.174	0.00278039	0.00509412
	8.235	0.0579373	0.0988275		8.235	0.909208	0.335208		8.235	0.00347451	0.00589412
	8.296	0.0494902	0.0834		8.296	0.87918	0.414604		8.296	0.00553725	0.0109059
	8.357	0.0498118	0.0736824		8.357	0.639659	0.355141		8.357	0.00310196	0.00792549
	8.418	0.0474431	0.0607373		8.418	0.451416	0.355412		8.418	0.00465882	0.00941177
	8.479	0.0577216	0.0648118		8.479	0.302114	0.366396		8.479	0.00539216	0.00908627
	8.54	0.0330941	0.0378588		8.54	0.133718	0.316125		8.54	0.00197255	0.00454118
	8.601	0.0341059	0.0397882		8.601	0.136478	0.41718		8.601	0.00179608	0.00417255
	8.662	0.0415176	0.0519804		8.662	0.065	0.435624		8.662	0.00224706	0.00626667
	8.723	0.0447608	0.0571529		8.723	0.0336118	0.477008		8.723	0.00599216	0.0122118
	8.784	0.032902	0.0399843		8.784	0.00761569	0.504129		8.784	0.00637255	0.0132784
	8.845	0.0368863	0.040549		8.845	0.0133098	0.566314		8.845	0.00950588	0.0164784
	8.906	0.0317725	0.0378941		8.906	0	0.598153		8.906	0.00473333	0.00723922
	8.967	0.0270431	0.0337686		8.967	0	0.656596		8.967	0.00216471	0.00291372
	9.028	0.0333608	0.0368824		9.028	0.00842353	0.752447		9.028	0.00414118	0.00416863
	9.089	0.0352157	0.0362941		9.089	0.0224588	0.852757		9.089	0.00381569	0.00434902
	9.15	0.0327137	0.0315059		9.15	0.0332	0.938706		9.15	0.00442745	0.00510588
	9.211	0.0298706	0.0260118		9.211	0.0695333	0.997745		9.211	0.00446274	0.00644706
	9.272	0.0362667	0.0296706		9.272	0.081902	0.996227		9.272	0.00587843	0.00884706
	9.333	0.0345098	0.0259176		9.333	0.0497333	0.975702		9.333	0.00791765	0.00921569
	9.394	0.0378941	0.024549		9.394	0.0409804	0.993863		9.394	0.00709804	0.0104392
	9.455	0.0284941	0.0128784		9.455	0.0228078	0.992067		9.455	0.00356078	0.0048
	9.516	0.0454039	0.0277843		9.516	0.0271765	0.995502		9.516	0.00327059	0.00456078
	9.577	0.0386902	0.0230157		9.577	0.0114706	0.994965		9.577	0.00603529	0.00804314
	9.638	0.039349	0.0217647		9.638	0.0126627	0.998341		9.638	0.00693333	0.00748627
	9.699	0.0416392	0.0223647		9.699	0.00218039	0.997592		9.699	0.00852157	0.00918823
	9.76	0.0431216	0.0228392		9.76	0.00352941	0.999776		9.76	0.00893333	0.0123098
	9.821	0.0437373	0.0208824		9.821	0.00350588	0.997031		9.821	0.0104235	0.0132039
	9.882	0.0516745	0.031098		9.882	0.00530588	0.999718		9.882	0.00409804	0.00724314
	9.943	0.0490353	0.0333176		9.943	0.00437647	0.994396		9.943	0.00663529	0.0114745
	10.004	0.0419137	0.0215216		10.004	0.00346667	0.989733		10.004	0.00576471	0.0101686
	10.065	0.0544196	0.0323216		10.065	0.00967059	0.992698		10.065	0.00704706	0.0100471
	10.126	0.0557961	0.037851		10.126	0.00711765	0.997463		10.126	0.00358823	0.00491372
	10.187	0.050498	0.0375961		10.187	0.0106	0.995275		10.187	0.00571765	0.00753725
	10.248	0.0550549	0.0395843		10.248	0.0187765	0.984671		10.248	0.00729804	0.0111529
	10.309	0.0453725	0.0318275		10.309	0.0152	0.967655		10.309	0.00251373	0.00756078
	10.37	0.0459176	0.0389373		10.37	0.0235725	0.974075		10.37	0.00247451	0.0084
	10.431	0.0495804	0.0475137		10.431	0.0371294	0.986937		10.431	0.0118667	0.0195333
	10.492	0.054902	0.0528078		10.492	0.0348706	0.9844		10.492	0.00259216	0.00790196
	10.553	0.0450627	0.0410431		10.553	0.0740235	0.998643		10.553	0.00206667	0.00812941
	10.614	0.0420549	0.0395882		10.614	0.0904078	0.992733		10.614	0.00372549	0.0103725
	10.675	0.0413412	0.0404196		10.675	0.113749	0.999902		10.675	0.0141255	0.0245608
	10.736	0.0456353	0.0467176		10.736	0.141722	0.996455		10.736	0.00861177	0.0200235
	10.797	0.0446627	0.050702		10.797	0.149584	0.998871		10.797	0.00419216	0.0136588
	10.858	0.0456706	0.0545843		10.858	0.0907255	0.994235		10.858	0.0112863	0.0195451
	10.919	0.0447725	0.0512549		10.919	0.0570431	0.999369		10.919	0.0132667	0.0209882
	10.98	0.0451725	0.0539529		10.98	0.0458275	1		10.98	0.0197216	0.0282392
	11.041	0.0562118	0.0707608		11.041	0.0232157	0.995922		11.041	0.0129412	0.023549
	11.102	0.0530431	0.074251		11.102	0.0148941	0.997663		11.102	0.00717647	0.0190588
	11.163	0.0638157	0.0883451		11.163	0.0125882	0.994867		11.163	0.0147137	0.0301922
	11.224	0.0723922	0.0960588		11.224	0.0162627	0.987769		11.224	0.0139804	0.0384275
	11.285	0.0660118	0.0862118		11.285	0.0280235	0.998392		11.285	0.0136275	0.0430235
	11.346	0.0811961	0.105404		11.346	0.00593333	0.992976		11.346	0.0192588	0.0536667
	11.407	0.081051	0.105133		11.407	0.00984706	0.995329		11.407	0.0223882	0.0634627
	11.468	0.0747098	0.0920275		11.468	0.0129216	0.995796		11.468	0.020949	0.0548588
	11.529	0.0928235	0.105047		11.529	0.00927843	0.996176		11.529	0.0128471	0.0431451
	11.59	0.0743804	0.0859529		11.59	0.00620784	0.992043		11.59	0.0167961	0.0446706
	11.651	0.0679725	0.077549		11.651	0.034549	0.996941		11.651	0.0118902	0.0386
	11.712	0.0695882	0.0795137		11.712	0.0314275	0.991102		11.712	0.0208039	0.0457647
	11.773	0.073102	0.0821725		11.773	0.0571333	0.996035		11.773	0.0283843	0.0442314
	11.834	0.0793451	0.0922235		11.834	0.0320745	0.996435		11.834	0.0364353	0.0398431
	11.895	0.0762078	0.0955059		11.895	0.00735686	0.995565		11.895	0.0258549	0.0263882
	11.956	0.0836706	0.107294		11.956	0	0.993384		11.956	0.0220471	0.0288902
	12.017	0.0722	0.094902		12.017	0.0013451	0.996067		12.017	0.0215412	0.0361569
	12.078	0.0701216	0.0983725		12.078	0.0173647	0.999882		12.078	0.0148706	0.0394824
	12.139	0.0970196	0.134369		12.139	0.019902	0.990906		12.139	0.0148667	0.0449569
	12.2	0.0815686	0.121675		12.2	0.0399176	0.992431		12.2	0.0143725	0.0412118
	12.261	0.0662392	0.106024		12.261	0.0588235	0.986275		12.261	0.0168667	0.0322314
	12.322	0.0874235	0.126737		12.322	0.113227	0.988141		12.322	0.0246196	0.0305843
	12.383	0.0642863	0.102118		12.383	0.196282	0.988192		12.383	0.0339137	0.0344275
	12.444	0.0700745	0.1094		12.444	0.287325	0.999592		12.444	0.0383647	0.0451765
	12.505	0.0763333	0.117694		12.505	0.330804	0.998976		12.505	0.0510784	0.0776863
	12.566	0.0707961	0.113302		12.566	0.291706	0.994616		12.566	0.0507529	0.0916745
	12.627	0.0731725	0.111216		12.627	0.249698	0.987		12.627	0.0562824	0.0996824
	12.688	0.0715765	0.101365		12.688	0.158	0.931039		12.688	0.0635373	0.0990784
	12.749	0.0724627	0.0954353		12.749	0.110435	0.909882		12.749	0.0918706	0.123675
	12.81	0.0851961	0.104361		12.81	0.0737529	0.875792		12.81	0.13069	0.171573
	12.871	0.0934588	0.105557		12.871	0.0181412	0.788922		12.871	0.176835	0.243298
	12.932	0.0916	0.0927961		12.932	0.030451	0.814682		12.932	0.229561	0.314894
	12.993	0.106318	0.0996039		12.993	0.033051	0.827588		12.993	0.264455	0.357612
	13.054	0.116651	0.11298		13.054	0.0252667	0.817714		13.054	0.309643	0.407769
	13.115	0.13378	0.133376		13.115	0.0395961	0.855247		13.115	0.369855	0.468753
	13.176	0.117843	0.114584		13.176	0.0406745	0.901008		13.176	0.43102	0.518506
	13.237	0.119263	0.110671		13.237	0.0816549	0.957573		13.237	0.508792	0.555204
	13.298	0.124969	0.121353		13.298	0.1206	0.997431		13.298	0.541882	0.534039
	13.359	0.103698	0.116227		13.359	0.0996745	0.99309		13.359	0.611659	0.572051
	13.42	0.0984431	0.125145		13.42	0.0446078	0.966024		13.42	0.628663	0.581055
	13.481	0.0940392	0.135976		13.481	0.0308392	0.979027		13.481	0.685255	0.629961
	13.542	0.0977529	0.15802		13.542	0.0303216	0.994796		13.542	0.683749	0.606584
	13.603	0.0836471	0.169796		13.603	0.0247216	0.98451		13.603	0.705576	0.598169
	13.664	0.10589	0.212937		13.664	0.0661333	0.976376		13.664	0.761941	0.610031
	13.725	0.124973	0.255247		13.725	0.170314	0.979827		13.725	0.802498	0.60778
	13.786	0.124745	0.273549		13.786	0.227475	0.954918		13.786	0.7918	0.562961
	13.847	0.127627	0.27742		13.847	0.244298	0.916914		13.847	0.791012	0.546016
	13.908	0.131957	0.266682		13.908	0.260569	0.926769		13.908	0.771671	0.539231
	13.969	0.131886	0.249255		13.969	0.160451	0.802984		13.969	0.735961	0.502024
	14.03	0.130412	0.236306		14.03	0.282643	0.874506		14.03	0.747675	0.475192
	14.091	0.121702	0.214647		14.091	0.239514	0.830647		14.091	0.773494	0.436976
	14.152	0.125686	0.199075		14.152	0.178075	0.796557		14.152	0.809624	0.415714
	14.213	0.132247	0.181702		14.213	0.110933	0.748427		14.213	0.812251	0.397529
	14.274	0.1304	0.169651		14.274	0.0315686	0.688192		14.274	0.719737	0.33949
	14.335	0.108408	0.15189		14.335	0.0283647	0.6904		14.335	0.613608	0.314031
	14.396	0.115808	0.160608		14.396	4.70588e-05	0.624741		14.396	0.512702	0.298937
	14.457	0.121694	0.166675		14.457	0.00683137	0.627506		14.457	0.431216	0.288741
	14.518	0.124188	0.167839		14.518	0.008	0.628588		14.518	0.3616	0.271161
	14.579	0.154525	0.187494		14.579	0.00352549	0.599282		14.579	0.324463	0.269831
	14.64	0.219749	0.215102		14.64	0.0104588	0.592733		14.64	0.332922	0.287365
	14.701	0.282388	0.215969		14.701	0.0148235	0.597075		14.701	0.325553	0.274165
	14.762	0.346675	0.217722		14.762	0.00790588	0.594922		14.762	0.372071	0.308404
	14.823	0.417753	0.24858		14.823	0.00174118	0.559404		14.823	0.399839	0.305957
	14.884	0.410153	0.249553		14.884	0.00436471	0.578459		14.884	0.451118	0.307176
	14.945	0.375353	0.268957		14.945	0.0173333	0.601941		14.945	0.483973	0.296616
	15.006	0.325125	0.290647		15.006	0.00665098	0.581702		15.006	0.511282	0.288286
	15.067	0.26949	0.28822		15.067	0.0147686	0.565969		15.067	0.537267	0.291184
	15.128	0.247455	0.29598		15.128	0.0323686	0.573643		15.128	0.553212	0.32149
	15.189	0.200314	0.265651		15.189	0.00422745	0.492839		15.189	0.512176	0.325502
	15.25	0.218282	0.286314		15.25	0.00432549	0.47062		15.25	0.516451	0.384467
	15.311	0.23229	0.279737		15.311	0.00816863	0.443702		15.311	0.51411	0.429239
	15.372	0.275	0.291051		15.372	0.00423922	0.4126		15.372	0.483286	0.440329
	15.433	0.285545	0.277451		15.433	0	0.378718		15.433	0.443247	0.445925
	15.494	0.314318	0.280976		15.494	0.00218039	0.367114		15.494	0.410682	0.446557
	15.555	0.324384	0.260329		15.555	0.0229451	0.403745		15.555	0.404765	0.440078
	15.616	0.365231	0.272804		15.616	0.00770196	0.395518		15.616	0.450071	0.459094
	15.677	0.414773	0.281945		15.677	0.0105333	0.403114		15.677	0.513812	0.458329
	15.738	0.439486	0.26782		15.738	0.00837647	0.407529		15.738	0.635694	0.472196
	15.799	0.45149	0.268439		15.799	0.00764706	0.421584		15.799	0.736682	0.455435
	15.86	0.427365	0.265561		15.86	0.0157647	0.452149		15.86	0.826678	0.443604
	15.921	0.370757	0.238871		15.921	0.00913333	0.467663		15.921	0.835612	0.373251
	15.982	0.386914	0.259788		15.982	0.00854118	0.470647		15.982	0.8736	0.375835
	16.043	0.400651	0.267282		16.043	0.0189882	0.527345		16.043	0.882463	0.389522
	16.104	0.406698	0.270118		16.104	0.0145137	0.543675		16.104	0.807094	0.334973
	16.165	0.415776	0.273675		16.165	0.0167608	0.53509		16.165	0.786635	0.347349
	16.226	0.451671	0.297082		16.226	0.014949	0.512886		16.226	0.738184	0.331847
	16.287	0.447765	0.269886		16.287	0.00132157	0.456616		16.287	0.715941	0.316502
	16.348	0.465165	0.261365		16.348	1.81647e-24	0.403922		16.348	0.758773	0.329992
	16.409	0.464776	0.240976		16.409	0.0134745	0.370608		16.409	0.829537	0.375827
	16.47	0.517984	0.270961		16.47	0.0064902	0.321698		16.47	0.855694	0.395118
	16.531	0.539957	0.258573		16.531	0.00693333	0.289604		16.531	0.854757	0.402125
	16.592	0.545184	0.245953		16.592	0.00885882	0.269106		16.592	0.87031	0.425161
	16.653	0.5416	0.247149		16.653	0.0156039	0.276533		16.653	0.875824	0.409118
	16.714	0.554325	0.251325		16.714	0.0172235	0.257298		16.714	0.897749	0.391663
	16.775	0.565196	0.231827		16.775	0.00323922	0.220839		16.775	0.927431	0.387455
	16.836	0.593086	0.239455		16.836	0.00277647	0.213737		16.836	0.928416	0.357749
	16.897	0.599863	0.252569		16.897	0	0.201761		16.897	0.961349	0.355843
	16.958	0.53471	0.212286		16.958	0.00190196	0.203459		16.958	0.962494	0.318122
	17.019	0.524875	0.220388		17.019	0.0100157	0.214259		17.019	0.962631	0.299212
	17.08	0.497482	0.225357		17.08	0.00536078	0.21138		17.08	0.96502	0.273973
	17.141	0.454388	0.22071		17.141	0.00014902	0.189227		17.141	0.964086	0.269541
	17.202	0.422078	0.222255		17.202	0.0123529	0.217153		17.202	0.955286	0.291671
	17.263	0.406792	0.243855		17.263	0.0095098	0.213694		17.263	0.939361	0.326525
	17.324	0.351686	0.236004		17.324	0.0104824	0.21018		17.324	0.883133	0.331514
	17.385	0.297463	0.224733		17.385	0.0142353	0.202545		17.385	0.825875	0.354612
	17.446	0.274282	0.227855		17.446	0.0100314	0.195173		17.446	0.745243	0.36891
	17.507	0.259275	0.225631		17.507	0.00400392	0.188298		17.507	0.688231	0.403914
	17.568	0.254655	0.232102		17.568	0.00196471	0.178396		17.568	0.681549	0.455624
	17.629	0.262549	0.240361		17.629	0.000972549	0.179588		17.629	0.702549	0.497259
	17.69	0.258651	0.204749		17.69	0.00471765	0.177949		17.69	0.73762	0.532733
	17.751	0.35222	0.246533		17.751	0.00702353	0.163827		17.751	0.754016	0.514314
	17.812	0.374035	0.235443		17.812	0.00124706	0.14802		17.812	0.816176	0.517906
	17.873	0.378522	0.231329		17.873	0.00145882	0.135416		17.873	0.864196	0.517259
	17.934	0.374141	0.226553		17.934	0.000866667	0.133525		17.934	0.892204	0.484094
	17.995	0.354847	0.225557		17.995	0.00536078	0.158608		17.995	0.933855	0.467369
	18.056	0.313514	0.222478		18.056	0.0189529	0.182486		18.056	0.968447	0.450318
	18.117	0.271463	0.217227		18.117	0.0145647	0.15662		18.117	0.960255	0.416706
	18.178	0.260329	0.221902		18.178	0.0199373	0.157745		18.178	0.965047	0.421486
	18.239	0.279365	0.232482		18.239	0.0105255	0.142322		18.239	0.952333	0.439933
	18.3	0.263278	0.200482		18.3	0.00641569	0.139737		18.3	0.903482	0.42011
	18.361	0.257824	0.207886		18.361	0.00385098	0.141937		18.361	0.87731	0.425486
	18.422	0.209702	0.190576		18.422	0.00490588	0.140122		18.422	0.836463	0.410769
	18.483	0.191525	0.201624		18.483	0.00715294	0.142957		18.483	0.811196	0.410153
	18.544	0.177047	0.211569		18.544	0.00863137	0.149808		18.544	0.801024	0.414459
	18.605	0.155584	0.212275		18.605	0.00695686	0.147851		18.605	0.77882	0.419447
	18.666	0.147627	0.216682		18.666	0.00218039	0.148949		18.666	0.766341	0.437424
	18.727	0.124725	0.199196		18.727	1.96078e-05	0.169533		18.727	0.766682	0.452278
	18.788	0.127855	0.199965		18.788	0.0214039	0.214565		18.788	0.750118	0.428973
	18.849	0.149259	0.203204		18.849	0.0161843	0.216851		18.849	0.774165	0.406392
	18.91	0.175765	0.193808		18.91	0.00464706	0.185514		18.91	0.776216	0.348259
	18.971	0.194439	0.185847		18.971	0.0132941	0.197851		18.971	0.792608	0.310518
	19.032	0.203067	0.19038		19.032	0.00728628	0.187153		19.032	0.80998	0.2874
	19.093	0.21071	0.213239		19.093	0.00660784	0.179125		19.093	0.784075	0.257584
	19.154	0.183612	0.204439		19.154	0.0221804	0.184835		19.154	0.74742	0.233227
	19.215	0.172275	0.202353		19.215	0.00875294	0.162149		19.215	0.66551	0.1704
	19.276	0.175075	0.20391		19.276	0.00620392	0.160392		19.276	0.609847	0.153404
	19.337	0.180929	0.196949		19.337	0.00794902	0.164439		19.337	0.590933	0.158984
	19.398	0.206475	0.195851		19.398	0.000431373	0.164753		19.398	0.616486	0.17889
	19.459	0.224455	0.192314		19.459	8.62745e-05	0.176533		19.459	0.645404	0.172
	19.52	0.227271	0.18669		19.52	0.000996078	0.175114		19.52	0.714988	0.186694
	19.581	0.22858	0.190965		19.581	0.00171765	0.176216		19.581	0.771373	0.189737
	19.642	0.224392	0.197506		19.642	0.000211765	0.193467		19.642	0.781208	0.168561
	19.703	0.204161	0.195235		19.703	0.00670588	0.21342		19.703	0.809318	0.184569
	19.764	0.178839	0.195016		19.764	7.84314e-05	0.208118		19.764	0.818322	0.172431
	19.825	0.16591	0.209129		19.825	0.00229412	0.252729		19.825	0.841898	0.193216
	19.886	0.152086	0.216941		19.886	0.00298431	0.267016		19.886	0.831416	0.201784
	19.947	0.144757	0.220627		19.947	0.00976863	0.218278		19.947	0.835757	0.1992
	20.008	0.146651	0.223314		20.008	0.0015098	0.217882		20.008	0.878129	0.239718
	20.069	0.16858	0.240765		20.069	0	0.239345		20.069	0.907769	0.262827
	20.13	0.167788	0.228875		20.13	0.00393333	0.245216		20.13	0.930263	0.297592
	20.191	0.191796	0.238408		20.191	0.00241569	0.22138		20.191	0.953957	0.329859
	20.252	0.222765	0.257404		20.252	0	0.201345		20.252	0.953941	0.317506
	20.313	0.232741	0.260694		20.313	0	0.218773		20.313	0.956843	0.339537
	20.374	0.229263	0.252078		20.374	0.0113647	0.234325		20.374	0.959255	0.342106
	20.435	0.225722	0.246255		20.435	0.00392157	0.223529		20.435	0.960337	0.316902
	20.496	0.245584	0.257216		20.496	0.00119216	0.200192		20.496	0.978957	0.323702
	20.557	0.249082	0.255639		20.557	0.000454902	0.202384		20.557	0.971533	0.281188
	20.618	0.248835	0.244525		20.618	0.00931373	0.206365		20.618	0.971875	0.260129
	20.679	0.243733	0.231749		20.679	0.00271373	0.180929		20.679	0.985467	0.274533
	20.74	0.266918	0.276122		20.74	0.00538431	0.201651		20.74	0.977443	0.285039
	20.801	0.209051	0.25429		20.801	0.00366274	0.206969		20.801	0.969682	0.281855
	20.862	0.193596	0.254459		20.862	0.00837647	0.218737		20.862	0.969416	0.273867
	20.923	0.168553	0.220847		20.923	0.0116824	0.222918		20.923	0.983435	0.289749
	20.984	0.184957	0.222373		20.984	0.00298824	0.231667		20.984	0.967506	0.275106
	21.045	0.226271	0.247827		21.045	0.00272941	0.234439		21.045	0.934008	0.24089
	21.106	0.238173	0.243988		21.106	0.0016	0.245576		21.106	0.957843	0.27429
	21.167	0.289749	0.277945		21.167	0.00200784	0.254678		21.167	0.935204	0.252576
	21.228	0.311643	0.265588		21.228	0.00723529	0.2668		21.228	0.941153	0.272455
	21.289	0.363773	0.265357		21.289	0.00833333	0.290208		21.289	0.935545	0.25398
	21.35	0.442863	0.277031		21.35	0.0180745	0.320702		21.35	0.955847	0.245855
	21.411	0.51238	0.271235		21.411	0.0141137	0.324694		21.411	0.971906	0.244204
	21.472	0.561482	0.262263		21.472	0.00619216	0.306643		21.472	0.983392	0.255102
	21.533	0.576765	0.244596		21.533	0.00760784	0.316957		21.533	0.979914	0.261384
	21.594	0.585541	0.22311		21.594	0.00480784	0.321808		21.594	0.98649	0.276945
	21.655	0.626051	0.214176		21.655	0.0130588	0.342412		21.655	0.992145	0.287408
	21.716	0.692498	0.216349		21.716	0.0184275	0.342306		21.716	0.98851	0.272341
	21.777	0.750698	0.217078		21.777	0.00319608	0.324337		21.777	0.984114	0.2866
	21.838	0.789031	0.217812		21.838	0.00462353	0.331867		21.838	0.98649	0.326498
	21.899	0.811937	0.215533		21.899	0.00275294	0.336525		21.899	0.989216	0.361188
	21.96	0.834157	0.205298		21.96	0.00755294	0.357659		21.96	0.981325	0.380224
	22.021	0.896859	0.214455		22.021	0.00533725	0.368957		22.021	0.982831	0.424522
	22.082	0.933184	0.207882		22.082	0.00475686	0.390565		22.082	0.968643	0.467427
	22.143	0.960725	0.216824		22.143	0.000196078	0.411286		22.143	0.935392	0.45162
	22.204	0.955063	0.221827		22.204	0.00446274	0.440812		22.204	0.904608	0.448137
	22.265	0.904251	0.207976		22.265	0.00424314	0.462294		22.265	0.871204	0.440529
	22.326	0.851118	0.194204		22.326	0.00378824	0.458192		22.326	0.85478	0.436824
	22.387	0.795859	0.188278		22.387	0.00551372	0.440816
	22.448	0.719569	0.168675		22.448	0.00874118	0.434071
	22.509	0.649529	0.160573		22.509	0.00302353	0.422333
	22.57	0.601161	0.169149		22.57	0.00612157	0.443184
	22.631	0.564278	0.168831		22.631	0.00498823	0.408098
	22.692	0.507	0.152008		22.692	0.0051098	0.401576
	22.753	0.448392	0.148882		22.753	0.00223922	0.361322
	22.814	0.39849	0.14851		22.814	0.00615686	0.321776
	22.875	0.365047	0.141553		22.875	0.00611765	0.315325
	22.936	0.349361	0.12731		22.936	0.000584314	0.301055
	22.997	0.324714	0.103071		22.997	0.0072	0.330133
	23.058	0.35802	0.127173		23.058	0.00226275	0.314176
	23.119	0.383918	0.130682		23.119	0.00626275	0.325757
	23.18	0.431031	0.13329		23.18	0.00677647	0.319247
	23.241	0.49038	0.138827		23.241	0.00111373	0.309094
	23.302	0.541173	0.152529		23.302	0.00960784	0.322424
	23.363	0.571471	0.154275		23.363	0.00379608	0.321184
	23.424	0.607918	0.149733		23.424	0.00833333	0.297471
	23.485	0.623937	0.143341		23.485	0.0206549	0.330706
	23.546	0.620651	0.139235		23.546	0.0135922	0.308663
	23.607	0.638682	0.154314		23.607	0.000466667	0.27509
	23.668	0.699035	0.19062		23.668	0.00460784	0.277325
	23.729	0.715902	0.174282		23.729	0.000133333	0.27302
	23.79	0.722325	0.161608		23.79	0.0195882	0.266416
	23.851	0.758784	0.188616		23.851	0.00985882	0.238859
	23.912	0.771098	0.184957		23.912	0.00833333	0.234639
	23.973	0.789376	0.160765		23.973	0.019251	0.259729
	24.034	0.854961	0.170792		24.034	0.00873725	0.261933
	24.095	0.907192	0.182161		24.095	9.01961e-05	0.270467
	24.156	0.954141	0.19311		24.156	0.00286274	0.293486
	24.217	0.978631	0.207741		24.217	0.00691372	0.302475
					24.278	0.00729804	0.300827
					24.339	0.00972157	0.295565
					24.4	0.019498	0.302294
					24.461	0.00743922	0.280588
					24.522	2.99608e-13	0.235294
