# Supplementary material for: Interleukin-1 prevents SARS-CoV-2-induced membrane fusion to restrict viral transmission via induction of actin bundles
Source: eLife. 2025 Feb 12;13:RP98593. doi: 10.7554/eLife.98593 (PMC11820142; doi:10.7554/eLife.98593)
Supplement: Supplementary file 1. [file elife-98593-supp1.xlsx]

## Sheet: Sheet1
Gene	Forward 5’-3’	Reverse 5’-3’
IL1A	CAGCCAGAGAGGGAGTCATTT	TGTCTGGAACTTTGGCCATCTT
IL1B	CAGAAGTACCTGAGCTCGCC	AGATTCGTAGCTGGATGCCG
IL4	CTTTGCTGCCTCCAAGAACACA	GAACTGCCGGAGCACAGTC
IL6	CCACCGGGAACGAAAGAGAA	GAGAAGGCAACTGGACCGAA
IL8	ACTCCAAACCTTTCCACCCC	TTCTCAGCCCTCTTCAAAAACTTC
IL12A	CTCCAGAAGGCCAGACAAACTCT	AGGCCAGGCAACTCCCATTAG
IFNA1	TGACTCATACACCAGGTCACG	GGTCATAGTTATAGCAGGGGTGAG
IFNA2	CTTGTGCCTGGGAGGTTGTC	AGGTGAGCTGGCATACGAATC
IFNB1	GGCACAACAGGTAGTAGGCG	GAGAAGCACAACAGGAGAGC
IFNG	AGCCAACCTAAGCAAGATCCC	TGCCATTAAAGCACTGGCTC
IL1R1	GGTAGACGCACCCTCTGAAG	TCAGCCTCCAGAGAAGAAATCA
IL2RA	AGGGCTCTACACAGAGGTCC	GTGACGAGGCAGGAAGTCTC
IL4R	AAAACGACCCGGCAGATTTC	GGCTCCCTGTAGGAGTTGTG
IL6ST	ACAGCATCCAGTGTCACCTTT	TCCCCTCGTTCACAATGCAA
IL8RA	AGTTCTTGGCACGTCATCGT	CCCCTGAAGACACCAGTTCC
IL12RB1	TTCAGCATCGAAGTGCAGGT	TTCAGGCCAAGGTAGCCAAG
IFNAR1	TGTAACTGGTGGGATCTGCG	ACTCATCGCTCCTGTTCCAC
IFNGR1	TAGCAGCATGGCTCTCCTCTTTC	AGTTGGTGTAGGCACTGAGGAC
RELB	GATCGTCCACCAGACCGTG	GAAACGGCGAGCGAGAGT
NFKB1	TTTGGGAAGGCCTGAACAAATG	GGGATGGGCCTTCACATACA
NFKBIA	TGTGCTTCGAGTGACTGACC	TCACCCCACATCACTGAACG
SARS-CoV-2-N	GGGGAACTTCTCCTGCTAGAAT	CAGACATTTTGCTCTCAAGCTG
GAPDH	CGGGAAGGAAATGAATGGGC	GGAAAAGCATCACCCGGAGG
