# Supplementary material for: Interleukin-1 prevents SARS-CoV-2-induced membrane fusion to restrict viral transmission via induction of actin bundles
Source: eLife. 2025 Feb 12;13:RP98593. doi: 10.7554/eLife.98593 (PMC11820142; doi:10.7554/eLife.98593)
Supplement: Supplementary file 2. [file elife-98593-supp2.xlsx]

## Sheet: Sheet1
Gene	sgRNA
TLR2	TGGAAACGTTAACAATCCGG
MyD88	GGGGATCAGTCGCTTCTGAT
TRAF6	GAAGCAGTGCAAACGCCATG
MAP3K7	GATCGACTACAAGGAGATCG
RELB	GGGCGGCGTCTTGAACACAA
NFKB1	GTCACTCTAACGTATGCAAC
NFKBIA	CTGGACGACCGCCACGACAG
